# Supplementary material for: Palladium-catalyzed asymmetric [4 + 3] cycloaddition of methylene-trimethylenemethane: access to seven-membered exocyclic axially chiral allenes
Source: Royal Society of Chemistry journal article supplement (doi:10.1039/d4sc01649a), 2024-01-01
Supplement: d4sc01649a1.pdf [file d4sc01649a1.pdf]

## Supporting Information

# Palladium-Catalyzed Asymmetric [4+3] Cycloaddition of Methylene-Trimethylenemethane: Access to Seven-Membered Exocyclic Axially Chiral Allenes

Yafei Wu<sup>a</sup>, Zhuo Wang<sup>a</sup>, Yuqian Shan<sup>a</sup>, Yukun Ma<sup>a</sup>, Teng Li<sup>a</sup>, Chunhao Yuan<sup>c\*</sup>,  
Hongchao Guo<sup>b\*</sup> and Biming Mao<sup>a\*</sup>

<sup>a</sup>School of Pharmaceutical Sciences & Institute of Materia Medica, Shandong First Medical University & Shandong Academy of Medical Sciences, Jinan 250117, Shandong, P. R. China. E-mail: [maobiming@sdfmu.edu.cn](mailto:maobiming@sdfmu.edu.cn)

<sup>b</sup>Department of Applied Chemistry and Innovation Center of Pesticide Research, China Agricultural University, Beijing 100193, P. R. China.

<sup>c</sup>School of Chemistry and Pharmaceutical Engineering, Shandong First Medical University, Shandong Academy of Medical Sciences, Taian 271016, Shandong, P. R. China.

### Table of Contents

|                                                                                                                  |      |
|------------------------------------------------------------------------------------------------------------------|------|
| General Information                                                                                              | S2   |
| The stereochemistry analysis and the proposed transition state <b>TS-1</b>                                       | S3   |
| Further optimizations                                                                                            | S4   |
| Synthesis of Substrates <b>1</b> and <b>2</b>                                                                    | S5   |
| Characterization Data of the Allene Donors <b>1b</b> , <b>1c</b> , <b>1e</b> , <b>1f</b> , <b>1g</b> , <b>1j</b> | S6   |
| General Procedure for Preparation of Racemic [4+3] Products                                                      | S8   |
| General Procedure for Preparation of Chiral [4+3] Products                                                       | S8   |
| Characterization Data of the Products <b>3</b>                                                                   | S9   |
| Scaled-up Synthesis of the Product <b>3ba</b>                                                                    | S26  |
| Transformations of the Product <b>3ia</b> and <b>3ba</b>                                                         | S26  |
| References                                                                                                       | S28  |
| <sup>1</sup> H and <sup>13</sup> C NMR Spectra of All Products                                                   | S29  |
| HPLC Chromatograms of All Products                                                                               | S72  |
| X-Ray Crystallographic Data of <b>3ba</b> and <b>6</b>                                                           | S109 |

## General Information

All reactions were performed under Ar atmospheres in oven-dried glassware with magnetic stirring. Unless otherwise stated, all reagents were purchased from commercial suppliers and used without further purification. All solvents were purified and dried according to standard methods prior to use. Organic solutions were concentrated under reduced pressure on a rotary evaporator or an oil pump. Reactions were monitored through thin layer chromatography (TLC) on silica gel-precoated glass plates. Chromatograms were visualized by fluorescence quenching with UV light at 254 nm. Flash column chromatography was performed using Qingdao Haiyang flash silica gel (200–300 mesh). NMR spectra were recorded on a Bruker spectrometer at 800 MHz ( $^1\text{H}$  NMR), 201 MHz ( $^{13}\text{C}$  NMR).  $^1\text{H}$  NMR data are reported as follows: chemical shift, multiplicity (s = singlet; d = doublet; q = quartet; m = multiplet; br = broad), coupling constant (Hz), and integral. Data for  $^{13}\text{C}$  NMR spectra are reported in terms of chemical shift. Optical rotation was obtained on a Rudolph Autopol VI automatic polarimeter. Melting points were determined by an X-4 digital micro melting point apparatus. Accurate mass measurements were performed using a Bruker micrOTOF-QII instrument with the ESI-MS technique. HPLC analysis was performed on DIONEX UltiMate 3000, UV detection monitored at 210 nm or 254 nm, using a Chiralcel AD-H column, Chiralcel OX-H column, Chiralcel AS-H column, Chiralpak IA column, Chiralpak IB column and Chiralpak IC column with *n*-hexane and *i*-PrOH as the eluent. X-ray crystallographic data were collected using a Bruker D8 Venture.

Starting materials and reagents were purchased directly from commercial suppliers and used without further purifications. All solvents used as reaction medium were distilled before the use. The allene TMM donors **1**<sup>[1]</sup> and benzofuran-derived azadienes **2**<sup>[2]</sup> were synthesized using known literature procedures.

## The stereochemistry analysis and the proposed transition state TS-1

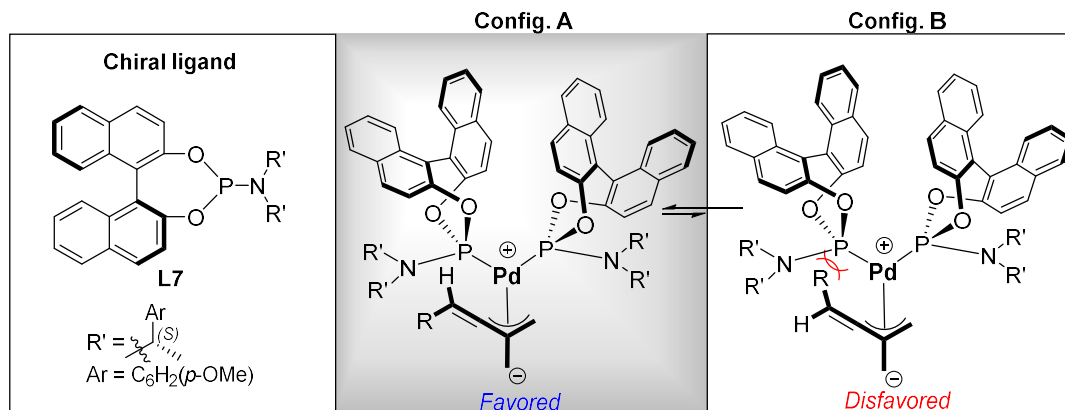

Figure A. The stereochemistry analysis.

We propose two possible configurations separately (Config. A and B) for key intermediate to explain the opposite diastereoselectivity when using chiral ligand **L7**. Due to steric hindrance, the bulky palladium complex and the R-substituent of the allene will be placed on opposing faces, resulting in the competition of two configurations, and the configuration A is favorable (Fig. A). The sterically crowded chiral ligand dominates so that the carbanion of the intermediate **A** attacks at the *Si* face of the olefinic bond in the benzofuran-derived azadiene **2** in the transition state **TS-1** (Fig. B). It could be observed from bottom to top in **TS-1** in the Fischer projection.

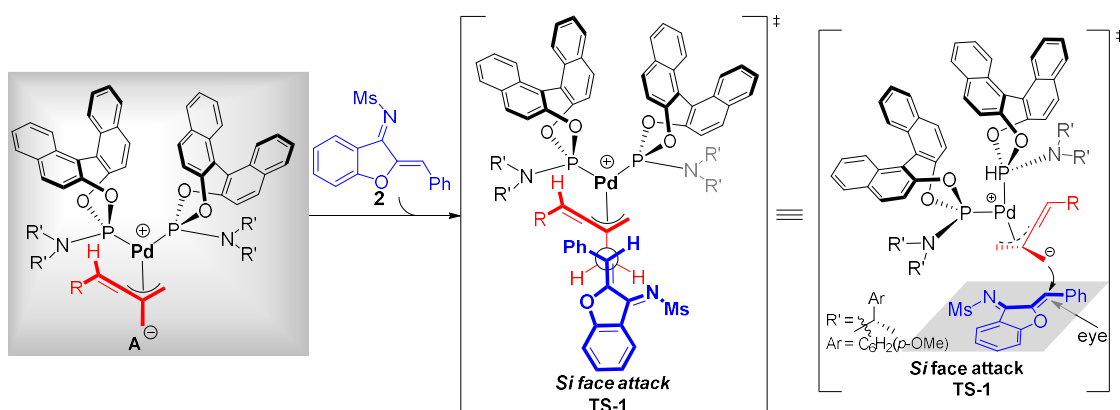

Figure B. The proposed transition state **TS-1**.

## Further optimizations

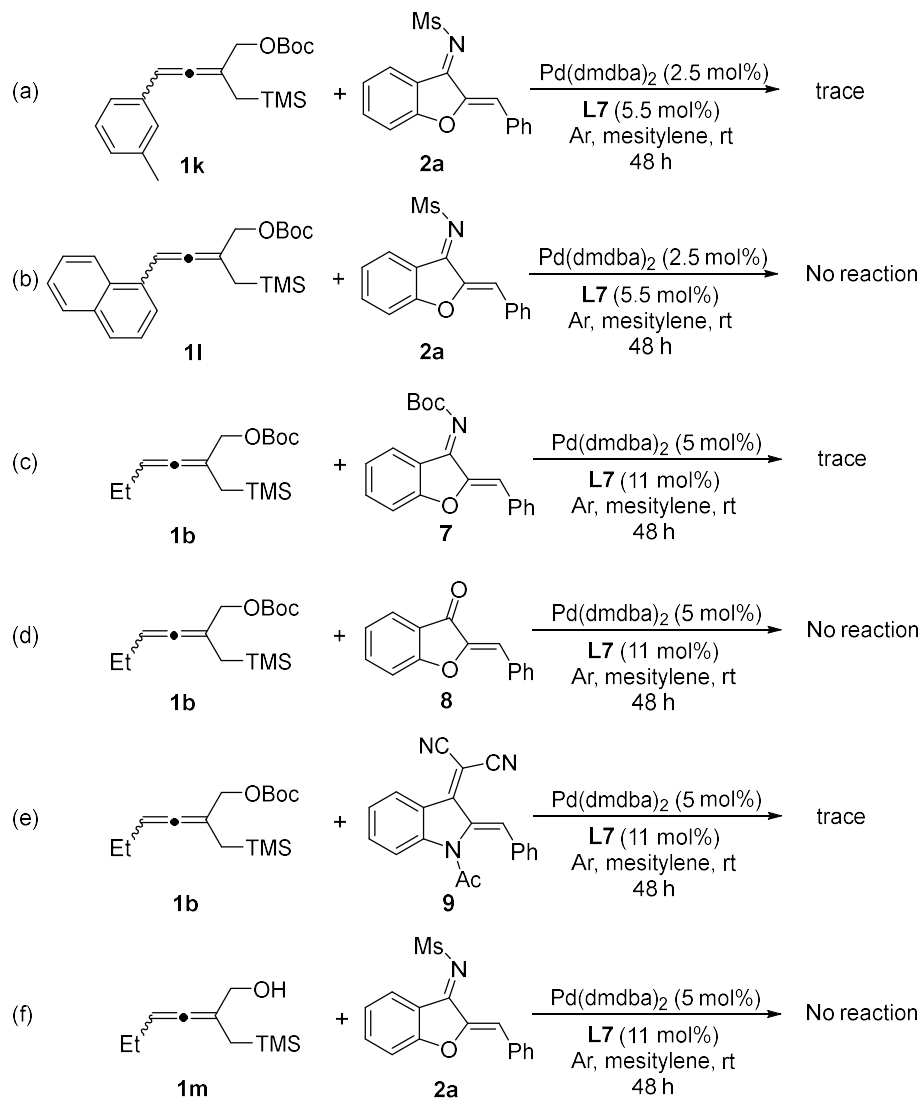

Figure C. Other azadiene, unsaturated ketone, diene and allenes tested in the reaction.



## Synthesis of Substrates 1 and 2

**A:** The substrates **1** were synthesized according to previous reported protocols.<sup>[1]</sup>

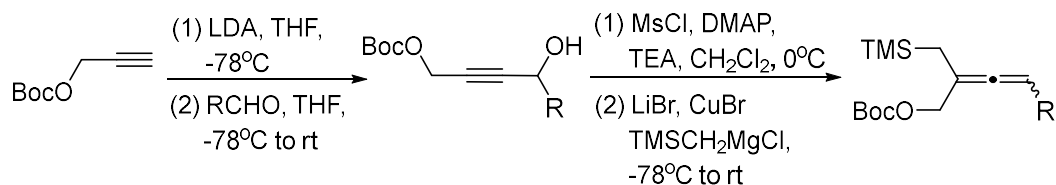

A solution of LDA (1.2 equiv, 2 M in THF) was dropwise to a solution of tert-butyl prop-2-yn-1-yl carbonate (1.0 equiv) in THF (0.2 M) at -78 °C under argon atmosphere and the reaction mixture was stirred for 1 h. The corresponding aldehyde (1.2 equiv) was then added and the solution was stirred at room temperature for 2 h. The reaction was quenched by addition of saturated aqueous NH<sub>4</sub>Cl solution, the organic phase was separated, and the aqueous phase was extracted with ethyl acetate. The combined organic fractions were dried over MgSO<sub>4</sub>, filtered, and concentrated in vacuo. The crude solid was purified by silica gel chromatography (10% EtOAc/PE) to yield a yellow oil.

To a solution of the corresponding alcohol (1.0 equiv), triethylamine (1.2 equiv), and DMAP (0.2 equiv) in CH<sub>2</sub>Cl<sub>2</sub> (0.2 M) at 0 °C was added methanesulfonyl chloride (1.1 equiv). The solution was warmed to room temperature and stirred for 30 min while being monitored by TLC. The reaction mixture washed twice with water, dried over MgSO<sub>4</sub>, and concentrated by rotary evaporation. The crude oil was used immediately in the next reaction without further purification or characterization. A solution of LiBr (1.0 equiv) and CuBr (1.0 equiv) in THF (0.4 M) was stirred for 15 min at room temperature. The reaction mixture was then cooled to -78 °C and a solution of ((trimethylsilyl)methyl) magnesium chloride (1.0 M in THF, 1.0 equiv) was added. The solution stirred at this temperature for 15 min, then the crude mesylate (1.0 equiv) in THF was added followed by dry HMPA. The reaction was warmed to room temperature, stirred 30 min, then quenched with saturated aqueous NH<sub>4</sub>Cl. The organic phase was separated, and the aqueous phase was extracted three times with petroleum ether. The combined organic extracts were dried over MgSO<sub>4</sub>, filtered, and concentrated by rotary evaporation. The crude oil was purified by column chromatography on silica gel (1-5%Et<sub>2</sub>O/PE) to give a yellow oil.

**B:** The substrates **2** (benzofuran-derived azadiene) : All benzofuran-derived azadienes (**2**) were prepared by the reported procedure.<sup>[2]</sup>

## Characterization Data of the Allene Donors **1b**, **1c**, **1e**, **1f**, **1g**, **1j**

### *tert*-butyl (2-((trimethylsilyl)methyl)hexa-2,3-dien-1-yl) carbonate (**1b**)

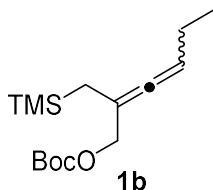

**1b** was prepared according to the general procedure as described above and purified by column chromatography on silica gel (0-5% Et<sub>2</sub>O/PE) to give a yellow oil. <sup>1</sup>H NMR (800 MHz, CDCl<sub>3</sub>) δ 5.17 (ddd, *J* = 6.4, 3.9, 2.3 Hz, 1H), 4.43 – 4.36 (m, 3H), 1.95 (ddd, *J* = 7.9, 6.4, 2.0 Hz, 2H), 1.43 (s, 11H), 0.95 (t, *J* = 7.5 Hz, 3H), 0.00 (s, 9H). <sup>13</sup>C NMR (201 MHz, CDCl<sub>3</sub>) δ 202.9, 154.8, 99.0, 95.9, 95.9, 83.1, 70.3, 29.1, 23.8, 19.6, 14.8, 0.0. HRMS (ESI) calcd for C<sub>15</sub>H<sub>29</sub>O<sub>3</sub>Si<sup>+</sup> [M+H]<sup>+</sup> 285.1880, found 285.1890.

### *tert*-butyl (2-((trimethylsilyl)methyl)hepta-2,3-dien-1-yl) carbonate (**1c**)

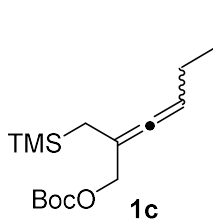

**1c** was prepared according to the general procedure as described above and purified by column chromatography on silica gel (0-5% Et<sub>2</sub>O/PE) to give a yellow oil. <sup>1</sup>H NMR (800 MHz, CDCl<sub>3</sub>) δ 5.12 (tt, *J* = 4.4, 2.3 Hz, 1H), 4.42 – 4.33 (m, 2H), 1.92 (q, *J* = 7.2 Hz, 2H), 1.53 – 1.27 (m, 13H), 0.87 (t, *J* = 7.4 Hz, 3H), 0.00 (s, 9H). <sup>13</sup>C NMR (201 MHz, CDCl<sub>3</sub>) δ 203.5, 154.8, 98.3, 93.9, 83.1, 70.4, 32.7, 32.7, 29.1, 23.7, 19.6, 14.9, 0.0. HRMS (ESI) calcd for C<sub>16</sub>H<sub>31</sub>O<sub>3</sub>Si<sup>+</sup> [M+H]<sup>+</sup> 299.2037, found 299.2037.

### *tert*-butyl (2-((trimethylsilyl)methyl)trideca-2,3-dien-1-yl) carbonate (**1e**)

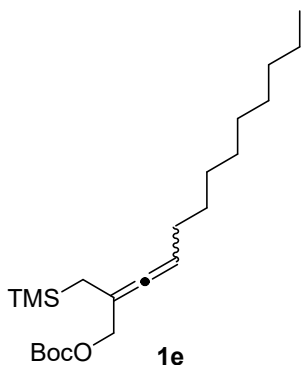

**1e** was prepared according to the general procedure as described above and purified by column chromatography on silica gel (0-5% Et<sub>2</sub>O/PE) to give a yellow oil. <sup>1</sup>H NMR (800 MHz, CDCl<sub>3</sub>) δ 5.19 – 5.07 (m, 1H), 4.39 (dd, *J* = 4.3, 2.4 Hz, 2H), 1.97 – 1.86 (m, 2H), 1.44 (s, 9H), 1.37 – 1.14 (m, 16H), 0.83 (t, *J* = 7.1 Hz, 3H), 0.00 (s, 9H). <sup>13</sup>C NMR (201 MHz, CDCl<sub>3</sub>) δ 203.5, 154.8, 98.3, 94.1, 83.1, 70.4, 33.2, 30.9, 30.8, 30.6, 30.5, 30.4, 29.1, 23.9, 19.5, 15.4, 0.0. HRMS (ESI) calcd for C<sub>22</sub>H<sub>43</sub>O<sub>3</sub>Si<sup>+</sup> [M+H]<sup>+</sup> 383.2976, found 383.2968.

***tert*-butyl (6,6-dimethyl-2-((trimethylsilyl)methyl)hepta-2,3-dien-1-yl) carbonate (**1f**)**

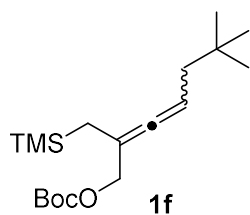

**1f** was prepared according to the general procedure as described above and purified by column chromatography on silica gel (0-5% Et<sub>2</sub>O/PE) to give a yellow oil. <sup>1</sup>H NMR (800 MHz, CDCl<sub>3</sub>) δ 5.10 (ddt, *J* = 10.3, 4.8, 2.3 Hz, 1H), 4.48 – 4.32 (m, 2H), 1.87 – 1.78 (m, 2H), 1.51 – 1.22 (m, 11H), 0.86 (s, 9H), 0.00 (s, 9H). <sup>13</sup>C NMR (201 MHz, CDCl<sub>3</sub>) δ 204.8, 154.8, 97.1, 90.7, 83.1, 70.4, 45.3, 32.3, 30.3, 29.1, 19.5, 0.0. HRMS (ESI) calcd for C<sub>18</sub>H<sub>34</sub>O<sub>3</sub>Si<sup>+</sup> [M+H]<sup>+</sup> 327.2350, found 327.2357.

***tert*-butyl (4-cyclobutyl-2-((trimethylsilyl)methyl)buta-2,3-dien-1-yl) carbonate (**1g**)**

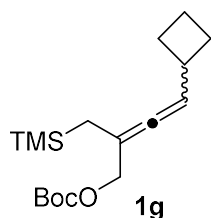

**1g** was prepared according to the general procedure as described above and purified by column chromatography on silica gel (0-5% Et<sub>2</sub>O/PE) to give a yellow oil. <sup>1</sup>H NMR (800 MHz, CDCl<sub>3</sub>) δ 5.25 (dt, *J* = 6.7, 2.4 Hz, 1H), 4.41 (d, *J* = 2.5 Hz, 2H), 2.86 – 2.76 (m, 1H), 2.14 – 1.98 (m, 2H), 1.89 – 1.68 (m, 4H), 1.44 (s, 9H), 1.31 (dd, *J* = 5.7, 2.5 Hz, 2H), 0.00 (s, 9H). <sup>13</sup>C NMR (201 MHz, CDCl<sub>3</sub>) δ 202.2, 154.7, 99.5, 99.4, 83.1, 70.3, 36.3, 30.3, 29.8, 29.1, 19.7, 19.6, 0.0. HRMS (ESI) calcd for C<sub>17</sub>H<sub>31</sub>O<sub>3</sub>Si<sup>+</sup> [M+H]<sup>+</sup> 311.2037, found 311.2028.

***tert*-butyl (5-phenyl-2-((trimethylsilyl)methyl)penta-2,3-dien-1-yl) carbonate (**1j**)**

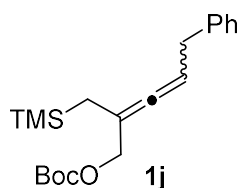

**1j** was prepared according to the general procedure as described above and purified by column chromatography on silica gel (0-5% Et<sub>2</sub>O/PE) to give a yellow oil. <sup>1</sup>H NMR (800 MHz, CDCl<sub>3</sub>) δ 7.28 – 7.06 (m, 5H), 5.29 (ddd, *J* = 7.3, 4.9, 2.4 Hz, 1H), 4.41 (t, *J* = 2.5 Hz, 2H), 3.30 (dd, *J* = 7.3, 2.1 Hz, 2H), 1.43 (s, 9H), 1.32 (dd, *J* = 6.0, 2.4 Hz, 2H), 0.00 (s, 9H). <sup>13</sup>C NMR (201 MHz, CDCl<sub>3</sub>) δ 203.7, 154.7, 141.6, 129.8, 129.7, 129.6, 127.4, 99.2, 93.5, 83.2, 69.9, 37.4, 29.1, 19.5, 0.0. HRMS (ESI) calcd for C<sub>20</sub>H<sub>31</sub>O<sub>3</sub>Si<sup>+</sup> [M+H]<sup>+</sup> 347.2037, found 347.2044.

### General Procedure for Preparation of Racemic [4+3] Products

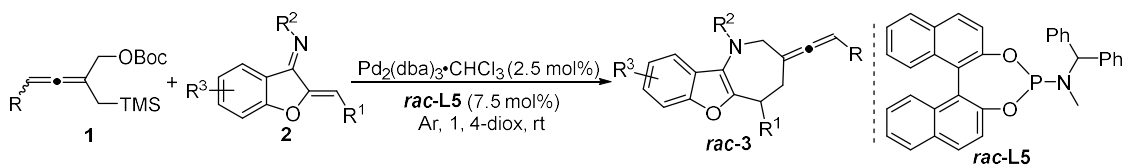

Under argon atmosphere, to a mixture of TMM donor **1** (0.20 mmol), benzofuran-derived azadiene **2** (0.10 mmol) and catalyst  $\text{Pd}_2(\text{dba})_3 \cdot \text{CHCl}_3$  (2.5 mol%, 0.0025 mmol) / *rac*-**L5** (7.5 mol%, 0.0075 mmol) in a Schlenk tube, 1 mL of 1,4-dioxane were added at room temperature. The resulting mixture was stirred until the starting material were completely consumed (monitored by TLC) and then was concentrated to dryness. The residue was purified through flash column chromatography (EtOAc/PE= 1:25) to afford the corresponding racemic cycloaddition product *rac*-**3**.

### General Procedure for Preparation of Chiral [4+3] Products

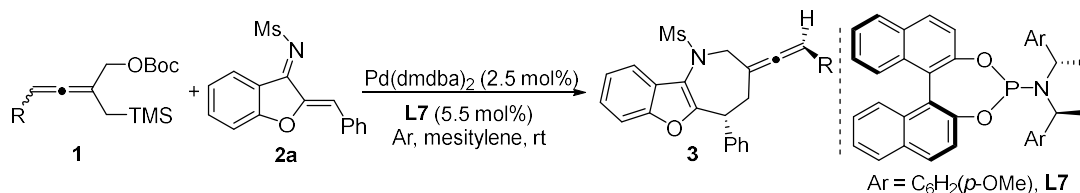

Under argon atmosphere, to a mixture of TMM donor **1** (0.20 mmol), benzofuran-derived azadiene **2a** (0.10 mmol) and catalyst  $\text{Pd}(\text{dmdba})_2$  (2.5 mol%, 0.0025 mmol) / **L7** (5.5 mol%, 0.0055 mmol) in a Schlenk tube, 1 mL of mesitylene were added at room temperature. The resulting mixture was stirred until the starting material were completely consumed (monitored by TLC) and then was concentrated to dryness. The residue was purified through flash column chromatography (EtOAc/PE= 1:25) to afford the corresponding chiral cycloaddition product **3**.

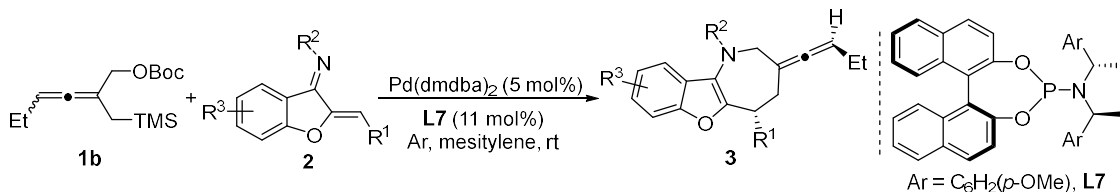

Under argon atmosphere, to a mixture of TMM donor **1b** (0.20 mmol), benzofuran-derived azadiene **2** (0.10 mmol) and catalyst  $\text{Pd}(\text{dmdba})_2$  (5 mol%, 0.005 mmol) / **L7** (11 mol%, 0.011 mmol) in a Schlenk tube, 1 mL of mesitylene were added at room temperature. The resulting mixture was stirred until the starting material were completely consumed

(monitored by TLC) and then was concentrated to dryness. The residue was purified through flash column chromatography (EtOAc/PE= 1:25) to afford the corresponding chiral cycloaddition product **3**.

### Characterization Data of the Products 3

#### (*R*)-3-((*S*)-3-methylbut-1-en-1-ylidene)-1-(methylsulfonyl)-5-phenyl-2,3,4,5-tetrahydro-1*H*-benzofuro[3,2-*b*]azepine (**3aa**)

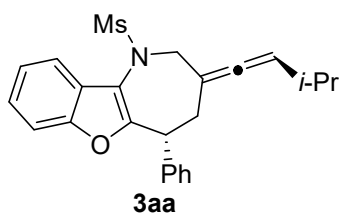

Prepared according to the general procedure as described above in 92% yield (37.4 mg), 6:1 dr and 98% ee. It was purified by flash chromatography 4% EtOAc/PE) to afford a white solid. mp =48 – 50°C;  $[\alpha]_D^{25} = -53.1$  (*c* 1.33, CH<sub>2</sub>Cl<sub>2</sub>); <sup>1</sup>H NMR (800 MHz, CDCl<sub>3</sub>) δ 7.70 (d, *J* = 7.1 Hz, 1H), 7.47 – 7.09 (m, 8H), 5.26 – 5.12 (m, 1H), 4.66 (d, *J* = 15.4 Hz, 1H), 4.52 – 4.40 (m, 1H), 4.28 – 4.05 (m, 1H), 3.07 – 2.72 (m, 5H), 2.36 – 2.16 (m, 1H), 0.97 (dd, *J* = 10.6, 6.8 Hz, 6H). <sup>13</sup>C NMR (201 MHz, CDCl<sub>3</sub>) δ 201.7, 153.3, 140.7, 128.7, 128.6, 127.8, 127.7, 127.3, 127.2, 126.6, 124.6, 123.2, 120.4, 111.41, 111.39, 100.2, 98.5, 54.2, 45.3, 40.5, 34.5, 28.1, 22.5, 22.4. HRMS (ESI) calcd for C<sub>24</sub>H<sub>26</sub>NO<sub>3</sub>S<sup>+</sup> [M+H]<sup>+</sup> 408.1628, found 408.1628. HPLC analysis: **3aa**, 98% ee (IA, 5% isopropanol/hexane, 1.0 mL/min, UV: 210 nm), t<sub>R</sub> = 12.363 min (minor), 19.780 min (major).

#### (*R*)-3-((*S*)-but-1-en-1-ylidene)-1-(methylsulfonyl)-5-phenyl-2,3,4,5-tetrahydro-1*H*-benzofuro[3,2-*b*]azepine (**3ba**)

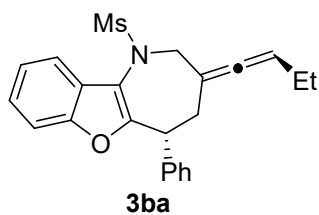

Prepared according to the general procedure as described above in 95% yield (37.3 mg), 19:1 dr and 96% ee. It was purified by flash chromatography 4% EtOAc/PE) to afford a white solid. mp =140 – 142°C;  $[\alpha]_D^{25} = -74.3$  (*c* 1.60, CH<sub>2</sub>Cl<sub>2</sub>); <sup>1</sup>H NMR (800 MHz, CDCl<sub>3</sub>) δ 7.76 – 7.58 (m, 1H), 7.39 – 7.04 (m, 8H), 5.16 (ddq, *J* = 6.2, 4.1, 2.2 Hz, 1H), 4.57 (d, *J* = 14.5 Hz, 1H), 4.39 (dd, *J* = 8.6, 5.1 Hz, 1H), 4.18 – 3.93 (m, 1H), 2.95 (dd, *J* = 14.1, 8.6 Hz, 1H), 2.72 (d, *J* = 11.7 Hz, 4H), 2.00 – 1.84 (m, 2H), 0.88 (td, *J* = 7.4, 1.3 Hz, 3H). <sup>13</sup>C NMR (201 MHz, CDCl<sub>3</sub>) δ 202.9, 154.4, 153.2, 140.6, 128.7, 128.6, 127.8, 127.2, 126.7, 124.6, 123.2, 120.5, 119.5, 111.4, 97.9, 94.4, 54.1, 45.2, 40.5, 34.5, 21.8, 13.3. HRMS (ESI) calcd for C<sub>23</sub>H<sub>24</sub>NO<sub>3</sub>S<sup>+</sup> [M+H]<sup>+</sup>

394.1471, found 394.1465. HPLC analysis: **3ba**, 96% ee (IA, 5% isopropanol/hexane, 1.0 mL/min, UV: 254 nm),  $t_R$  = 12.143 min (minor), 23.803 min (major).

**(R)-1-(methylsulfonyl)-3-((S)-pent-1-en-1-ylidene)-5-phenyl-2,3,4,5-tetrahydro-1H-benzofuro[3,2-b]azepine (3ca)**

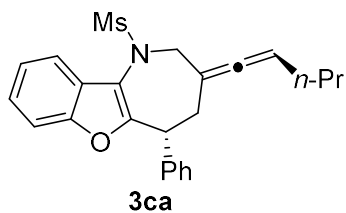

Prepared according to the general procedure as described above in 50% yield (20.4 mg), 19:1 dr and 98% ee. It was purified by flash chromatography 4% EtOAc/PE) to afford a viscous liquid;  $[\alpha]_D^{25}$  = -52.4 (*c* 0.94, CH<sub>2</sub>Cl<sub>2</sub>); <sup>1</sup>H NMR (800 MHz, CDCl<sub>3</sub>)  $\delta$  7.67 – 7.58 (m, 1H), 7.41 – 7.02 (m, 8H), 5.08 (tt, *J* = 6.8, 2.1 Hz, 1H), 4.64 – 4.50 (m, 1H), 4.39 (dd, *J* = 8.4, 5.0 Hz, 1H), 4.06 (d, *J* = 14.3 Hz, 1H), 3.02 – 2.65 (m, 5H), 1.91 (hept, *J* = 7.7 Hz, 2H), 1.31 (dtt, *J* = 28.3, 14.1, 7.1 Hz, 2H), 0.82 (t, *J* = 7.3 Hz, 3H). <sup>13</sup>C NMR (201 MHz, CDCl<sub>3</sub>)  $\delta$  203.4, 154.4, 153.2, 140.6, 128.7, 128.6, 127.8, 127.7, 127.2, 127.1, 126.7, 124.6, 123.2, 120.5, 119.5, 111.4, 97.1, 92.4, 54.1, 45.2, 40.5, 34.6, 30.7, 22.1, 13.6. HRMS (ESI) calcd for C<sub>24</sub>H<sub>26</sub>NO<sub>3</sub>S<sup>+</sup> [M+H]<sup>+</sup> 408.1628, found 408.1625. HPLC analysis: **3ca**, 98% ee (IC, 5% isopropanol/hexane, 1.0 mL/min, UV: 254 nm),  $t_R$  = 27.453 min (major), 32.047 min (minor).

**(R)-3-((S)-hept-1-en-1-ylidene)-1-(methylsulfonyl)-5-phenyl-2,3,4,5-tetrahydro-1H-benzofuro[3,2-b]azepine (3da)**

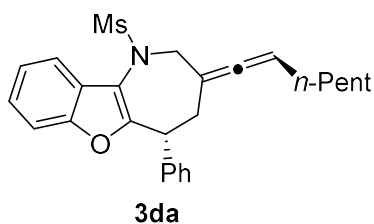

Prepared according to the general procedure as described above in 80% yield (34.8 mg), >20:1 dr and 96% ee. It was purified by flash chromatography 4% EtOAc/PE) to afford a viscous liquid;  $[\alpha]_D^{25}$  = -40.8 (*c* 0.80, CH<sub>2</sub>Cl<sub>2</sub>); <sup>1</sup>H NMR (800 MHz, CDCl<sub>3</sub>)  $\delta$  7.75 – 7.64 (m, 1H), 7.43 – 7.15 (m, 8H), 5.17 (tt, *J* = 6.7, 2.2 Hz, 1H), 4.65 (d, *J* = 15.8 Hz, 1H), 4.46 (dd, *J* = 8.6, 5.1 Hz, 1H), 4.23 – 4.01 (m, 1H), 3.08 – 2.67 (m, 5H), 2.12 – 1.94 (m, 2H), 1.41 – 1.15 (m, 6H), 0.83 (t, *J* = 7.1 Hz, 3H). <sup>13</sup>C NMR (201 MHz, CDCl<sub>3</sub>)  $\delta$  203.2, 154.4, 153.3, 140.6, 128.69, 128.67, 127.8, 127.2, 126.7, 124.6, 123.2, 120.4, 119.4, 111.4, 97.2, 92.7, 54.1, 45.3, 40.5, 34.5, 31.2, 28.6, 28.5, 22.4, 14.0. HRMS (ESI) calcd for C<sub>26</sub>H<sub>30</sub>NO<sub>3</sub>S<sup>+</sup> [M+H]<sup>+</sup> 436.1941, found 436.1943. HPLC analysis: **3da**, 96% ee (IA, 5% isopropanol/hexane, 1.0 mL/min, UV: 254 nm),  $t_R$  = 11.44 min (minor), 20.557 min (major).

**(R)-1-(methylsulfonyl)-5-phenyl-3-((S)-undec-1-en-1-ylidene)-2,3,4,5-tetrahydro-1H-benzofuro[3,2-b]azepine (3ea)**

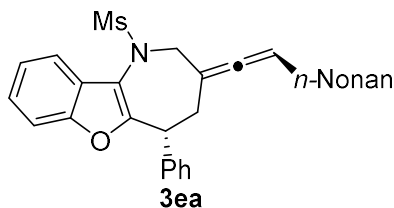

Prepared according to the general procedure as described above in 89% yield (43.8 mg), >20:1 dr and 96% ee. It was purified by flash chromatography 4% EtOAc/PE) to afford a viscous liquid;  $[\alpha]_D^{25} = -59.4$  (*c* 2.20, CH<sub>2</sub>Cl<sub>2</sub>); <sup>1</sup>H NMR (800 MHz, CDCl<sub>3</sub>)  $\delta$  7.70 (ddt, *J* = 7.7, 5.2, 3.0 Hz, 1H), 7.47 – 7.17 (m, 8H), 5.17 (td, *J* = 6.9, 6.4, 3.4 Hz, 1H), 4.71 – 4.59 (m, 1H), 4.45 (dd, *J* = 8.6, 5.1 Hz, 1H), 4.20 – 4.07 (m, 1H), 3.06 – 2.74 (m, 5H), 1.47 – 1.18 (m, 14), 0.88 (t, *J* = 7.3 Hz, 3H). <sup>13</sup>C NMR (201 MHz, CDCl<sub>3</sub>)  $\delta$  203.2, 154.4, 153.3, 140.7, 128.7, 128.6, 127.8, 127.2, 126.7, 124.6, 123.2, 120.4, 119.4, 111.4, 97.3, 92.7, 54.1, 45.4, 40.5, 34.5, 31.9, 29.6, 29.4, 29.3, 29.11, 28.9, 28.6, 22.7, 14.2. HRMS (ESI) calcd for C<sub>30</sub>H<sub>38</sub>NO<sub>3</sub>S<sup>+</sup> [M+H]<sup>+</sup> 492.2567, found 492.2554. HPLC analysis: **3ea**, 96% ee (IA, 5% isopropanol/hexane, 1.0 mL/min, UV: 254 nm), *t*<sub>R</sub> = 10.123 min (minor), 18.617 min (major).

**(R)-3-((S)-4,4-dimethylpent-1-en-1-ylidene)-1-(methylsulfonyl)-5-phenyl-2,3,4,5-tetrahydro-1H-benzofuro[3,2-b]azepine (3fa)**

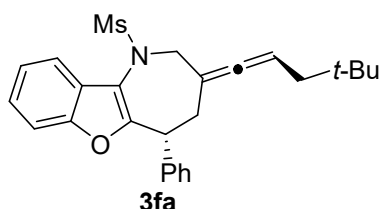

Prepared according to the general procedure as described above in 70% yield (30.4 mg), 9:1 dr and 97% ee. It was purified by flash chromatography 4% EtOAc/PE) to afford a white solid. mp = 52 – 54°C;  $[\alpha]_D^{25} = -47.7$  (*c* 1.00, CH<sub>2</sub>Cl<sub>2</sub>); <sup>1</sup>H NMR (800 MHz, CDCl<sub>3</sub>)  $\delta$  7.67 – 7.60 (m, 1H), 7.37 – 7.12 (m, 8H), 5.04 (tt, *J* = 8.3, 2.1 Hz, 1H), 4.56 (s, 1H), 4.40 (dd, *J* = 8.3, 4.8 Hz, 1H), 4.07 (s, 1H), 2.98 (dd, *J* = 14.2, 8.3 Hz, 1H), 2.69 (d, *J* = 17.5 Hz, 4H), 1.82 (d, *J* = 8.2 Hz, 2H), 0.83 (d, *J* = 18.3 Hz, 9H). <sup>13</sup>C NMR (201 MHz, CDCl<sub>3</sub>)  $\delta$  204.4, 153.2, 140.6, 128.7, 128.6, 127.8, 127.7, 127.2, 126.7, 124.6, 123.2, 120.5, 119.6, 111.4, 95.7, 89.2, 53.9, 45.1, 43.6, 40.5, 34.7, 31.1, 29.1, 29.0. HRMS (ESI) calcd for C<sub>26</sub>H<sub>30</sub>NO<sub>3</sub>S<sup>+</sup> [M+H]<sup>+</sup> 436.1941, found 436.1933. HPLC analysis: **3fa**, 97% ee (IA, 5% isopropanol/hexane, 1.0 mL/min, UV: 254 nm), *t*<sub>R</sub> = 9.67 min (minor), 16.79 min (major).

**(R)-3-((S)-2-cyclobutylvinylidene)-1-(methylsulfonyl)-5-phenyl-2,3,4,5-tetrahydro-1H-benzofuro[3,2-b]azepine (3ga)**

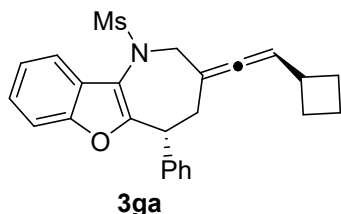

Prepared according to the general procedure as described above in 96% yield (40.2 mg), 9:1 dr and 85% ee. It was purified by flash chromatography 4% EtOAc/PE) to afford a white solid. mp = 62 – 64°C;  $[\alpha]_D^{25} = -51.8$  (*c* 1.95, CH<sub>2</sub>Cl<sub>2</sub>); <sup>1</sup>H NMR (800 MHz, CDCl<sub>3</sub>) δ 7.69 – 7.55 (m, 1H), 7.38 – 7.06 (m, 8H), 5.27 – 5.18 (m, 1H), 4.58 (d, *J* = 15.3 Hz, 1H), 4.38 (dd, *J* = 8.6, 5.1 Hz, 1H), 4.07 (d, *J* = 15.3 Hz, 1H), 3.04 – 2.62 (m, 6H), 2.03 (p, *J* = 8.0 Hz, 2H), 1.88 – 1.60 (m, 4H). <sup>13</sup>C NMR (201 MHz, CDCl<sub>3</sub>) δ 202.1, 154.4, 153.3, 140.6, 128.7, 128.6, 127.82, 127.80, 127.2, 126.7, 124.6, 123.2, 120.4, 119.5, 111.4, 98.4, 97.8, 54.1, 45.4, 40.5, 34.6, 34.3, 28.9, 28.8, 18.5. HRMS (ESI) calcd for C<sub>25</sub>H<sub>26</sub>NO<sub>3</sub>S<sup>+</sup> [M+H]<sup>+</sup> 420.1628, found 420.1626. HPLC analysis: **3ga**, 85% ee (AD-H, 5% isopropanol/hexane, 1.0 mL/min, UV: 254 nm), *t<sub>R</sub>* = 16.073 min (minor), 28.217 min (major).

**(R)-3-((S)-2-cyclohexylvinylidene)-1-(methylsulfonyl)-5-phenyl-2,3,4,5-tetrahydro-1H-benzofuro[3,2-b]azepine (3ha)**

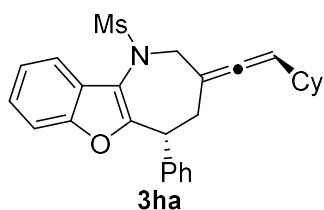

Prepared according to the general procedure as described above in 89% yield (39.8 mg), 5.7:1 dr and 95% ee. It was purified by flash chromatography 4% EtOAc/PE) to afford a white solid. mp = 61 – 64°C;  $[\alpha]_D^{25} = -67.2$  (*c* 1.79, CH<sub>2</sub>Cl<sub>2</sub>); <sup>1</sup>H NMR (800 MHz, CDCl<sub>3</sub>) δ 7.67 – 7.58 (m, 1H), 7.40 – 7.10 (m, 8), 5.08 (dt, *J* = 5.7, 2.5 Hz, 1H), 4.58 (d, *J* = 15.1 Hz, 1H), 4.38 (dd, *J* = 8.6, 5.3 Hz, 1H), 4.12 – 3.98 (m, 1H), 3.02 – 2.65 (m, 5H), 1.91 (ddd, *J* = 10.9, 7.7, 4.1 Hz, 1H), 1.70 – 1.45 (m, 5H), 1.26 – 0.87 (m, 5H). <sup>13</sup>C NMR (201 MHz, CDCl<sub>3</sub>) δ 202.2, 154.4, 153.3, 140.7, 128.7, 128.6, 127.9, 127.8, 127.2, 127.1, 126.7, 124.6, 123.23, 123.21, 120.4, 119.5, 111.4, 111.3, 98.7, 98.1, 54.3, 45.2, 40.5, 37.1, 34.5, 33.0, 32.9, 26.1, 25.93, 25.90. HRMS (ESI) calcd for C<sub>27</sub>H<sub>30</sub>NO<sub>3</sub>S<sup>+</sup> [M+H]<sup>+</sup> 448.1941, found 448.1949. HPLC analysis: **3ha**, 95% ee (AD-H, 5% isopropanol/hexane, 1.0 mL/min, UV: 254 nm), *t<sub>R</sub>* = 19.553 min (minor), 21.077 min (major).



**(R)-3-((S)-3-((tert-butyl dimethylsilyl)oxy)prop-1-en-1-ylidene)-1-(methylsulfonyl)-5-phenyl-2,3,4,5-tetrahydro-1H-benzofuro[3,2-b]azepine (3ia)**

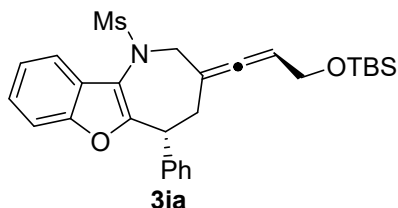

Prepared according to the general procedure as described above in 73% yield (37.2 mg), >20:1 dr and 99% ee. It was purified by flash chromatography 4% EtOAc/PE) to afford a viscous liquid;  $[\alpha]_D^{25} = -58.5$  ( $c$  1.50,  $\text{CH}_2\text{Cl}_2$ );  $^1\text{H NMR}$  (800 MHz,  $\text{CDCl}_3$ )  $\delta$  7.67 – 7.58 (m, 1H), 7.37 – 7.18 (m, 8), 5.27 – 5.18 (m, 1H), 4.69 – 4.55 (m, 1), 4.41 (dd,  $J = 8.6, 4.9$  Hz, 1H), 4.12 (d,  $J = 5.9$  Hz, 3H), 3.04 – 2.99 (m, 1H), 2.75 (s, 4), 0.81 (s, 9), -0.01 (d,  $J = 14.1$  Hz, 6).  $^{13}\text{C NMR}$  (201 MHz,  $\text{CDCl}_3$ )  $\delta$  202.2, 154.3, 153.3, 140.5, 128.7, 127.8, 127.3, 126.6, 124.7, 123.3, 120.3, 119.5, 111.4, 99.1, 93.5, 61.1, 53.5, 45.2, 40.6, 34.3, 25.9, 25.8, 18.3, -5.09, -5.12. HRMS (ESI) calcd for  $\text{C}_{28}\text{H}_{36}\text{NO}_4\text{SSi}^+$   $[\text{M}+\text{H}]^+$  510.2129, found 510.2132. HPLC analysis: **3ia**, 99% ee (IA, 2% isopropanol/hexane, 1.0 mL/min, UV: 254 nm),  $t_{\text{R}} = 15.677$  min (minor), 28.797 min (major).

**(R)-1-(methylsulfonyl)-5-phenyl-3-((S)-3-phenylprop-1-en-1-ylidene)-2,3,4,5-tetrahydro-1H-benzofuro[3,2-b]azepine (3ja)**

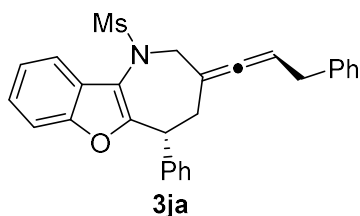

Prepared according to the general procedure as described above in 77% yield (35.0 mg), 9:1 dr and 95% ee. It was purified by flash chromatography 4% EtOAc/PE) to afford a white solid. mp = 68 – 70°C;  $[\alpha]_D^{25} = -80.3$  ( $c$  1.08,  $\text{CH}_2\text{Cl}_2$ );  $^1\text{H NMR}$  (800 MHz,  $\text{CDCl}_3$ )  $\delta$  7.69 – 7.62 (m, 1H), 7.40 – 7.04 (m, 13H), 5.42 (tdd,  $J = 6.5, 4.6, 2.9$  Hz, 1H), 4.63 (s, 1H), 4.17 – 3.98 (m, 2H), 3.36 – 3.23 (m, 2H), 2.96 – 2.88 (m, 1H), 2.82 (s, 3H), 2.68 (dd,  $J = 13.9, 5.0$  Hz, 1H).  $^{13}\text{C NMR}$  (201 MHz,  $\text{CDCl}_3$ )  $\delta$  203.5, 154.3, 153.3, 140.7, 139.4, 128.8, 128.7, 128.6, 128.4, 128.3, 127.8, 127.7, 127.3, 127.2, 126.6, 126.5, 124.6, 123.3, 123.2, 120.1, 111.5, 111.4, 98.8, 93.1, 53.4, 45.7, 40.6, 35.1, 34.7. HRMS (ESI) calcd for  $\text{C}_{28}\text{H}_{26}\text{NO}_3\text{S}^+$   $[\text{M}+\text{H}]^+$  456.1628, found 456.1620. HPLC analysis: **3ja**, 95% ee (OX-H, 5% isopropanol/hexane, 1.0 mL/min, UV: 254 nm),  $t_{\text{R}} = 29.707$  min (minor), 55.623 min (major).

**(R)-3-((S)-but-1-en-1-ylidene)-5-(2-fluorophenyl)-1-(methylsulfonyl)-2,3,4,5-tetrahydro-1H-benzofuro[3,2-b]azepine (3bb)**

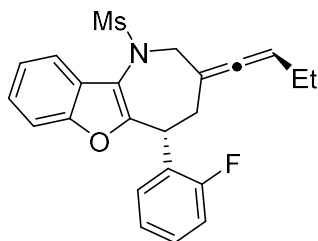

**3bb**

Prepared according to the general procedure as described above in 76% yield (31.2 mg), >20:1 dr and 95% ee. It was purified by flash chromatography 4% EtOAc/PE) to afford a viscous liquid;  $[\alpha]_D^{25} = -69.3$  (*c* 1.23, CH<sub>2</sub>Cl<sub>2</sub>); <sup>1</sup>H NMR (800 MHz, CDCl<sub>3</sub>)  $\delta$  7.68 (dd, *J* = 7.4, 1.6 Hz, 1H), 7.36 – 7.03 (m, 7H), 5.29 – 5.19 (m, 1H), 4.68 (dd, *J* = 10.1, 5.5 Hz, 1H), 4.46 (d, *J* = 113.6 Hz, 2H), 3.16 (s, 3H), 2.98 – 2.81 (m, 2H), 2.09 – 1.91 (m, 2H), 0.93 (t, *J* = 7.4 Hz, 3H). <sup>13</sup>C NMR (201 MHz, CDCl<sub>3</sub>)  $\delta$  201.9, 160.5 (d, *J* = 246.2 Hz), 153.4, 152.9, 129.6 (d, *J* = 4.1 Hz), 128.9 (d, *J* = 8.2 Hz), 127.6 (d, *J* = 13.8 Hz), 126.4, 124.7, 124.5 (d, *J* = 3.4 Hz), 123.2, 120.0, 119.9, 115.6 (d, *J* = 22.1 Hz), 111.5, 98.2, 95.0, 54.0, 40.8, 40.1, 34.2, 21.9, 13.3. HRMS (ESI) calcd for C<sub>23</sub>H<sub>23</sub>FNO<sub>3</sub>S<sup>+</sup> [M+H]<sup>+</sup> 412.1377, found 412.1385. HPLC analysis: **3bb**, 95% ee (IA, 5% isopropanol/hexane, 1.0 mL/min, UV: 254 nm), *t<sub>R</sub>* = 9.917 min (minor), 14.07 min (major).

**(R)-3-((S)-but-1-en-1-ylidene)-5-(3-fluorophenyl)-1-(methylsulfonyl)-2,3,4,5-tetrahydro-1H-benzofuro[3,2-b]azepine (3bc)**

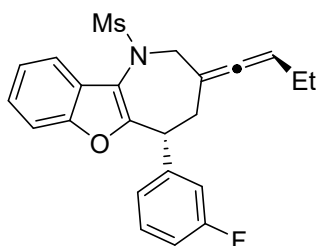

**3bc**

Prepared according to the general procedure as described above in 70% yield (28.8 mg), 15.5:1 dr and 96% ee. It was purified by flash chromatography 4% EtOAc/PE) to afford a viscous liquid;  $[\alpha]_D^{25} = -51.0$  (*c* 0.98, CH<sub>2</sub>Cl<sub>2</sub>); <sup>1</sup>H NMR (800 MHz, CDCl<sub>3</sub>)  $\delta$  7.61 (dd, *J* = 6.0, 3.1 Hz, 1H), 7.34 – 7.15 (m, 4H), 7.02 – 6.84 (m, 3H), 5.18 (tt, *J* = 6.5, 2.2 Hz, 1H), 4.58 (d, *J* = 15.5 Hz, 1H), 4.37 (dd, *J* = 8.6, 5.1 Hz, 1H), 4.08 (d, *J* = 15.2 Hz, 1H), 3.00 – 2.69 (m, 5H), 2.03 – 1.84 (m, 2H), 0.88 (t, *J* = 7.4 Hz, 3H). <sup>13</sup>C NMR (201 MHz, CDCl<sub>3</sub>)  $\delta$  202.8, 162.9 (d, *J* = 246.6 Hz), 153.66, 153.3, 143.1 (d, *J* = 6.9 Hz), 130.2 (d, *J* = 8.2 Hz), 126.5, 124.8, 123.6 (d, *J* = 2.9 Hz), 123.3, 120.4, 119.6, 114.9 (d, *J* = 22.1 Hz), 114.1 (d, *J* = 20.8 Hz), 111.5, 97.8, 94.7, 54.0, 45.1, 40.7, 34.5, 21.9, 21.8, 13.2. HRMS (ESI) calcd for C<sub>23</sub>H<sub>23</sub>FNO<sub>3</sub>S<sup>+</sup> [M+H]<sup>+</sup> 412.1377, found 412.1368. HPLC analysis: **3bc**, 96% ee (IA, 5% isopropanol/hexane, 1.0 mL/min, UV: 254 nm), *t<sub>R</sub>* = 12.157 min (minor), 20.637 min (major).

**(R)-3-((S)-but-1-en-1-ylidene)-5-(4-fluorophenyl)-1-(methylsulfonyl)-2,3,4,5-tetrahydro-1H-benzofuro[3,2-b]azepine (3bd)**

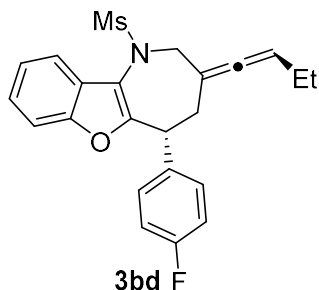

Prepared according to the general procedure as described above in 88% yield (36.1 mg), 11.5:1 dr and 95% ee. It was purified by flash chromatography 4% EtOAc/PE) to afford a viscous liquid;  $[\alpha]_D^{25} = -53.8$  (*c* 1.90, CH<sub>2</sub>Cl<sub>2</sub>); <sup>1</sup>H NMR (800 MHz, CDCl<sub>3</sub>)  $\delta$  7.71 – 7.60 (m, 1H), 7.40 – 7.21 (m, 5H), 7.11 – 6.92 (m, 2H), 5.34 – 5.18 (m, 1H), 4.75 – 4.51 (m, 1H), 4.41 (dd, *J* = 8.9, 5.2 Hz, 1H), 4.25 – 4.10 (m, 1H), 3.02 – 2.72 (m, 5H), 2.01 (qd, *J* = 7.4, 6.0 Hz, 2H), 0.94 (t, *J* = 7.4 Hz, 3H). <sup>13</sup>C NMR (201 MHz, CDCl<sub>3</sub>)  $\delta$  202.7, 161.9 (d, *J* = 245.9 Hz), 154.2, 153.3, 136.4 (d, *J* = 3.1 Hz), 129.5, 129.4 (d, *J* = 7.7 Hz), 126.5, 124.7, 123.3, 120.2, 119.4, 115.5 (d, *J* = 21.4 Hz), 111.5, 97.9, 94.7, 54.0, 53.9, 44.9, 40.8, 34.8, 21.9, 21.8, 13.5, 13.2. HRMS (ESI) calcd for C<sub>23</sub>H<sub>23</sub>FNO<sub>3</sub>S<sup>+</sup> [M+H]<sup>+</sup> 412.1377, found 412.1372. HPLC analysis: **3bd**, 95% ee (AD-H, 5% isopropanol/hexane, 1.0 mL/min, UV: 254 nm), *t*<sub>R</sub> = 16.15 min (minor), 31.17 min (major).

**(R)-3-((S)-but-1-en-1-ylidene)-5-(2-chlorophenyl)-1-(methylsulfonyl)-2,3,4,5-tetrahydro-1H-benzofuro[3,2-b]azepine (3be)**

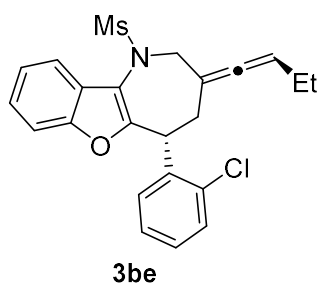

Prepared according to the general procedure as described above in 91% yield (38.8 mg), >20:1 dr and 98% ee. It was purified by flash chromatography 4% EtOAc/PE) to afford a white solid. mp = 62 – 64°C;  $[\alpha]_D^{25} = -81.0$  (*c* 1.44, CH<sub>2</sub>Cl<sub>2</sub>); <sup>1</sup>H NMR (800 MHz, CDCl<sub>3</sub>)  $\delta$  7.65 (dd, *J* = 7.6, 1.6 Hz, 1H), 7.49 – 7.37 (m, 1H), 7.35 – 7.11 (m, 6H), 5.26 (s, 1H), 4.85 (dd, *J* = 11.0, 5.0 Hz, 1H), 4.49 (d, *J* = 122.0 Hz, 2H), 3.21 (s, 3H), 3.00 – 2.66 (m, 2H), 2.04 – 1.87 (m, 2H), 0.93 (t, *J* = 7.4 Hz, 3H). <sup>13</sup>C NMR (201 MHz, CDCl<sub>3</sub>)  $\delta$  201.7, 153.6, 153.5, 138.2, 133.3, 129.8, 129.7, 129.5, 128.6, 128.5, 127.4, 126.3, 124.7, 123.3, 120.0, 119.7, 111.6, 111.5, 98.3, 95.3, 53.8, 43.7, 41.1, 33.7, 21.9, 13.3. HRMS (ESI) calcd for C<sub>23</sub>H<sub>23</sub>ClNO<sub>3</sub>S<sup>+</sup> [M+H]<sup>+</sup> 428.1082, found 428.1081. HPLC analysis: **3be**, 98% ee (IA, 5% isopropanol/hexane, 1.0 mL/min, UV: 254 nm), *t*<sub>R</sub> = 10.177 min (minor), 12.233 min (major).

**(R)-3-((S)-but-1-en-1-ylidene)-5-(3-chlorophenyl)-1-(methylsulfonyl)-2,3,4,5-tetrahydro-1H-benzofuro[3,2-b]azepine (3bf)**

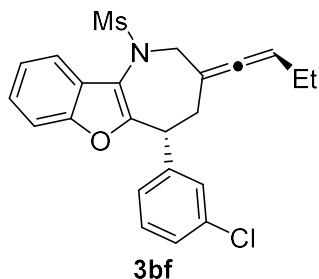

Prepared according to the general procedure as described above in 76% yield (32.5 mg), 11:1 dr and 95% ee. It was purified by flash chromatography 4% EtOAc/PE) to afford a white solid. mp = 118 – 120°C;  $[\alpha]_D^{25} = -67.2$  (*c* 1.25, CH<sub>2</sub>Cl<sub>2</sub>); <sup>1</sup>H NMR (800 MHz, CDCl<sub>3</sub>) δ 7.67 – 7.52 (m, 1H), 7.38 – 7.04 (m, 7H), 5.19 (qd, *J* = 6.1, 5.0, 2.1 Hz, 1H), 4.67 – 4.45 (m, 1H), 4.34 (dd, *J* = 8.7, 5.1 Hz, 1H), 4.16 – 3.97 (m, 1H), 2.99 – 2.65 (m, 5H), 2.00 – 1.84 (m, 2H), 0.88 (t, *J* = 7.4 Hz, 3H). <sup>13</sup>C NMR (201 MHz, CDCl<sub>3</sub>) δ 202.8, 153.6, 153.3, 142.6, 134.5, 130.0, 129.9, 128.0, 127.9, 127.4, 127.3, 126.48, 126.47, 126.2, 124.8, 123.3, 120.3, 119.6, 111.5, 97.7, 94.8, 54.0, 45.2, 40.74, 40.72, 34.5, 21.8, 13.3. HRMS (ESI) calcd for C<sub>23</sub>H<sub>23</sub>ClNO<sub>3</sub>S<sup>+</sup> [M+H]<sup>+</sup> 428.1082, found 428.1084. HPLC analysis: **3bf**, 95% ee (AD-H, 5% isopropanol/hexane, 1.0 mL/min, UV: 254 nm), *t<sub>R</sub>* = 13.467 min (minor), 22.813 min (major).

**(R)-3-((S)-but-1-en-1-ylidene)-5-(4-chlorophenyl)-1-(methylsulfonyl)-2,3,4,5-tetrahydro-1H-benzofuro[3,2-b]azepine (3bg)**

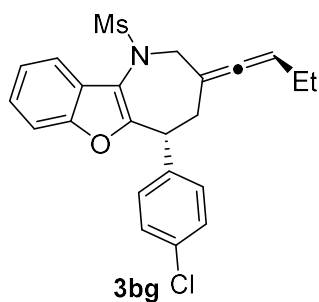

Prepared according to the general procedure as described above in 76% yield (32.5 mg), 11.5:1 dr and 95% ee.. It was purified by flash chromatography 4% EtOAc/PE) to afford a white solid. mp = 59 – 62°C;  $[\alpha]_D^{25} = -78.5$  (*c* 1.34, CH<sub>2</sub>Cl<sub>2</sub>); <sup>1</sup>H NMR (800 MHz, CDCl<sub>3</sub>) δ 7.67 (dd, *J* = 6.3, 2.9 Hz, 1H), 7.46 – 7.14 (m, 8H), 5.25 (tt, *J* = 6.1, 2.6 Hz, 1H), 4.64 (d, *J* = 14.5 Hz, 1H), 4.40 (dd, *J* = 9.0, 5.1 Hz, 1H), 4.17 (d, *J* = 14.3 Hz, 1H), 3.07 – 2.67 (m, 5H), 2.05 – 1.91 (m, 2H), 0.94 (t, *J* = 7.4 Hz, 3H). <sup>13</sup>C NMR (201 MHz, CDCl<sub>3</sub>) δ 202.6, 153.9, 153.3, 139.2, 133.0, 130.9, 129.3, 129.2, 128.9, 128.8, 126.5, 124.8, 123.3, 120.2, 119.5, 111.5, 97.9, 94.8, 94.7, 53.9, 45.1, 40.8, 34.7, 21.8, 13.2. HRMS (ESI) calcd for C<sub>23</sub>H<sub>23</sub>ClNO<sub>3</sub>S<sup>+</sup> [M+H]<sup>+</sup> 428.1082, found 428.1073. HPLC analysis: **3bg**, 95% ee (AD-H, 5% isopropanol/hexane, 1.0 mL/min, UV: 254 nm), *t<sub>R</sub>* = 19.493 min (minor), 33.68 min (major).

**(R)-5-(2-bromophenyl)-3-((S)-but-1-en-1-ylidene)-1-(methylsulfonyl)-2,3,4,5-tetrahydro-1H-benzofuro[3,2-b]azepine (3bh)**

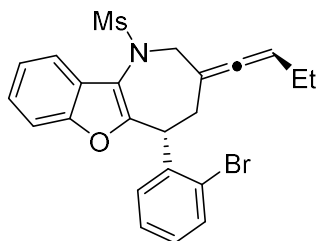

**3bh**

Prepared according to the general procedure as described above in 90% yield (42.3 mg), >20:1 dr and 98% ee. It was purified by flash chromatography 4% EtOAc/PE to afford a white solid. mp = 66 – 68°C;  $[\alpha]_D^{25} = -71.6$  (*c* 1.76, CH<sub>2</sub>Cl<sub>2</sub>); <sup>1</sup>H NMR (800 MHz, CDCl<sub>3</sub>) δ 7.73 – 7.55 (m, 2H), 7.40 – 7.10 (m, 6H), 5.27 (s, 1H), 4.83 (dd, *J* = 11.1, 5.0 Hz, 1H), 4.49 (d, *J* = 126.1 Hz, 2H), 3.22 (s, 3H), 2.93 (ddd, *J* = 13.7, 5.0, 1.1 Hz, 1H), 2.74 (ddd, *J* = 13.5, 11.0, 2.2 Hz, 1H), 1.98 (qd, *J* = 7.4, 6.1 Hz, 2H), 1.02 – 0.87 (m, 3H). <sup>13</sup>C NMR (201 MHz, CDCl<sub>3</sub>) δ 201.3, 153.3, 153.1, 139.5, 132.7, 132.6, 129.2, 128.5, 127.7, 125.9, 124.4, 123.6, 122.9, 119.6, 119.2, 111.3, 97.9, 94.9, 53.4, 46.0, 40.8, 33.6, 21.5, 12.9. HRMS (ESI) calcd for C<sub>23</sub>H<sub>23</sub>BrNO<sub>3</sub>S<sup>+</sup> [M+H]<sup>+</sup> 472.0577, found 472.0565. HPLC analysis: **3bh**, 98% ee (AD-H, 5% isopropanol/hexane, 1.0 mL/min, UV: 254 nm), *t<sub>R</sub>* = 12.39 min (major), 13.243 min (minor).

**(R)-5-(3-bromophenyl)-3-((S)-but-1-en-1-ylidene)-1-(methylsulfonyl)-2,3,4,5-tetrahydro-1H-benzofuro[3,2-b]azepine (3bi)**

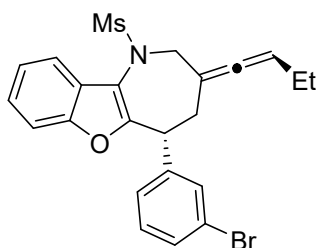

**3bi**

Prepared according to the general procedure as described above in 78% yield (36.7 mg), 9:1 dr and 95% ee. It was purified by flash chromatography 4% EtOAc/PE to afford a white solid. mp = 107 – 110°C;  $[\alpha]_D^{25} = -57.5$  (*c* 1.06, CH<sub>2</sub>Cl<sub>2</sub>); <sup>1</sup>H NMR (800 MHz, CDCl<sub>3</sub>) δ 7.74 – 7.63 (m, 1H), 7.55 – 7.02 (m, 7H), 5.28 (ddq, *J* = 6.5, 4.4, 2.1 Hz, 1H), 4.66 (d, *J* = 14.7 Hz, 1H), 4.49 – 4.36 (m, 1H), 4.15 (d, *J* = 14.9 Hz, 1H), 3.11 – 2.73 (m, 5H), 2.09 – 1.91 (m, 2H), 0.95 (t, *J* = 7.4 Hz, 3H). <sup>13</sup>C NMR (201 MHz, CDCl<sub>3</sub>) δ 202.8, 153.6, 153.3, 142.9, 130.9, 130.4, 130.33, 130.31, 130.3, 126.7, 126.6, 126.5, 124.8, 123.3, 122.7, 120.3, 119.6, 111.5, 97.7, 94.8, 54.0, 45.2, 40.7, 34.5, 21.8, 13.3. HRMS (ESI) calcd for C<sub>23</sub>H<sub>23</sub>BrNO<sub>3</sub>S<sup>+</sup> [M+H]<sup>+</sup> 472.0577, found 472.0577. HPLC analysis: **3bi**, 95% ee (AD-H, 5% isopropanol/hexane, 1.0 mL/min, UV: 254 nm), *t<sub>R</sub>* = 13.92 min (minor), 21.70 min (major).

**(R)-5-(4-bromophenyl)-3-((S)-but-1-en-1-ylidene)-1-(methylsulfonyl)-2,3,4,5-tetrahydro-1H-benzofuro[3,2-b]azepine (3bj)**

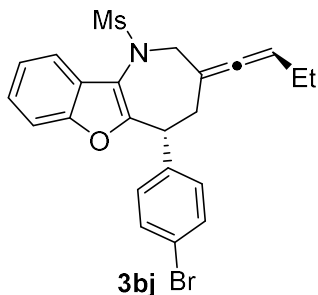

Prepared according to the general procedure as described above in 78% yield (36.7 mg), 11.5:1 dr and 95% ee. It was purified by flash chromatography 4% EtOAc/PE) to afford a viscous liquid;  $[\alpha]_D^{25} = -74.4$  (*c* 1.41, CH<sub>2</sub>Cl<sub>2</sub>); <sup>1</sup>H NMR (800 MHz, CDCl<sub>3</sub>) δ 7.72 – 7.63 (m, 1H), 7.49 – 7.11 (m, 8H), 5.25 (dt, *J* = 6.7, 4.0 Hz, 1H), 4.63 (d, *J* = 15.4 Hz, 1H), 4.38 (dd, *J* = 9.0, 5.2 Hz, 1H), 4.17 (d, *J* = 12.3 Hz, 1H), 3.03 – 2.71 (m, 6H), 2.08 – 1.90 (m, 2H), 0.94 (t, *J* = 7.4 Hz, 3H). <sup>13</sup>C NMR (201 MHz, CDCl<sub>3</sub>) δ 202.6, 153.3, 139.7, 131.8, 131.7, 129.63, 129.60, 126.5, 124.8, 123.3, 121.1, 120.2, 119.6, 111.5, 97.9, 94.8, 53.9, 45.2, 40.9, 34.6, 21.8, 13.2. HRMS (ESI) calcd for C<sub>23</sub>H<sub>23</sub>BrNO<sub>3</sub>S<sup>+</sup> [M+H]<sup>+</sup> 472.0577, found 472.0567. HPLC analysis: **3bj**, 95% ee (AD-H, 5% isopropanol/hexane, 1.0 mL/min, UV: 254 nm), *t<sub>R</sub>* = 21.52 min (minor), 35.09 min (major).

**(R)-3-((S)-but-1-en-1-ylidene)-1-(methylsulfonyl)-5-(o-tolyl)-2,3,4,5-tetrahydro-1H-benzofuro[3,2-b]azepine (3bk)**

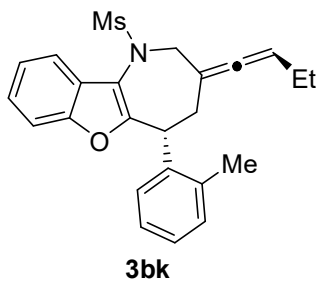

Prepared according to the general procedure as described above in 93% yield (37.9 mg), >20:1 dr and 98% ee. It was purified by flash chromatography 4% EtOAc/PE) to afford a white solid. mp = 66 – 70°C;  $[\alpha]_D^{25} = -74.9$  (*c* 1.50, CH<sub>2</sub>Cl<sub>2</sub>); <sup>1</sup>H NMR (800 MHz, CDCl<sub>3</sub>) δ 7.65 (dd, *J* = 7.7, 1.4 Hz, 1H), 7.38 – 7.03 (m, 7H), 5.39 – 5.19 (m, 1H), 4.66 – 4.30 (m, 3H), 3.20 (s, 3H), 2.87 – 2.75 (m, 2H), 2.44 (s, 3H), 2.05 – 1.92 (m, 2H), 0.94 (t, *J* = 7.4 Hz, 3H). <sup>13</sup>C NMR (201 MHz, CDCl<sub>3</sub>) δ 201.5, 154.6, 153.4, 139.0, 135.3, 130.7, 127.8, 127.2, 126.6, 126.4, 124.5, 123.2, 119.7, 119.6, 111.6, 98.9, 95.2, 53.8, 43.6, 40.9, 34.5, 21.9, 19.4, 13.4. HRMS (ESI) calcd for C<sub>24</sub>H<sub>26</sub>NO<sub>3</sub>S<sup>+</sup> [M+H]<sup>+</sup> 408.1628, found 408.1634. HPLC analysis: **3bk**, 98% ee (IA, 5% isopropanol/hexane, 1.0 mL/min, UV: 254 nm), *t<sub>R</sub>* = 9.607 min (minor), 15.77 min (major).

**(*R*)-3-((*S*)-but-1-en-1-ylidene)-1-(methylsulfonyl)-5-(*m*-tolyl)-2,3,4,5-tetrahydro-1*H*-benzofuro[3,2-*b*]azepine (3bl)**

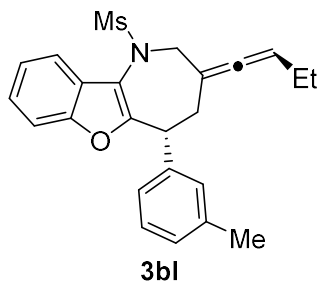

Prepared according to the general procedure as described above in 88% yield (35.8 mg), 12:1 dr and 93% ee. It was purified by flash chromatography 4% EtOAc/PE) to afford a white solid. mp = 56 – 58°C;  $[\alpha]_{\text{D}}^{25} = -67.5$  (*c* 1.22, CH<sub>2</sub>Cl<sub>2</sub>); <sup>1</sup>H NMR (800 MHz, CDCl<sub>3</sub>) δ 7.67 – 7.57 (m, 1H), 7.37 – 6.93 (m, 7H), 5.16 (tt, *J* = 6.4, 2.1 Hz, 1H), 4.57 (d, *J* = 14.1 Hz, 1H), 4.34 (dd, *J* = 8.7, 5.1 Hz, 1H), 4.14 – 3.98 (m, 1H), 3.01 – 2.64 (m, 5H), 2.24 (s, 3H), 2.05 – 1.85 (m, 2H), 0.88 (t, *J* = 7.4 Hz, 3H). <sup>13</sup>C NMR (201 MHz, CDCl<sub>3</sub>) δ 202.8, 154.5, 153.3, 140.5, 138.3, 128.6, 128.5, 127.9, 126.7, 124.8, 124.6, 123.2, 120.4, 119.4, 111.4, 98.1, 94.4, 54.1, 45.3, 40.4, 34.6, 21.8, 21.6, 13.3. HRMS (ESI) calcd for C<sub>24</sub>H<sub>26</sub>NO<sub>3</sub>S<sup>+</sup> [M+H]<sup>+</sup> 408.1628, found 408.1623. HPLC analysis: **3bl**, 93% ee (AD-H, 5% isopropanol/hexane, 1.0 mL/min, UV: 254 nm), *t<sub>R</sub>* = 11.117 min (minor), 17.733 min (major).

**(*R*)-3-((*S*)-but-1-en-1-ylidene)-1-(methylsulfonyl)-5-(*p*-tolyl)-2,3,4,5-tetrahydro-1*H*-benzofuro[3,2-*b*]azepine (3bm)**

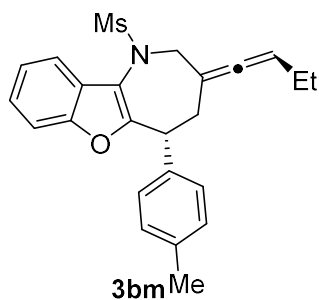

Prepared according to the general procedure as described above in 73% yield (29.7 mg), 13:1 dr and 95% ee. It was purified by flash chromatography 4% EtOAc/PE) to afford a viscous liquid;  $[\alpha]_{\text{D}}^{25} = -61.4$  (*c* 0.70, CH<sub>2</sub>Cl<sub>2</sub>); <sup>1</sup>H NMR (800 MHz, CDCl<sub>3</sub>) δ 7.77 – 7.64 (m, 1H), 7.48 – 7.03 (m, 7H), 5.24 (tt, *J* = 6.2, 2.1 Hz, 1H), 4.64 (d, *J* = 15.2 Hz, 1H), 4.42 (dd, *J* = 8.7, 5.0 Hz, 1H), 4.14 (d, *J* = 15.0 Hz, 1H), 3.12 – 2.70 (m, 5H), 2.32 (s, 3H), 2.02 (qd, *J* = 7.3, 5.8 Hz, 2H), 0.95 (t, *J* = 7.4 Hz, 3H). <sup>13</sup>C NMR (201 MHz, CDCl<sub>3</sub>) δ 202.1, 153.8, 152.4, 136.8, 136.0, 128.6, 128.5, 126.9, 126.8, 125.9, 123.8, 122.4, 119.6, 118.5, 110.6, 97.3, 93.5, 53.3, 44.2, 39.6, 33.9, 21.0, 20.3, 12.5. HRMS (ESI) calcd for C<sub>24</sub>H<sub>26</sub>NO<sub>3</sub>S<sup>+</sup> [M+H]<sup>+</sup> 408.1628, found 408.1616. HPLC analysis: **3bm**, 95% ee (IA, 5% isopropanol/hexane, 1.0 mL/min, UV: 254 nm), *t<sub>R</sub>* = 13.203 min (minor), 27.423 min (major).

**(*R*)-3-((*S*)-but-1-en-1-ylidene)-5-(2-methoxyphenyl)-1-(methylsulfonyl)-2,3,4,5-tetrahydro-1*H*-benzofuro[3,2-*b*]azepine (3bn)**

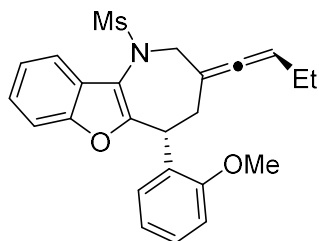

**3bn**

Prepared according to the general procedure as described above in 60% yield (25.4 mg), >20:1 dr and 95% ee. It was purified by flash chromatography 4% EtOAc/PE) to afford a white solid. mp = 60 – 62°C;  $[\alpha]_D^{25} = -74.9$  (*c* 0.90, CH<sub>2</sub>Cl<sub>2</sub>); <sup>1</sup>H NMR (800 MHz, CDCl<sub>3</sub>) δ 7.76 – 7.56 (m, 1H), 7.34 – 6.84 (m, 7H), 5.27 – 5.15 (m, 1H), 4.77 (dd, *J* = 10.5, 4.9 Hz, 1H), 4.46 (d, *J* = 56.0 Hz, 2H), 3.84 (s, 3H), 3.16 (s, 3H), 2.94 – 2.72 (m, 2H), 2.03 – 1.92 (m, 2H), 0.94 (t, *J* = 7.4 Hz, 3H). <sup>13</sup>C NMR (201 MHz, CDCl<sub>3</sub>) δ 201.8, 156.8, 154.3, 153.3, 132.3, 130.9, 128.9, 128.7, 128.4, 128.4, 126.6, 124.4, 123.1, 120.8, 120.0, 119.7, 111.4, 110.8, 110.7, 98.7, 94.6, 65.6, 55.6, 54.1, 40.5, 33.9, 21.9, 19.2, 13.8, 13.4. HRMS (ESI) calcd for C<sub>24</sub>H<sub>26</sub>NO<sub>4</sub>S<sup>+</sup> [M+H]<sup>+</sup> 424.1577, found 424.1575. HPLC analysis: **3bn**, 95% ee (AD-H, 5% isopropanol/hexane, 1.0 mL/min, UV: 254 nm), *t<sub>R</sub>* = 15.70 min (minor), 21.12 min (major).

**(*R*)-3-((*S*)-but-1-en-1-ylidene)-5-(3-methoxyphenyl)-1-(methylsulfonyl)-2,3,4,5-tetrahydro-1*H*-benzofuro[3,2-*b*]azepine (3bo)**

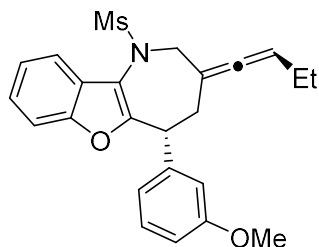

**3bo**

Prepared according to the general procedure as described above in 99% yield (41.7 mg), 15.5:1 dr and 95% ee.. It was purified by flash chromatography 4% EtOAc/PE) to afford a white solid. mp = 44 – 46°C;  $[\alpha]_D^{25} = -67.4$  (*c* 1.91, CH<sub>2</sub>Cl<sub>2</sub>); <sup>1</sup>H NMR (800 MHz, CDCl<sub>3</sub>) δ 7.67 – 7.53 (m, 1H), 7.39 – 7.10 (m, 4H), 6.87 – 6.66 (m, 3H), 5.18 (tdt, *J* = 6.3, 4.7, 2.3 Hz, 1H), 4.68 – 4.49 (m, 1H), 4.32 (dd, *J* = 8.9, 5.2 Hz, 1H), 4.13 – 3.95 (m, 1H), 3.67 (s, 3H), 3.01 – 2.66 (m, 5H), 1.93 (qdd, *J* = 7.3, 6.0, 1.2 Hz, 2H), 0.86 (t, *J* = 7.4 Hz, 3H). <sup>13</sup>C NMR (201 MHz, CDCl<sub>3</sub>) δ 202.8, 159.9, 154.4, 153.3, 142.2, 129.7, 126.6, 124.6, 123.2, 120.2, 120.1, 119.3, 113.5, 112.7, 111.5, 98.1, 94.5, 55.3, 55.2, 54.1, 45.5, 40.7, 34.6, 21.8, 13.2. HRMS (ESI) calcd for C<sub>24</sub>H<sub>26</sub>NO<sub>4</sub>S<sup>+</sup> [M+H]<sup>+</sup> 424.1577, found 424.1580. HPLC analysis: **3bo**, 95% ee (AD-H, 5% isopropanol/hexane, 1.0 mL/min, UV: 254 nm), *t<sub>R</sub>* = 18.717min (minor), 30.483min (major).



**(R)-3-((S)-but-1-en-1-ylidene)-5-(4-methoxyphenyl)-1-(methylsulfonyl)-2,3,4,5-tetrahydro-1H-benzofuro[3,2-b]azepine (3bp)**

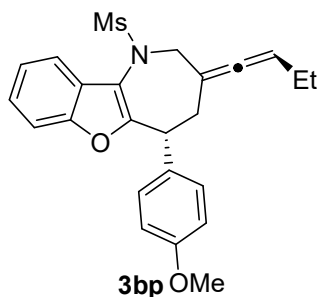

Prepared according to the general procedure as described above in 71% yield (30.0 mg), >20:1 dr and 98% ee. It was purified by flash chromatography 4% EtOAc/PE) to afford a white solid. mp = 52 – 54°C;  $[\alpha]_D^{25} = -77.9$  (*c* 1.18, CH<sub>2</sub>Cl<sub>2</sub>); <sup>1</sup>H NMR (800 MHz, CDCl<sub>3</sub>) δ 7.75 – 7.64 (m, 1H), 7.41 – 7.13 (m, 5H), 6.92 – 6.76 (m, 2H), 5.24 (tt, *J* = 6.3, 2.0 Hz, 1H), 4.64 (d, *J* = 14.6 Hz, 1H), 4.41 (dd, *J* = 8.5, 5.0 Hz, 1H), 4.13 (d, *J* = 14.8 Hz, 1H), 3.78 (s, 3H), 3.04 – 2.71 (m, 5H), 2.02 (qd, *J* = 7.4, 6.0 Hz, 2H), 0.95 (t, *J* = 7.4 Hz, 3H). <sup>13</sup>C NMR (201 MHz, CDCl<sub>3</sub>) δ 202.8, 158.6, 154.8, 153.2, 132.7, 128.8, 126.7, 124.6, 123.2, 120.4, 119.2, 114.0, 113.9, 111.4, 98.0, 94.3, 55.3, 54.1, 44.5, 40.5, 34.7, 21.8, 13.3. HRMS (ESI) calcd for C<sub>24</sub>H<sub>26</sub>NO<sub>4</sub>S<sup>+</sup> [M+H]<sup>+</sup> 424.1577, found 424.1589. HPLC analysis: **3bp**, 98% ee (AS-H, 5% isopropanol/hexane, 1.0 mL/min, UV: 254 nm), *t<sub>R</sub>* = 31.56 min (major), 69.513 min (minor).

**(R)-3-((S)-but-1-en-1-ylidene)-1-(methylsulfonyl)-5-(naphthalen-1-yl)-2,3,4,5-tetrahydro-1H-benzofuro[3,2-b]azepine (3bq)**

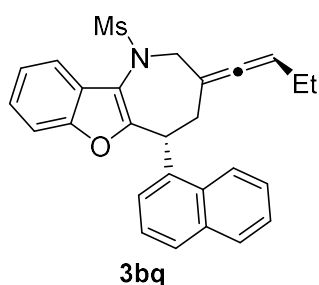

Prepared according to the general procedure as described above in 84% yield (37.2 mg), >20:1 dr and 97% ee.. It was purified by flash chromatography 4% EtOAc/PE) to afford a white solid. mp = 62 – 64°C;  $[\alpha]_D^{25} = -141.0$  (*c* 2.50, CH<sub>2</sub>Cl<sub>2</sub>); <sup>1</sup>H NMR (800 MHz, CDCl<sub>3</sub>) δ 8.09 (d, *J* = 8.5 Hz, 1H), 7.97 – 7.86 (m, 1H), 7.79 (d, *J* = 8.2 Hz, 1H), 7.69 (dt, *J* = 7.9, 1.0 Hz, 1H), 7.59 – 7.18 (m, 7H), 5.27 (s, 1H), 5.17 (dd, *J* = 11.0, 5.2 Hz, 1H), 4.73 – 4.36 (m, 2H), 3.23 (s, 3H), 3.11 – 2.87 (m, 2H), 2.09 – 1.93 (m, 2H), 0.95 (t, *J* = 7.4 Hz, 3H). <sup>13</sup>C NMR (201 MHz, CDCl<sub>3</sub>) δ 201.6, 154.4, 153.5, 136.7, 134.1, 131.0, 129.2, 129.2, 127.9, 126.6, 126.5, 125.74, 125.72, 125.6, 125.6, 124.6, 123.2, 122.5, 120.1, 119.7, 111.6, 111.5, 98.8, 95.3, 53.9, 43.1, 41.0, 34.8, 21.9, 13.4. HRMS (ESI) calcd for C<sub>27</sub>H<sub>26</sub>NO<sub>3</sub>S<sup>+</sup> [M+H]<sup>+</sup> 444.1628, found 444.1630. HPLC analysis: **3bq**, 97% ee (IC, 5% isopropanol/hexane, 1.0 mL/min, UV: 254 nm), *t<sub>R</sub>* = 24.153 min (major), 34.833 min (minor).

**(R)-5-([1,1'-biphenyl]-4-yl)-3-((S)-but-1-en-1-ylidene)-1-(methylsulfonyl)-2,3,4,5-tetrahydro-1H-benzofuro[3,2-b]azepine (3br)**

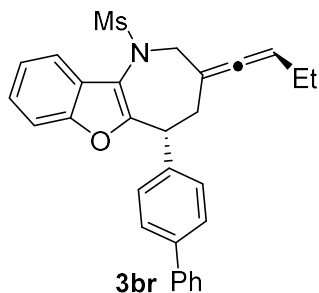

Prepared according to the general procedure as described above in 97% yield (45.4 mg), 15.5:1 dr and 96% ee. It was purified by flash chromatography 4% EtOAc/PE) to afford a white solid. mp = 80 – 82°C;  $[\alpha]_D^{25} = -112.8$  (*c* 1.30, CH<sub>2</sub>Cl<sub>2</sub>); <sup>1</sup>H NMR (800 MHz, CDCl<sub>3</sub>) δ 7.76 – 7.68 (m, 1H), 7.59 – 7.17 (m, 11H), 5.25 (tt, *J* = 6.5, 2.1 Hz, 1H), 4.77 – 4.61 (m, 1H), 4.50 (dd, *J* = 8.7, 5.1 Hz, 1H), 4.29 – 4.06 (m, 1H), 3.13 – 2.75 (m, 5H), 2.13 – 1.90 (m, 2H), 0.96 (t, *J* = 7.4 Hz, 3H). <sup>13</sup>C NMR (201 MHz, CDCl<sub>3</sub>) δ 201.5, 152.9, 151.9, 139.2, 138.7, 138.3, 127.5, 126.9, 126.1, 125.9, 125.7, 125.68, 125.66, 125.3, 123.3, 121.9, 119.1, 118.2, 110.1, 96.6, 93.2, 52.8, 43.8, 39.2, 33.3, 20.5, 11.9. HRMS (ESI) calcd for C<sub>29</sub>H<sub>28</sub>NO<sub>3</sub>S<sup>+</sup> [M+H]<sup>+</sup> 470.1784, found 470.1780. HPLC analysis: **3br**, 96% ee (AD-H, 5% isopropanol/hexane, 1.0 mL/min, UV: 254 nm), *t<sub>R</sub>* = 29.163 min (minor), 51.993 min (major).

**(S)-3-((S)-but-1-en-1-ylidene)-1-(methylsulfonyl)-5-(thiophen-2-yl)-2,3,4,5-tetrahydro-1H-benzofuro[3,2-b]azepine (3bs)**

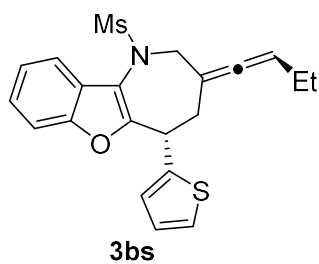

Prepared according to the general procedure as described above in 92% yield (36.7 mg), 13:1 dr and 94% ee.. It was purified by flash chromatography 4% EtOAc/PE) to afford a white solid. mp = 70 – 72°C;  $[\alpha]_D^{25} = -38.7$  (*c* 1.48, CH<sub>2</sub>Cl<sub>2</sub>); <sup>1</sup>H NMR (800 MHz, CDCl<sub>3</sub>) δ 7.75 – 7.58 (m, 1H), 7.38 – 7.31 (m, 1H), 7.28 – 7.07 (m, 3H), 6.92 – 6.68 (m, 2H), 5.27 – 5.15 (m, 1H), 4.74 – 4.53 (m, 2H), 3.91 (d, *J* = 15.2 Hz, 1H), 3.08 – 2.72 (m, 2H), 2.55 (s, 3H), 1.98 (qd, *J* = 7.4, 6.0 Hz, 2H), 0.92 (t, *J* = 7.4 Hz, 3H). <sup>13</sup>C NMR (201 MHz, CDCl<sub>3</sub>) δ 204.1, 153.2, 152.9, 143.9, 126.8, 126.7, 125.5, 124.9, 124.6, 123.3, 121.3, 119.4, 111.3, 111.2, 97.2, 93.9, 54.5, 40.2, 39.8, 34.9, 21.7, 13.3. HRMS (ESI) calcd for C<sub>21</sub>H<sub>22</sub>NO<sub>3</sub>S<sub>2</sub><sup>+</sup> [M+H]<sup>+</sup> 400.1036, found 400.1031. HPLC analysis: **3bs**, 94% ee (AD-H, 5% isopropanol/hexane, 1.0 mL/min, UV: 254 nm), *t<sub>R</sub>* = 18.653 min (minor), 33.143 min (major).

**(R)-3-((S)-but-1-en-1-ylidene)-9-chloro-1-(methylsulfonyl)-5-phenyl-2,3,4,5-tetrahydro-1H-benzofuro[3,2-b]azepine (3bt)**

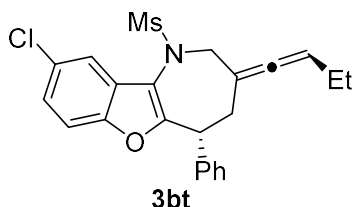

Prepared according to the general procedure as described above in 62% yield (26.5 mg), 19:1 dr and 92% ee. It was purified by flash chromatography 4% EtOAc/PE) to afford a viscous liquid;  $[\alpha]_{\text{D}}^{25} = -84.1$  ( $c$  0.70,  $\text{CH}_2\text{Cl}_2$ );  $^1\text{H}$  NMR (800 MHz,  $\text{CDCl}_3$ )  $\delta$  7.67 (d,  $J = 2.2$  Hz, 1H), 7.44 – 7.15 (m, 7H), 5.25 (ddq,  $J = 6.5, 4.4, 2.1$  Hz, 1H), 4.62 (d,  $J = 15.4$  Hz, 1H), 4.45 (dd,  $J = 8.5, 5.1$  Hz, 1H), 4.24 – 4.05 (m, 1H), 3.01 (dd,  $J = 14.2, 8.5$  Hz, 1H), 2.78 (s, 4H), 2.02 (p,  $J = 7.1$  Hz, 2H), 0.95 (t,  $J = 7.4$  Hz, 3H).  $^{13}\text{C}$  NMR (201 MHz,  $\text{CDCl}_3$ )  $\delta$  203.0, 155.9, 151.6, 140.2, 129.1, 128.8, 128.7, 128.1, 127.7, 127.3, 124.9, 120.2, 119.1, 112.4, 97.7, 94.5, 54.1, 45.2, 40.5, 34.4, 21.8, 13.2. HRMS (ESI) calcd for  $\text{C}_{23}\text{H}_{23}\text{ClNO}_3\text{S}^+$   $[\text{M}+\text{H}]^+$  428.1082, found 428.1081. HPLC analysis: **3bt**, 92% ee (AD-H, 5% isopropanol/hexane, 1.0 mL/min, UV: 254 nm),  $t_{\text{R}} = 13.183$  min (minor), 24.98 min (major).

**(R)-3-((S)-but-1-en-1-ylidene)-8-chloro-1-(methylsulfonyl)-5-phenyl-2,3,4,5-tetrahydro-1H-benzofuro[3,2-b]azepine (3bu)**

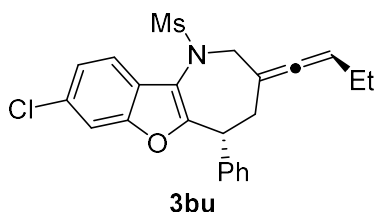

Prepared according to the general procedure as described above in 77% yield (32.9 mg), 13:1 dr and 93% ee. It was purified by flash chromatography 4% EtOAc/PE) to afford a white solid. mp = 48 – 50°C;  $[\alpha]_{\text{D}}^{25} = -16.7$  ( $c$  0.70,  $\text{CH}_2\text{Cl}_2$ );  $^1\text{H}$  NMR (800 MHz,  $\text{CDCl}_3$ )  $\delta$  7.63 (d,  $J = 8.5$  Hz, 1H), 7.43 – 7.11 (m, 7H), 5.24 (tt,  $J = 6.2, 2.0$  Hz, 1H), 4.62 (d,  $J = 15.4$  Hz, 1H), 4.46 (dd,  $J = 8.2, 5.0$  Hz, 1H), 4.23 – 4.05 (m, 1H), 3.01 (dd,  $J = 14.2, 8.3$  Hz, 1H), 2.86 – 2.69 (m, 4H), 2.11 – 1.92 (m, 2H), 0.96 (t,  $J = 7.4$  Hz, 3H).  $^{13}\text{C}$  NMR (201 MHz,  $\text{CDCl}_3$ )  $\delta$  203.1, 154.2, 153.2, 140.2, 130.5, 128.74, 128.71, 127.7, 127.6, 127.3, 125.4, 124.0, 121.4, 119.6, 111.8, 97.6, 94.4, 54.2, 54.1, 44.9, 40.3, 34.4, 21.8, 13.2. HRMS (ESI) calcd for  $\text{C}_{23}\text{H}_{23}\text{ClNO}_3\text{S}^+$   $[\text{M}+\text{H}]^+$  428.1082, found 428.1096. HPLC analysis: **3bu**, 93% ee (IA, 5% isopropanol/hexane, 1.0 mL/min, UV: 254 nm),  $t_{\text{R}} = 13.073$  min (minor), 34.76 min (major).

**(R)-8-bromo-3-((S)-but-1-en-1-ylidene)-1-(methylsulfonyl)-5-phenyl-2,3,4,5-tetrahydro-1H-benzofuro[3,2-b]azepine (3bv)**

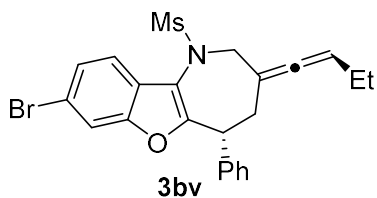

Prepared according to the general procedure as described above in 66% yield (31.1 mg), 13:1 dr and 92% ee. It was purified by flash chromatography 4% EtOAc/PE) to afford a viscous liquid;  $[\alpha]_D^{25} = -19.7$  ( $c$  1.18,  $\text{CH}_2\text{Cl}_2$ );  $^1\text{H}$  NMR (800 MHz,  $\text{CDCl}_3$ )  $\delta$  7.60 – 7.38 (m, 2H), 7.35 – 7.08 (m, 6H), 5.17 (tt,  $J = 6.2, 2.1$  Hz, 1H), 4.59 – 4.48 (m, 1H), 4.38 (dd,  $J = 8.2, 5.0$  Hz, 1H), 4.13 – 3.96 (m, 1H), 3.03 – 2.56 (m, 5H), 1.95 (qdd,  $J = 7.3, 6.1, 0.9$  Hz, 2H), 0.89 (t,  $J = 7.4$  Hz, 3H).  $^{13}\text{C}$  NMR (201 MHz,  $\text{CDCl}_3$ )  $\delta$  203.1, 154.8, 153.4, 140.2, 128.74, 128.71, 127.7, 127.6, 127.3, 126.7, 125.9, 121.8, 119.6, 117.9, 114.7, 97.6, 94.4, 54.2, 44.9, 40.3, 34.4, 21.8, 13.2. HRMS (ESI) calcd for  $\text{C}_{23}\text{H}_{23}\text{BrNO}_3\text{S}^+$   $[\text{M}+\text{H}]^+$  472.0577, found 472.0570. HPLC analysis: **3bv**, 92% ee (AD-H, 5% isopropanol/hexane, 1.0 mL/min, UV: 254 nm),  $t_R = 14.937$  min (minor), 63.11 min (major).

**(R)-3-((S)-but-1-en-1-ylidene)-9-methyl-1-(methylsulfonyl)-5-phenyl-2,3,4,5-tetrahydro-1H-benzofuro[3,2-b]azepine (3bw)**

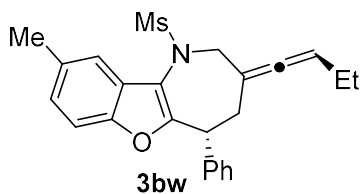

Prepared according to the general procedure as described above in 95% yield (38.6 mg), >20:1 dr and 96% ee. It was purified by flash chromatography 4% EtOAc/PE) to afford a viscous liquid;  $[\alpha]_D^{25} = -73.8$  ( $c$  1.19,  $\text{CH}_2\text{Cl}_2$ );  $^1\text{H}$  NMR (800 MHz,  $\text{CDCl}_3$ )  $\delta$  7.48 (d,  $J = 1.8$  Hz, 1H), 7.36 – 7.18 (m, 6H), 7.08 (dd,  $J = 8.5, 1.8$  Hz, 1H), 5.23 (ddq,  $J = 6.3, 4.2, 2.0$  Hz, 1H), 4.63 (s, 1H), 4.45 (dd,  $J = 8.4, 5.1$  Hz, 1H), 4.11 (d,  $J = 14.7$  Hz, 1H), 3.02 (dd,  $J = 14.2, 8.4$  Hz, 1H), 2.77 (d,  $J = 16.4$  Hz, 4H), 2.45 (s, 3H), 2.12 – 1.92 (m, 2H), 0.96 (t,  $J = 7.4$  Hz, 3H).  $^{13}\text{C}$  NMR (201 MHz,  $\text{CDCl}_3$ )  $\delta$  202.9, 154.5, 151.7, 140.7, 132.8, 128.7, 128.6, 127.8, 127.1, 126.7, 125.9, 120.1, 119.2, 110.9, 97.9, 94.3, 54.1, 45.2, 40.4, 34.5, 21.8, 21.5, 13.3. HRMS (ESI) calcd for  $\text{C}_{24}\text{H}_{26}\text{NO}_3\text{S}^+$   $[\text{M}+\text{H}]^+$  408.1628, found 408.1619. HPLC analysis: **3bw**, 96% ee (AD-H, 5% isopropanol/hexane, 1.0 mL/min, UV: 254 nm),  $t_R = 11.41$  min (minor), 23.727 min (major).

**(R)-3-((S)-but-1-en-1-ylidene)-5-phenyl-1-(phenylsulfonyl)-2,3,4,5-tetrahydro-1H-benzofuro[3,2-b]azepine (3bx)**

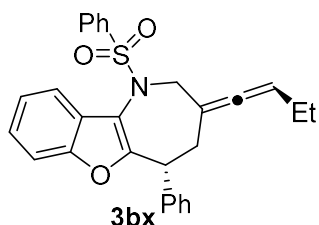

Prepared according to the general procedure as described above in 99% yield (45.1 mg), 9:1 dr and 95% ee. It was purified by flash chromatography 4% EtOAc/PE) to afford a white solid. mp = 50 – 52°C;  $[\alpha]_D^{25} = -346.8$  (*c* 0.95, CH<sub>2</sub>Cl<sub>2</sub>); <sup>1</sup>H NMR (800 MHz, CDCl<sub>3</sub>) δ 7.76 (d, *J* = 7.9 Hz, 2H), 7.59 – 7.31 (m, 4H), 7.27 – 7.10 (m, 6H), 6.91 (d, *J* = 7.7 Hz, 2H), 5.21 – 4.97 (m, 1H), 4.69 (s, 1H), 4.41 – 4.16 (m, 1H), 4.05 – 3.87 (m, 1H), 2.41 – 2.18 (m, 1H), 2.04 (t, *J* = 12.6 Hz, 1H), 1.93 – 1.59 (m, 2H), 0.93 – 0.66 (m, 3H). <sup>13</sup>C NMR (201 MHz, CDCl<sub>3</sub>) δ 201.3, 167.8, 153.9, 153.7, 153.6, 141.1, 139.4, 133.1, 133.0, 132.4, 130.9, 129.3, 129.1, 129.0, 128.9, 128.6, 128.0, 127.9, 127.8, 127.7, 127.13, 127.10, 126.7, 126.6, 124.54, 124.51, 123.1, 123.0, 121.0, 119.5, 111.3, 98.4, 95.0, 65.6, 54.5, 54.4, 46.6, 34.8, 30.6, 21.8, 19.2, 13.8, 13.3. HRMS (ESI) calcd for C<sub>28</sub>H<sub>26</sub>NO<sub>3</sub>S<sup>+</sup> [M+H]<sup>+</sup> 456.1628, found 456.1637. HPLC analysis: **3bx**, 95% ee (AD-H, 5% isopropanol/hexane, 1.0 mL/min, UV: 254 nm), *t<sub>R</sub>* = 10.57 min (minor), 33.583 min (major).

**(R)-3-((S)-but-1-en-1-ylidene)-5-(tert-butyl)-1-(methylsulfonyl)-2,3,4,5-tetrahydro-1H-benzofuro[3,2-b]azepine (3by)**

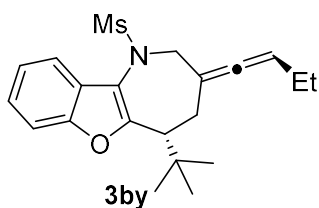

Prepared according to the general procedure as described above in 86% yield (32.1 mg), 6:1 dr and 92% ee. It was purified by flash chromatography 4% EtOAc/PE) to afford a viscous liquid.  $[\alpha]_D^{25} = 36.5$  (*c* 1.54, CH<sub>2</sub>Cl<sub>2</sub>); <sup>1</sup>H NMR (800 MHz, CDCl<sub>3</sub>) δ 7.61 – 7.52 (m, 1H), 7.43 – 7.36 (m, 1H), 7.25 (m, 2H), 5.32 – 5.14 (m, 1H), 4.51 (s, 1H), 4.01 (s, 1H), 3.19 (s, 3H), 2.85 (dd, *J* = 11.3, 6.9 Hz, 1H), 2.63 (dt, *J* = 9.4, 4.8 Hz, 1H), 2.46 (t, *J* = 12.2 Hz, 1H), 1.84 (dq, *J* = 14.5, 7.7 Hz, 2H), 1.11 (s, 9H), 0.63 (s, 3H). <sup>13</sup>C NMR (201 MHz, CDCl<sub>3</sub>) δ 201.9, 155.9, 153.3, 126.4, 124.1, 124.0, 122.9, 122.9, 119.1, 118.2, 111.3, 111.2, 99.0, 95.1, 53.8, 53.5, 51.4, 41.0, 35.3, 28.5, 28.4, 21.9, 21.4, 13.3, 12.4. HRMS (ESI) calcd for C<sub>21</sub>H<sub>28</sub>NO<sub>3</sub>S<sup>+</sup> [M+H]<sup>+</sup> 374.1790, found 374.1786. HPLC analysis: **3by**, 95% ee (IA, 5% isopropanol/hexane, 1.0 mL/min, UV: 254 nm), *t<sub>R</sub>* = 10.273 min (major), 11.033 min (minor).

## Scaled-up Synthesis of the Product **3ba**

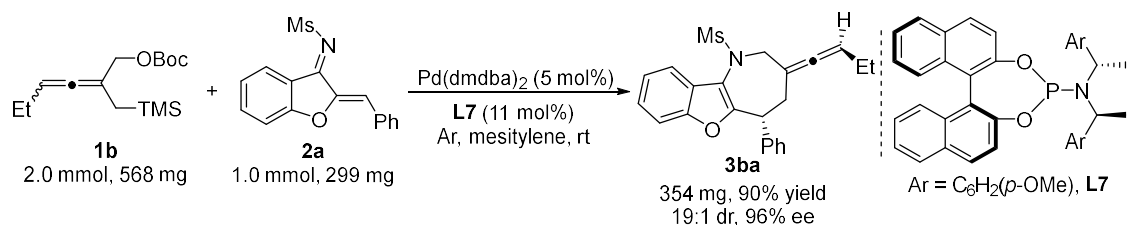

Under argon atmosphere, to a mixture of TMM donor **1b** (2.0 mmol), benzofuran-derived azadiene **2a** (1.0 mmol) and catalyst Pd(dmdba)<sub>2</sub> (5 mol%, 0.5 mmol) / L7 (11 mol%, 0.11 mmol) in a Schlenk tube, 10 mL of mesitylene were added at room temperature. The resulting mixture was stirred until the starting material were completely consumed (monitored by TLC) and then was concentrated to dryness. The residue was purified through flash column chromatography (EtOAc/PE= 1:25) to afford the corresponding chiral cycloaddition product **3ba** with 90% yield (354 mg) and 96% ee, 19:1 dr.

## Transformations of the Product **3ia** and **3ba**

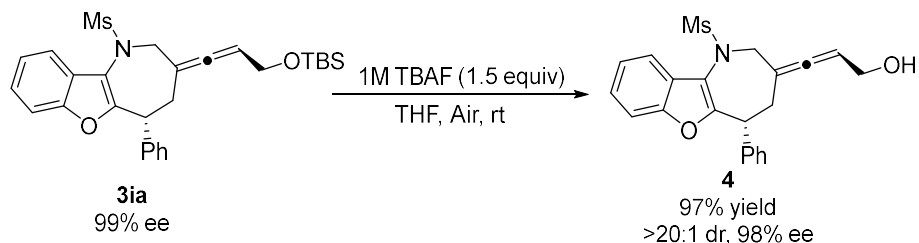

To a solution of **3ia** (50 mg, 0.10 mmol, 1.0 equiv) in THF (1M, 3.5 mL) at room temperature was added 1M TBAF solution in THF (0.15 mL), stirred for 30 min while being monitored by TLC. The solution was diluted with H<sub>2</sub>O and extracted with diethyl ether. The extracts were washed with brine and dried over MgSO<sub>4</sub> and the solvent was removed in vacuo. The product was purified by column chromatography on silica gel (25% EtOAc/PE) to give a viscous liquid **4** (38.4 mg, 97% yield with 98% ee, >20:1 dr). **4**: (*S*)-3-((*R*)-1-(methylsulfonyl)-5-phenyl-1,2,4,5-tetrahydro-3*H*-benzofuro[3,2-*b*]azepin-3-ylidene)prop-2-en-1-ol [ $\alpha$ ]<sub>D</sub><sup>25</sup> = -56.1 (*c* 1.10, CH<sub>2</sub>Cl<sub>2</sub>); <sup>1</sup>H NMR (800 MHz, CDCl<sub>3</sub>) δ 7.75 – 7.61 (m, 1H), 7.43 – 7.14 (m, 9H), 5.38 (tt, *J* = 5.4, 2.3 Hz, 1H), 4.60 – 4.25 (m, 2H), 4.19 – 4.09 (m, 2H), 3.12 – 2.73 (m, 5H), 1.84 (s, 1H). <sup>13</sup>C NMR (201 MHz, CDCl<sub>3</sub>) δ

202.2, 154.4, 153.2, 140.1, 128.8, 128.7, 127.9, 127.8, 127.3, 126.4, 124.7, 123.4, 120.2, 119.6, 111.5, 100.5, 93.3, 60.1, 53.9, 45.11, 40.5, 34.9. HRMS (ESI) calcd for  $C_{22}H_{22}NO_4S^+[M+H]^+$  396.1264, found 396.1266. HPLC analysis: **4**, 98% ee (IA, 15% isopropanol/hexane, 1.0 mL/min, UV: 254 nm),  $t_R$  = 13.197 min (minor), 27.903 min (major).

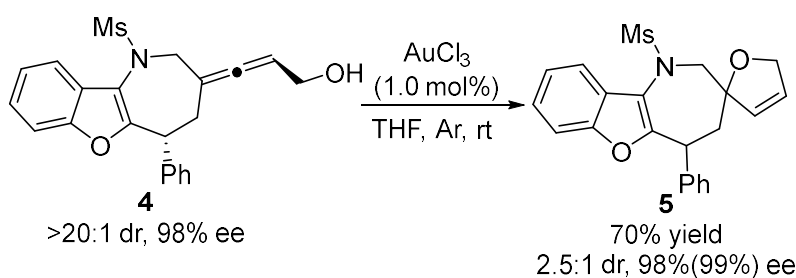

A solution of **4** (79.0 mg, 0.20 mmol, 1.0 equiv) and  $AuCl_3$  (0.6 mg, 1.0 mol %) in THF (0.20 mL) was stirred at room temperature for 5 h. The reaction mixture was concentrated to a crude oil and purified by column chromatography on silica gel (10% EtOAc/PE) to give a viscous liquid **5** (55.3 mg, 70% yield with 98% (99%) ee, 2.5:1 dr). **5**: 1-(methylsulfonyl)-5-phenyl-1,2,4,5-tetrahydro-5'*H*-spiro[benzofuro[3,2-*b*]azepine-3,2'-furan] [ $\alpha$ ] $^{25}_D$  = 4.3 (*c* 2.00,  $CH_2Cl_2$ );  $^1H$  NMR (800 MHz,  $CDCl_3$ )  $\delta$  8.06 – 7.05 (m, 9H), 6.12 – 5.48 (m, 2H), 4.91 – 4.57 (m, 2H), 4.35 – 4.14 (m, 1H), 4.03 – 3.89 (m, 1H), 3.29 (d, *J* = 9.0 Hz, 3H), 2.38 – 1.71 (m, 3H).  $^{13}C$  NMR (201 MHz,  $CDCl_3$ )  $\delta$  154.7, 153.4, 152.9, 141.8, 131.7, 129.8, 129.4, 128.8, 128.7, 128.68, 128.66, 127.9, 127.6, 127.4, 127.2, 126.2, 125.8, 124.7, 124.2, 123.2, 123.1, 121.8, 120.9, 111.4, 111.2, 107.7, 106.4, 92.6, 91.2, 74.6, 74.4, 67.7, 67.5, 60.4, 56.5, 43.1, 41.9, 41.7, 40.2, 39.9, 29.6, 29.5, 23.9, 23.8. HRMS (ESI) calcd for  $C_{22}H_{22}NO_4S^+[M+H]^+$  396.1264, found 396.1274. HPLC analysis: **5**, 98% (99%) ee (IB, 5% isopropanol/hexane, 1.0 mL/min, UV: 254 nm), the major diastereomer  $t_R$  = 12.113 min (minor), 12.74 min (major), the minor diastereomer  $t_R$  = 13.913 min (trans-major).

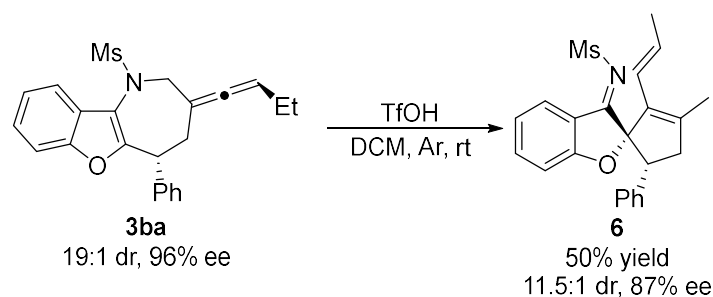

To a solution of **3ba** (40 mg, 0.10 mmol) in dichloromethane (1 mL), TfOH (18  $\mu$ L, 0.2 mmol) was added. The reaction mixture was stirred at room temperature for 12 hours under argon atmosphere. Then, saturated aqueous NaHCO<sub>3</sub> solution was added and the mixture was extracted with dichloromethane three times. The combined organic layers were dried over anhydrous Na<sub>2</sub>SO<sub>4</sub>, filtered and evaporated. The product was purified by column chromatography on silica gel (5% EtOAc/PE) to give a white solid **6** (19.6 mg, 50% yield with 87% ee, 11.5:1 dr). **6**: *N*-((2*S*,5'*R*,*E*)-3'-methyl-5'-phenyl-2'-((*E*)-prop-1-en-1-yl)-3*H*-spiro[benzofuran-2,1'-cyclopentan]-2'-en-3-ylidene)methanesulfonamide mp = 70 – 73°C;  $[\alpha]_D^{25}$  = 210.8 (*c* 0.60, CH<sub>2</sub>Cl<sub>2</sub>); <sup>1</sup>H NMR (800 MHz, CDCl<sub>3</sub>)  $\delta$  8.32 (d, *J* = 8.1 Hz, 1H), 7.36 (ddd, *J* = 8.5, 7.1, 1.4 Hz, 1H), 7.18 – 6.97 (m, 5H), 6.95 – 6.85 (m, 1H), 6.64 (d, *J* = 8.4 Hz, 1H), 6.13 – 5.99 (m, 1H), 5.07 (dq, *J* = 16.0, 6.6 Hz, 1H), 3.86 (t, *J* = 8.5 Hz, 1H), 3.28 (s, 3H), 3.13 (dd, *J* = 17.3, 8.8 Hz, 1H), 2.83 (dd, *J* = 17.2, 7.9 Hz, 1H), 2.02 (s, 3H), 1.72 – 1.59 (m, 3H). <sup>13</sup>C NMR (201 MHz, CDCl<sub>3</sub>)  $\delta$  183.7, 169.0, 145.5, 138.7, 135.3, 131.7, 130.2, 129.0, 127.7, 127.2, 126.7, 121.7, 121.5, 118.9, 112.3, 103.7, 57.6, 43.0, 42.4, 19.1, 15.2. HRMS (ESI) calcd for C<sub>23</sub>H<sub>24</sub>NO<sub>3</sub>S<sup>+</sup> [M+H]<sup>+</sup> 394,1471, found 394.1473. HPLC analysis: **6**, 87% ee (IA, 5% isopropanol/hexane, 1.0 mL/min, UV: 254 nm), *t<sub>R</sub>* = 9.443 min (major), 9.927 min (minor).

## References

- [1] B. M. Trost, Z. Daniel, M. Guillaume, H. Christoph, Autumn, M. Enantio- and Diastereoselective Synthesis of Chiral Allenes by Palladium-Catalyzed Asymmetric [3+2] Cycloaddition Reactions. *Angew. Chem. Int. Ed.* **2018**, *57*, 12916–12920.
- [2] H. Xie, L. Sun, B. Wu, Y. Zhou, Copper-Catalyzed Alkynylation/ Cyclization/ Isomerization Cascade for Synthesis of 1,2-Dihydrobenzofuro[3,2-*b*]pyridines and Benzofuro[3,2-*b*]pyridines. *J. Org. Chem.* **2019**, *84*, 15498–15507.



# $^1\text{H}$ and $^{13}\text{C}$ NMR Spectra of All Products

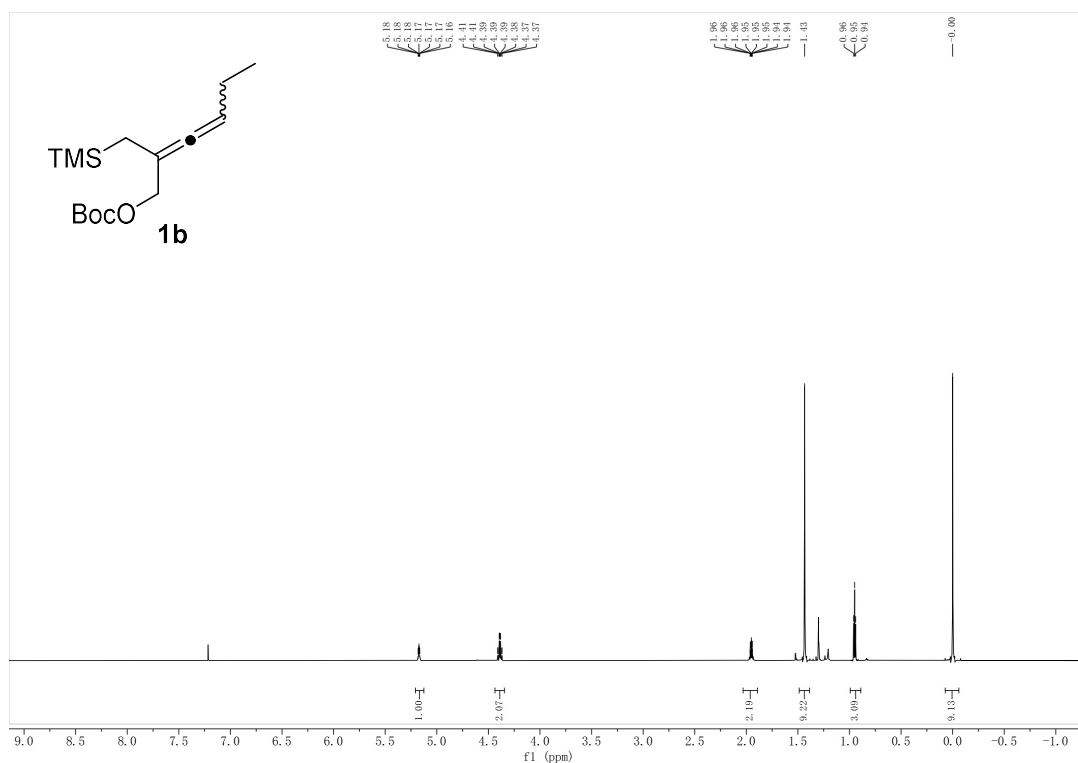

Figure S1.  $^1\text{H}$  NMR spectrum of compound **1b** in  $\text{CDCl}_3$  at 800 MHz.

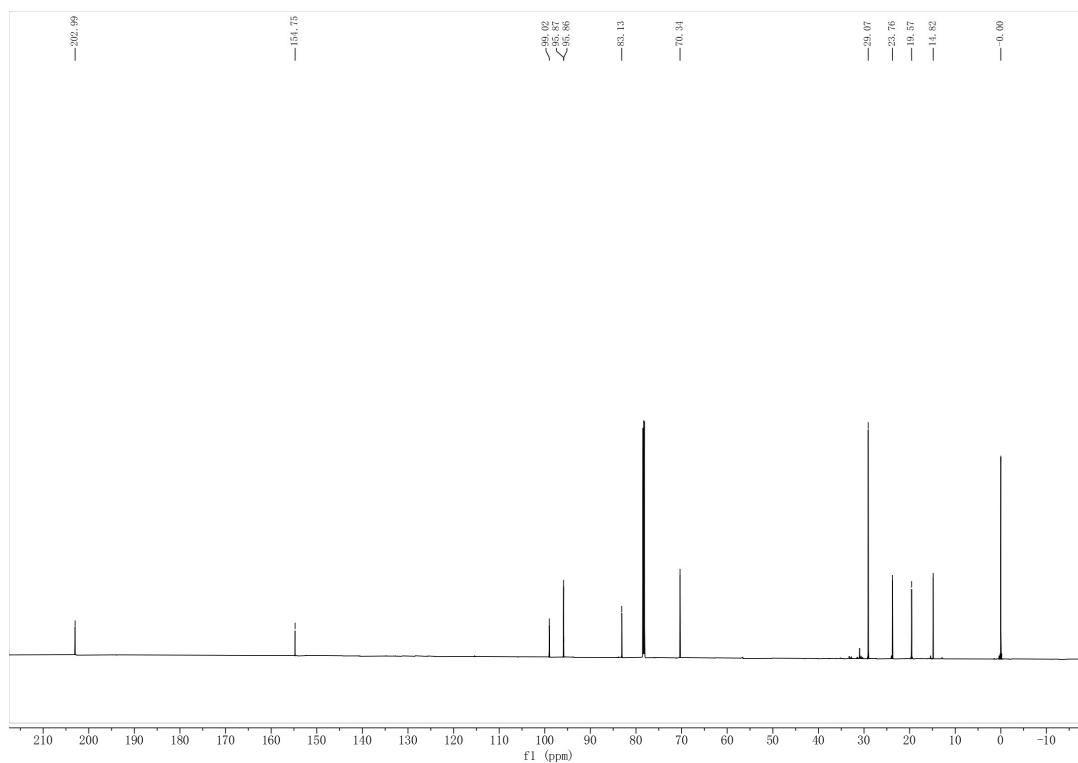

Figure S2.  $^{13}\text{C}$  NMR spectrum of compound **1b** in  $\text{CDCl}_3$  at 201 MHz.

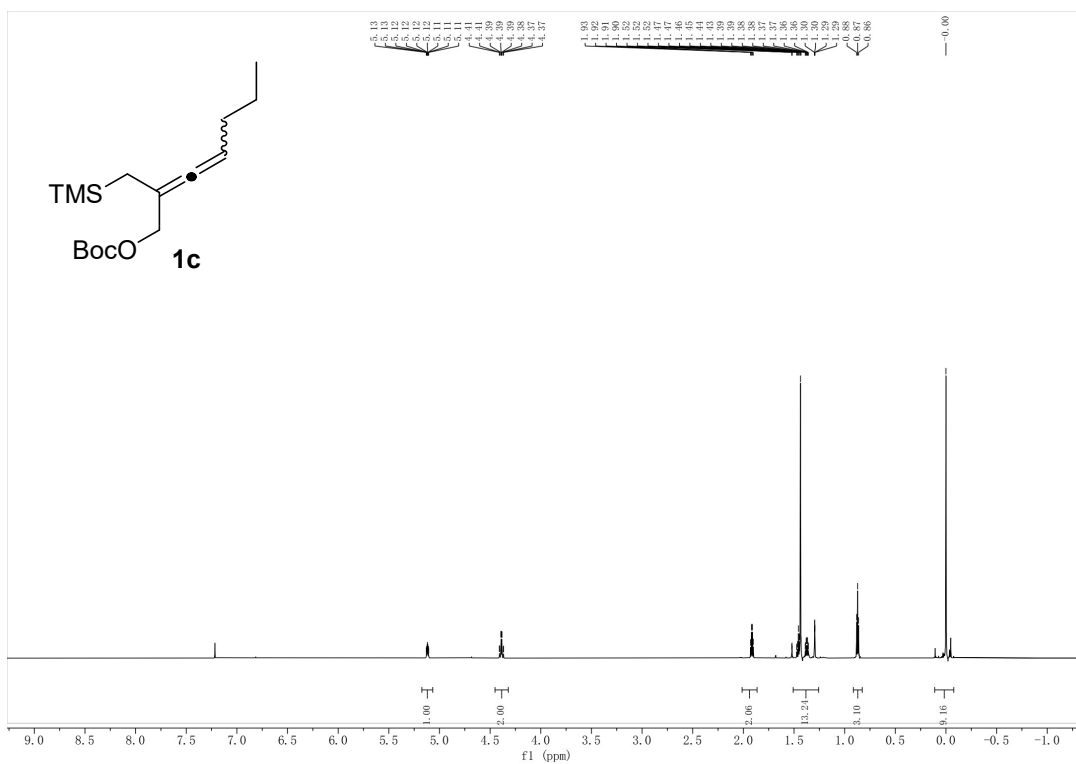

Figure S3. <sup>1</sup>H NMR spectrum of compound **1c** in CDCl<sub>3</sub> at 800 MHz.

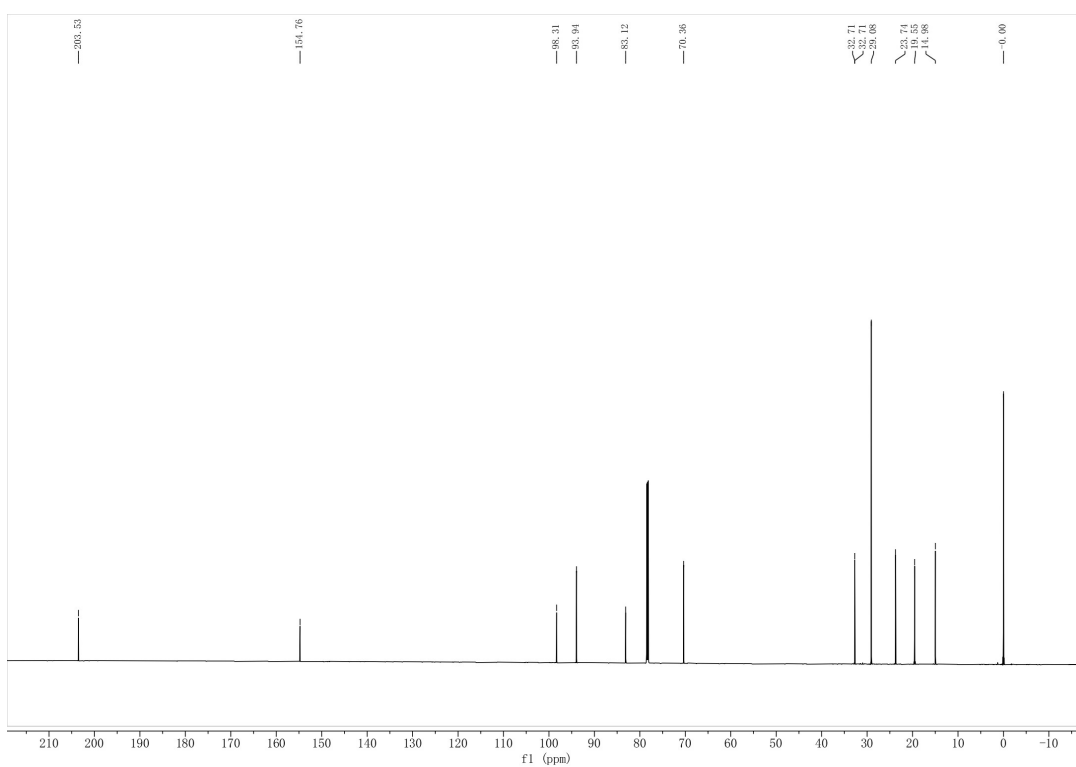

Figure S4. <sup>13</sup>C NMR spectrum of compound **1c** in CDCl<sub>3</sub> at 201 MHz.

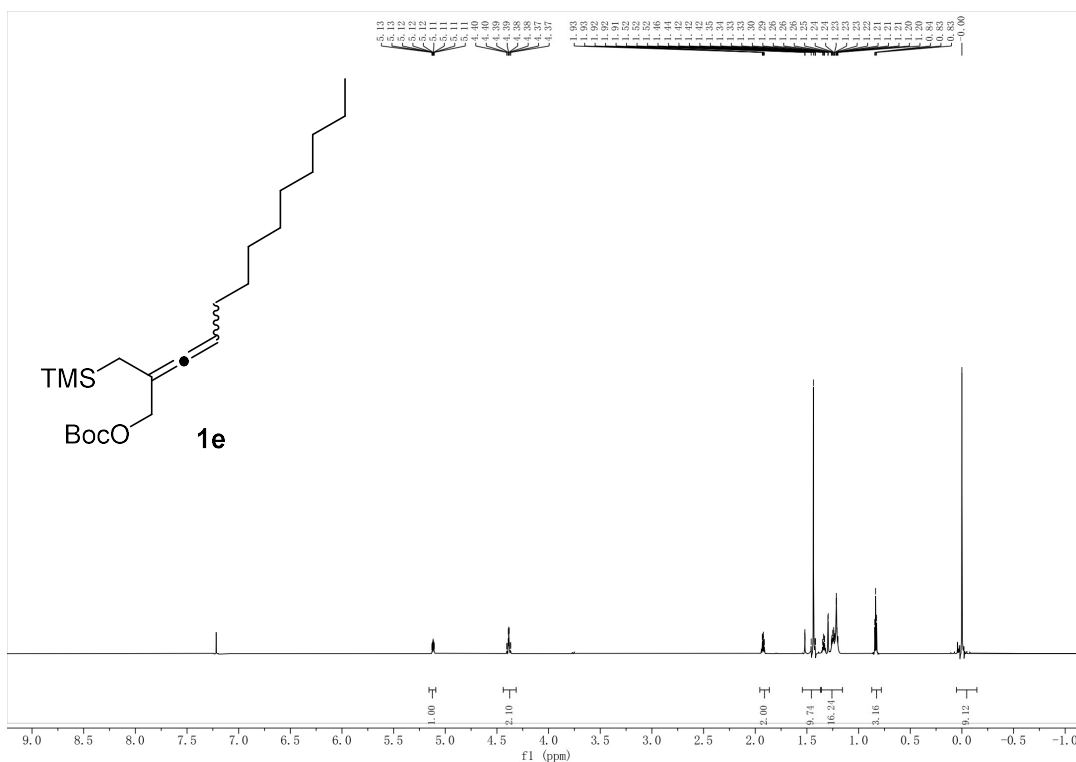

Figure S5. <sup>1</sup>H NMR spectrum of compound **1e** in CDCl<sub>3</sub> at 800 MHz.

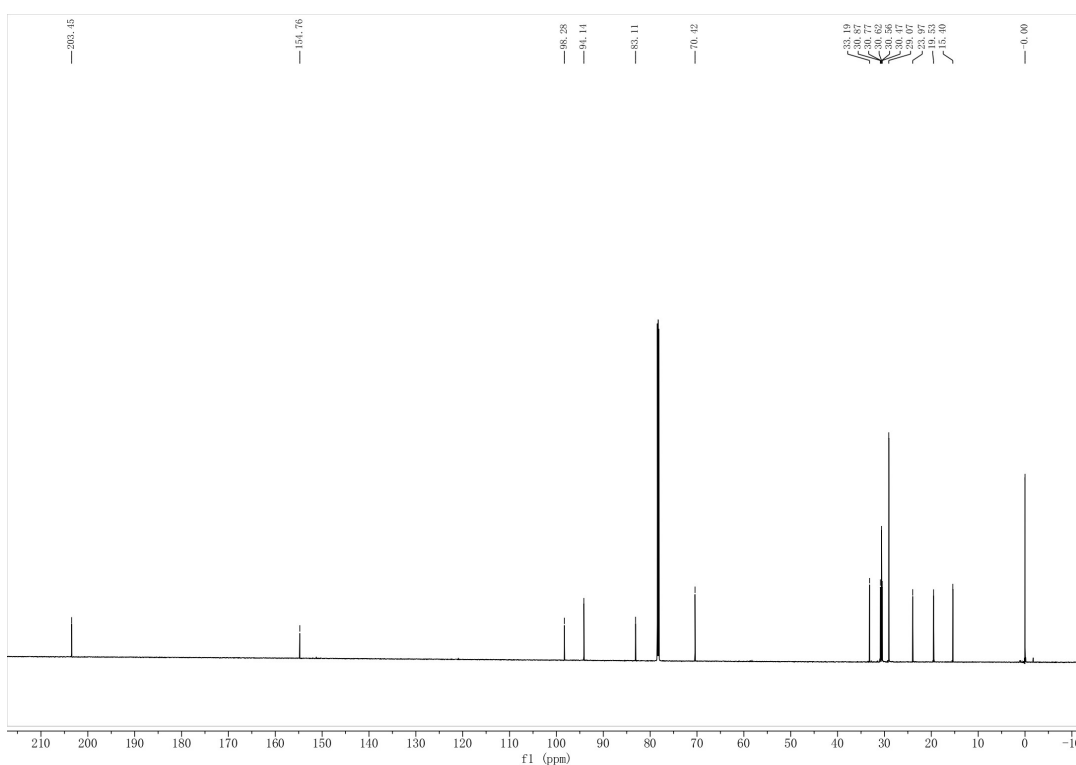

Figure S6. <sup>13</sup>C NMR spectrum of compound **1e** in CDCl<sub>3</sub> at 201 MHz.

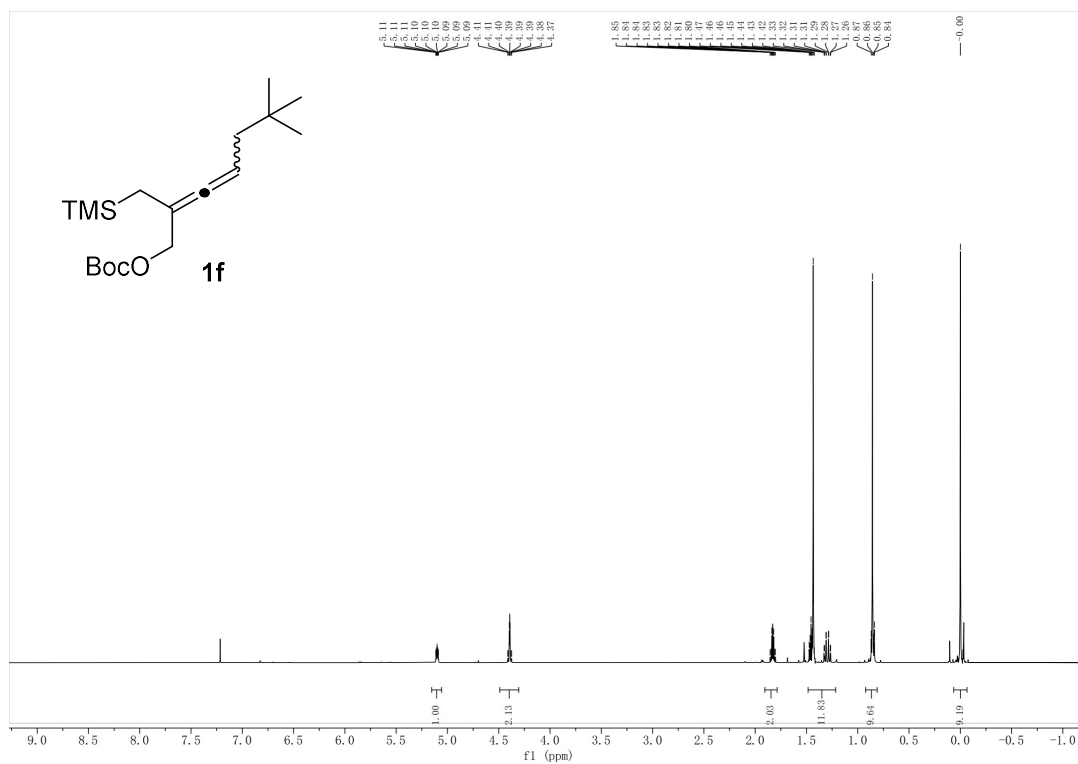

Figure S7.  $^1\text{H}$  NMR spectrum of compound **1f** in  $\text{CDCl}_3$  at 800 MHz.

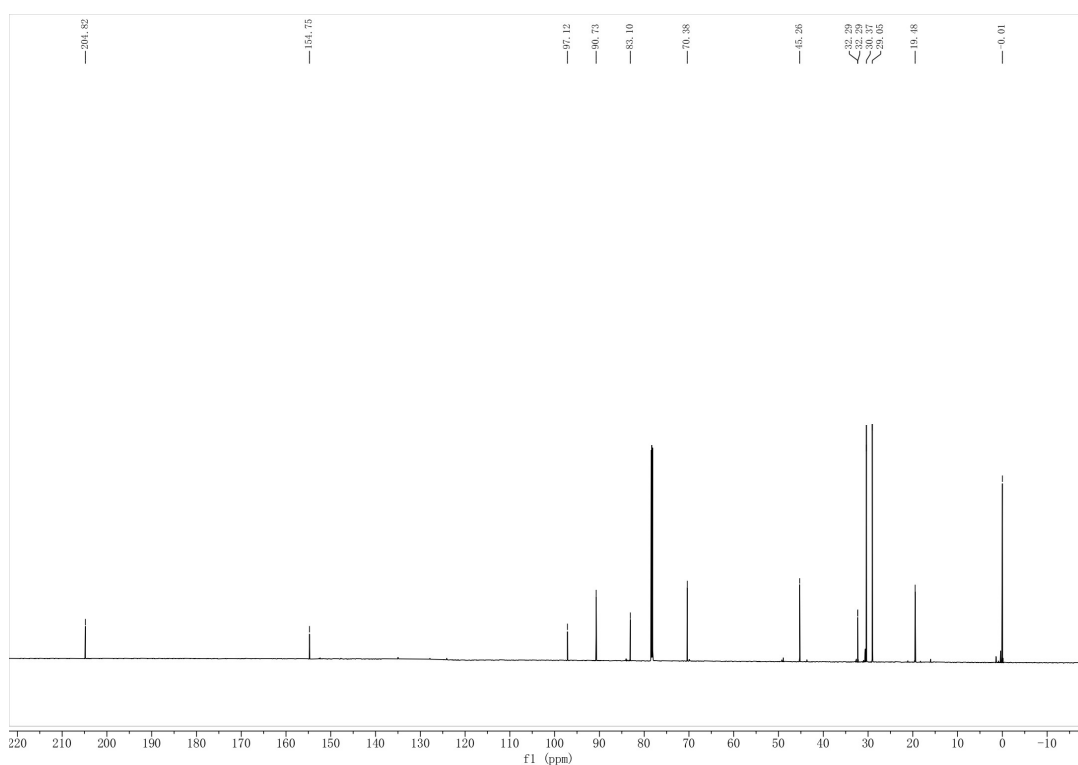

Figure S8.  $^{13}\text{C}$  NMR spectrum of compound **1f** in  $\text{CDCl}_3$  at 201 MHz.



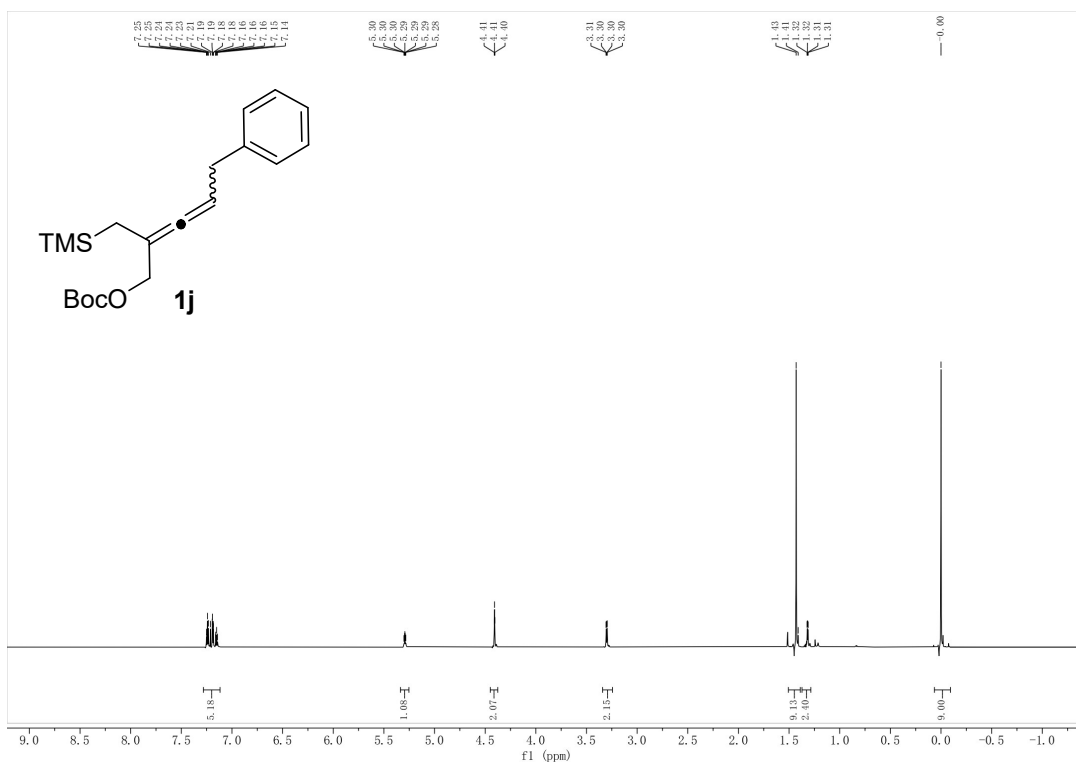

Figure S11. <sup>1</sup>H NMR spectrum of compound **1j** in CDCl<sub>3</sub> at 800 MHz.

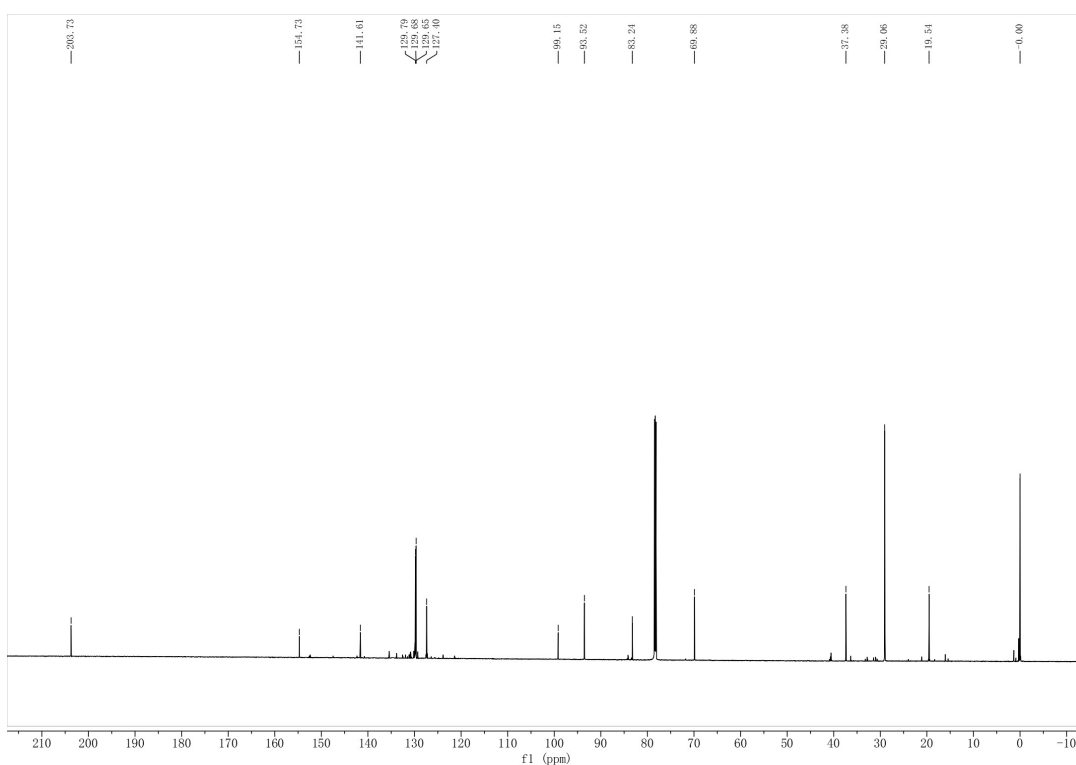

Figure S12. <sup>13</sup>C NMR spectrum of compound **1j** in CDCl<sub>3</sub> at 201 MHz.

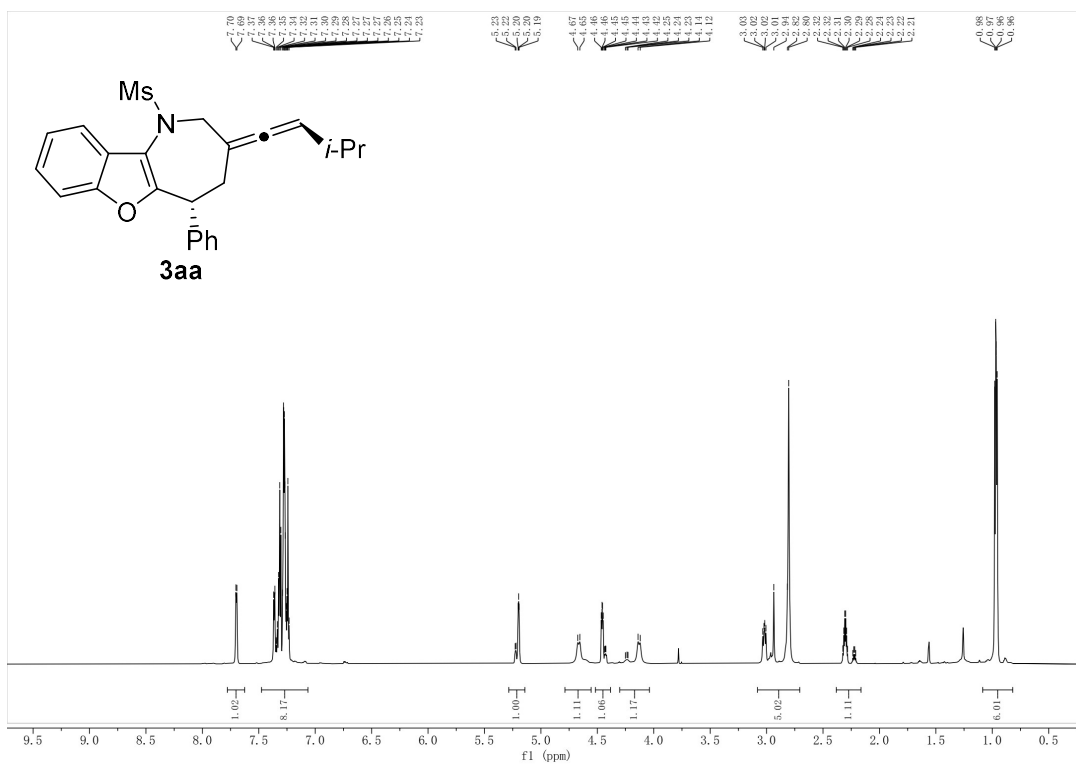

Figure S13. <sup>1</sup>H NMR spectrum of compound **3aa** in CDCl<sub>3</sub> at 800 MHz.

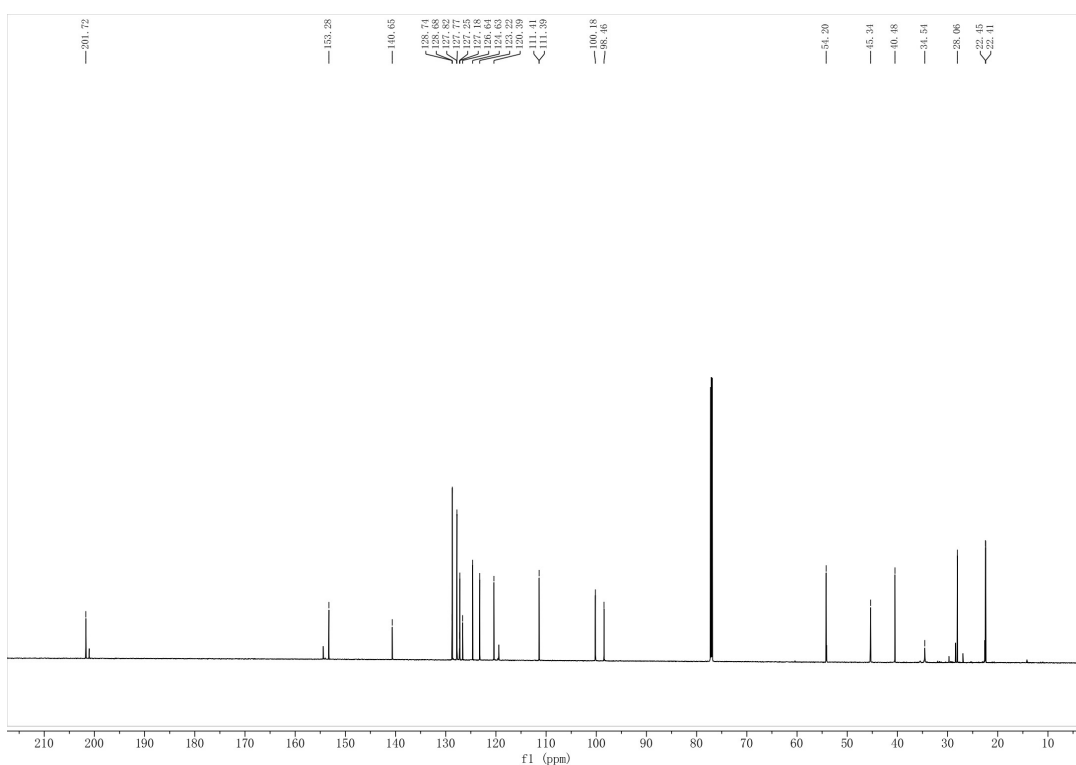

Figure S14. <sup>13</sup>C NMR spectrum of compound **3aa** in CDCl<sub>3</sub> at 201 MHz.





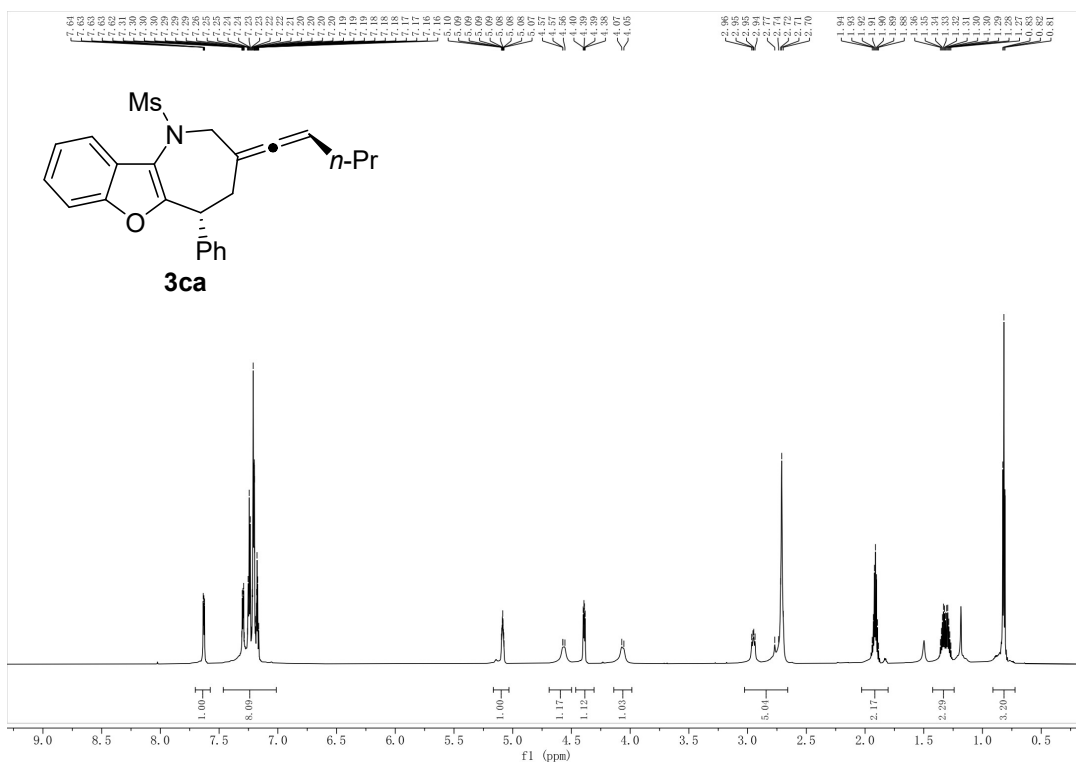

Figure S17. <sup>1</sup>H NMR spectrum of compound **3ca** in CDCl<sub>3</sub> at 800 MHz.

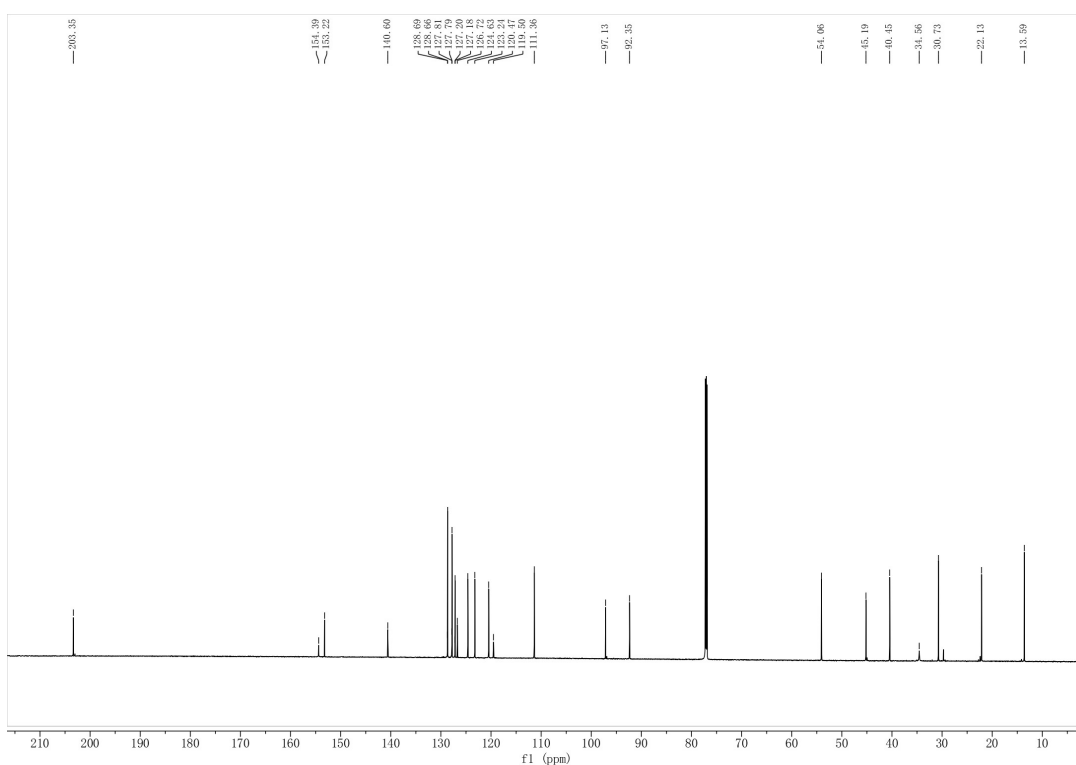

Figure S18. <sup>13</sup>C NMR spectrum of compound **3ca** in CDCl<sub>3</sub> at 201 MHz.

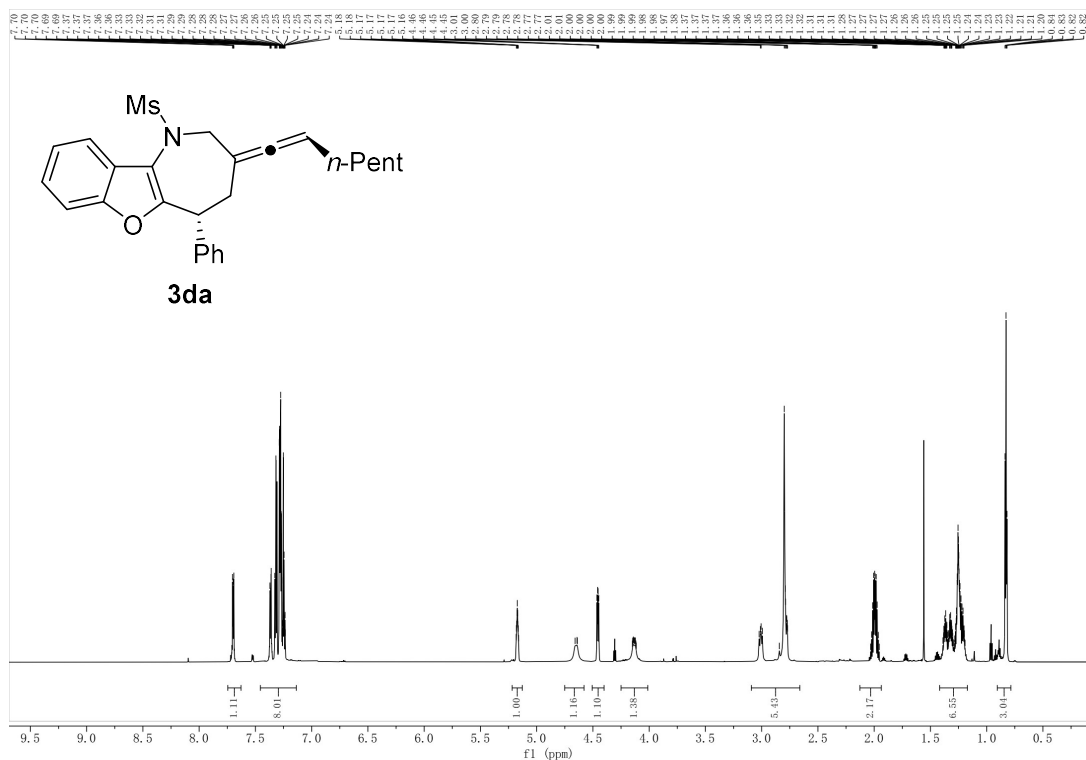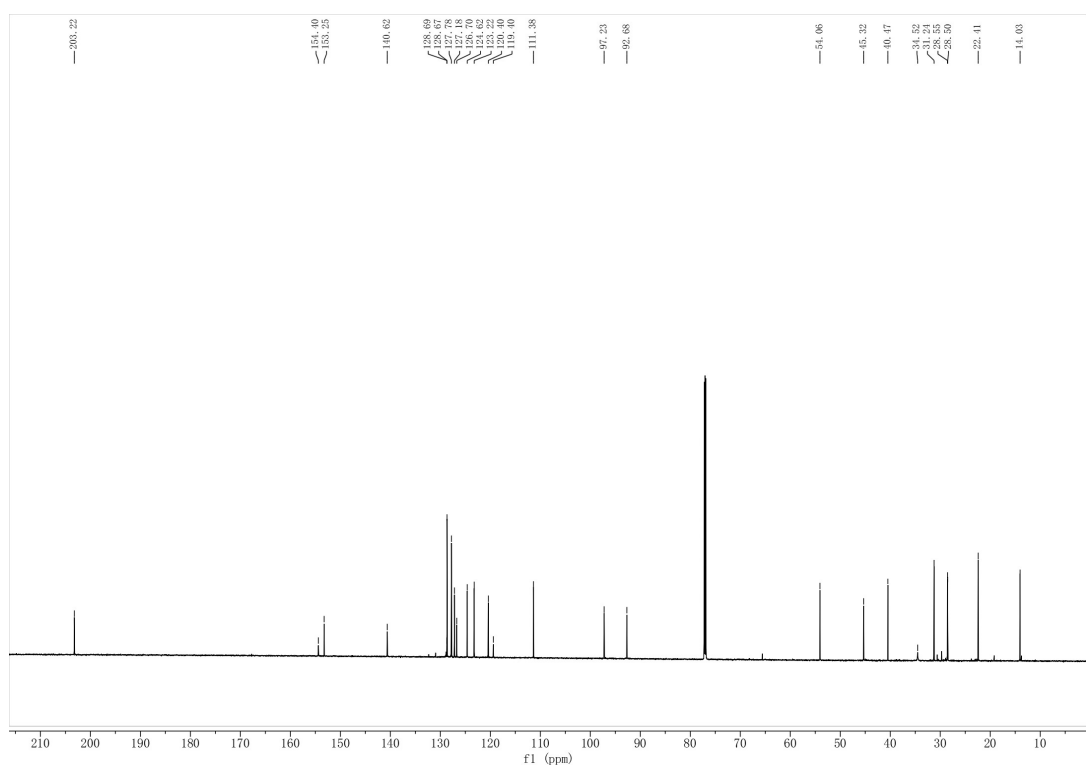

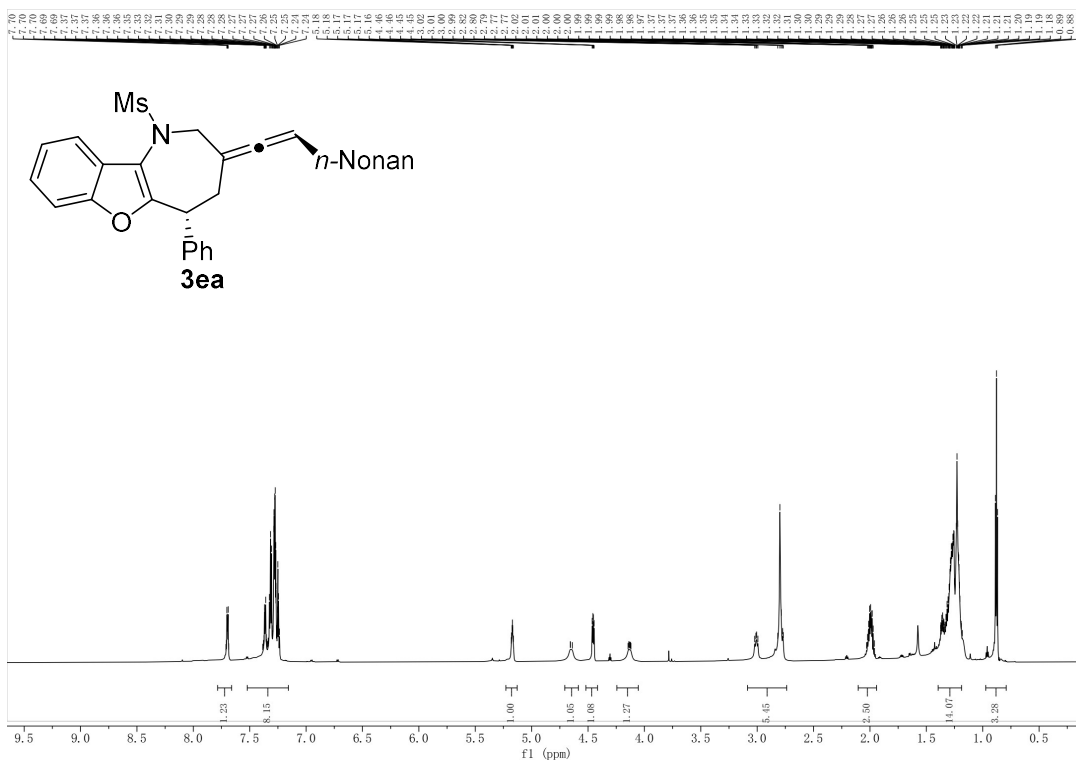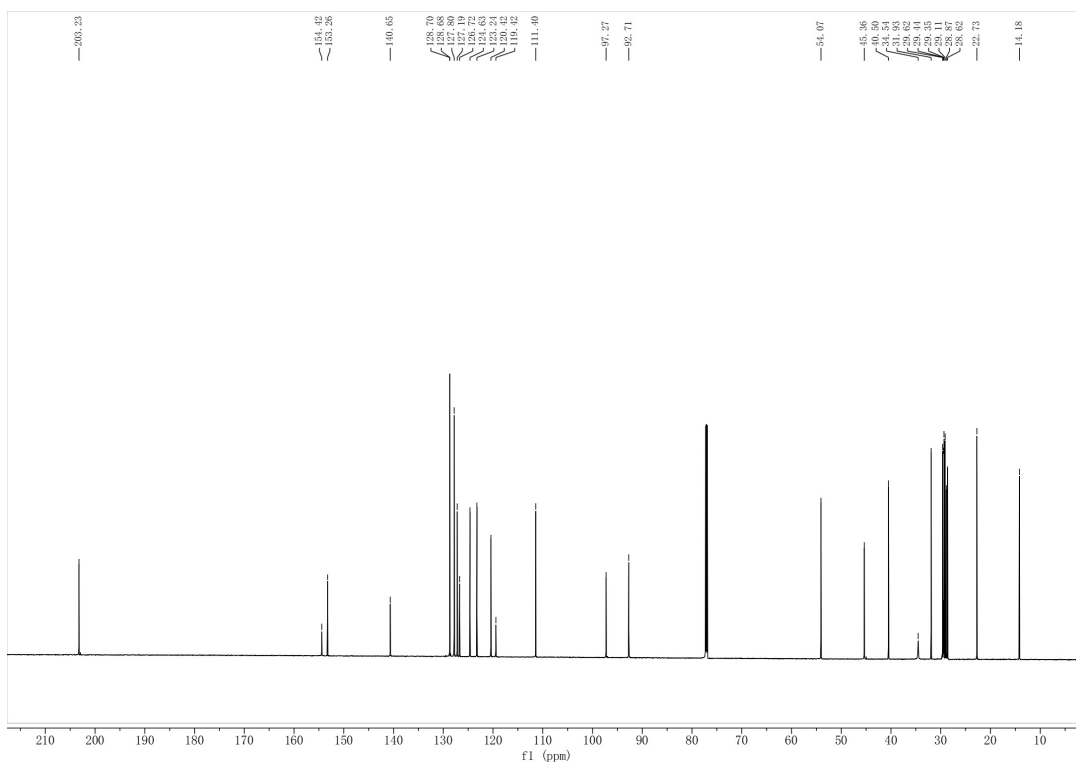

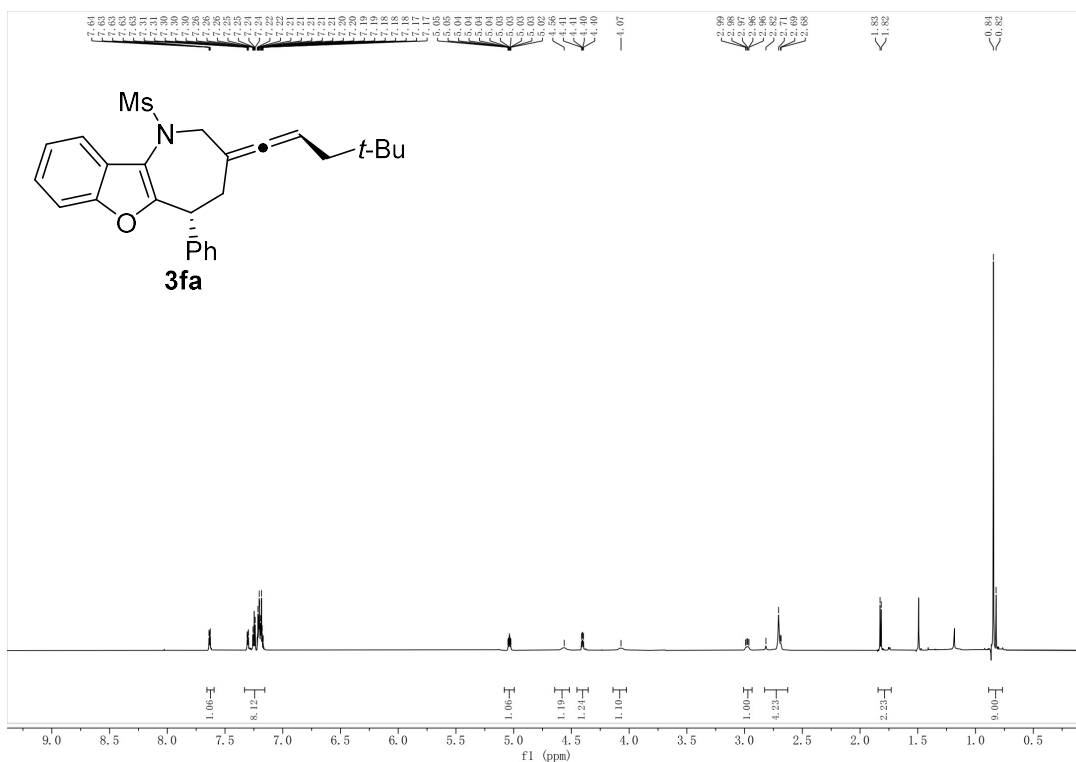

Figure S23. <sup>1</sup>H NMR spectrum of compound **3fa** in CDCl<sub>3</sub> at 800 MHz.

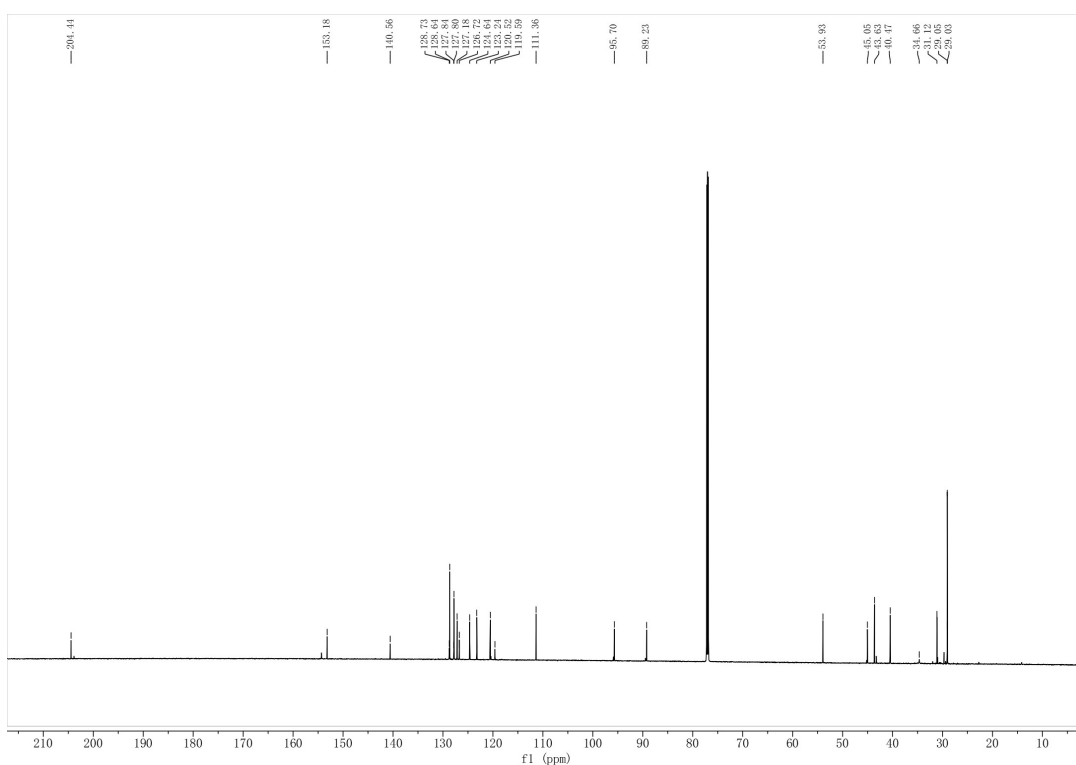

Figure S24. <sup>13</sup>C NMR spectrum of compound **3fa** in CDCl<sub>3</sub> at 201 MHz.

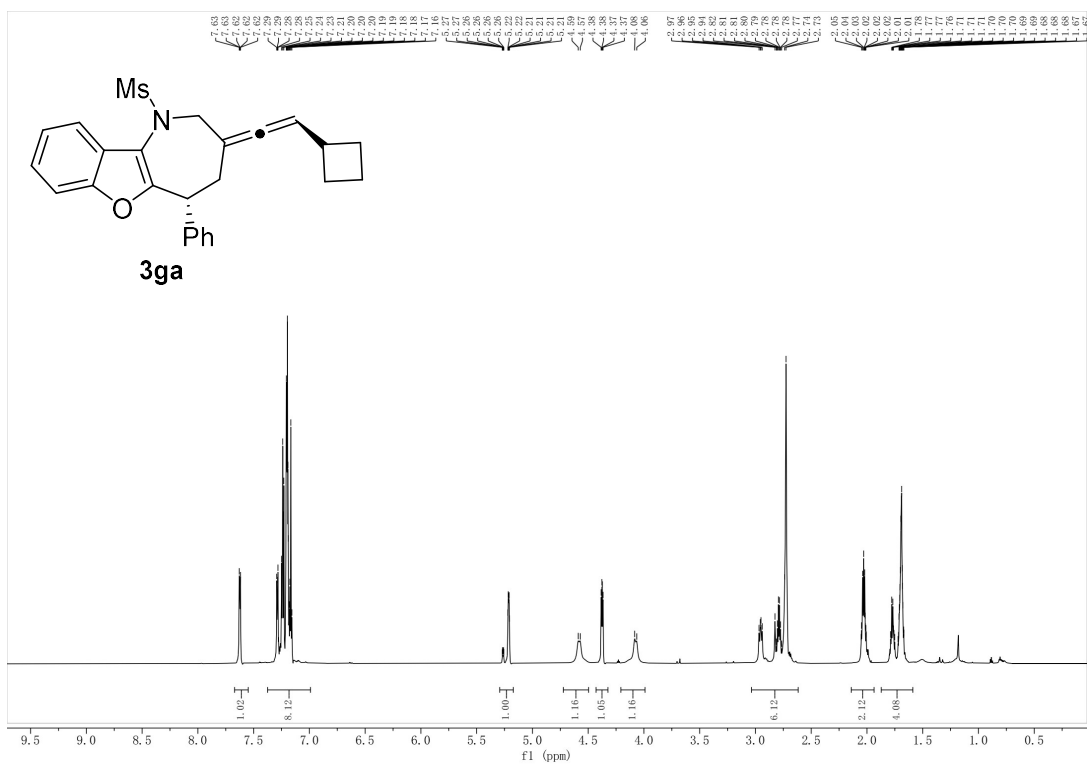

Figure S25. <sup>1</sup>H NMR spectrum of compound **3ga** in CDCl<sub>3</sub> at 800 MHz.

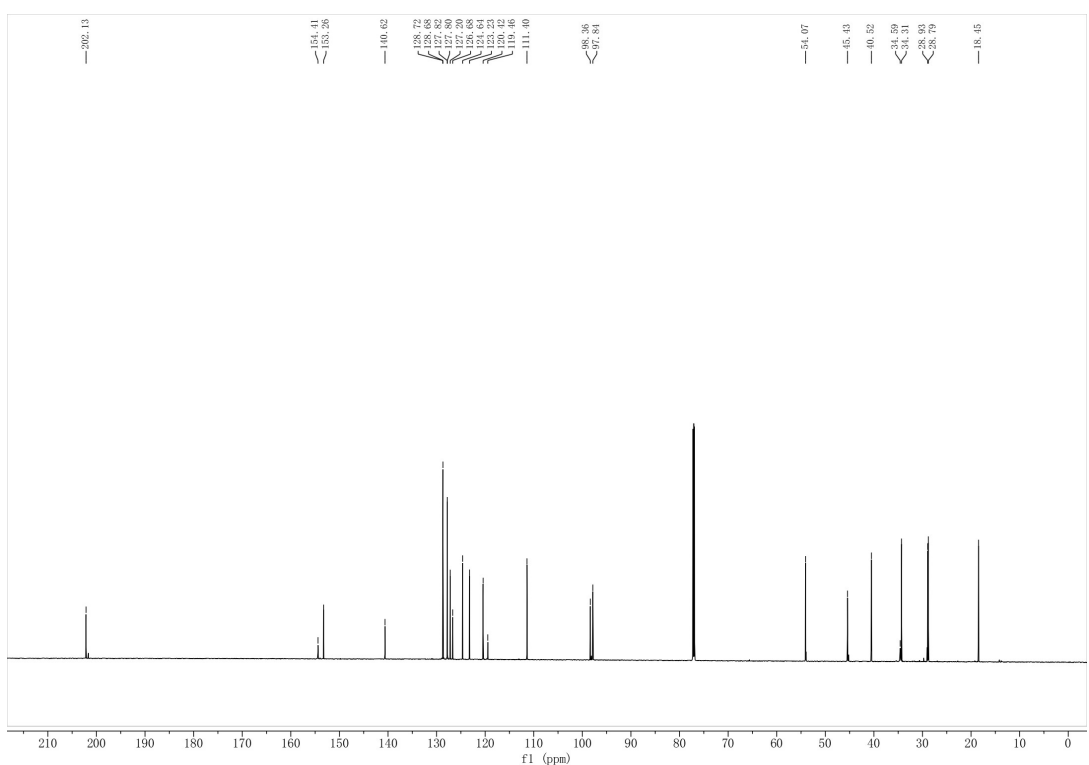

Figure S26. <sup>13</sup>C NMR spectrum of compound **3ga** in CDCl<sub>3</sub> at 201 MHz.

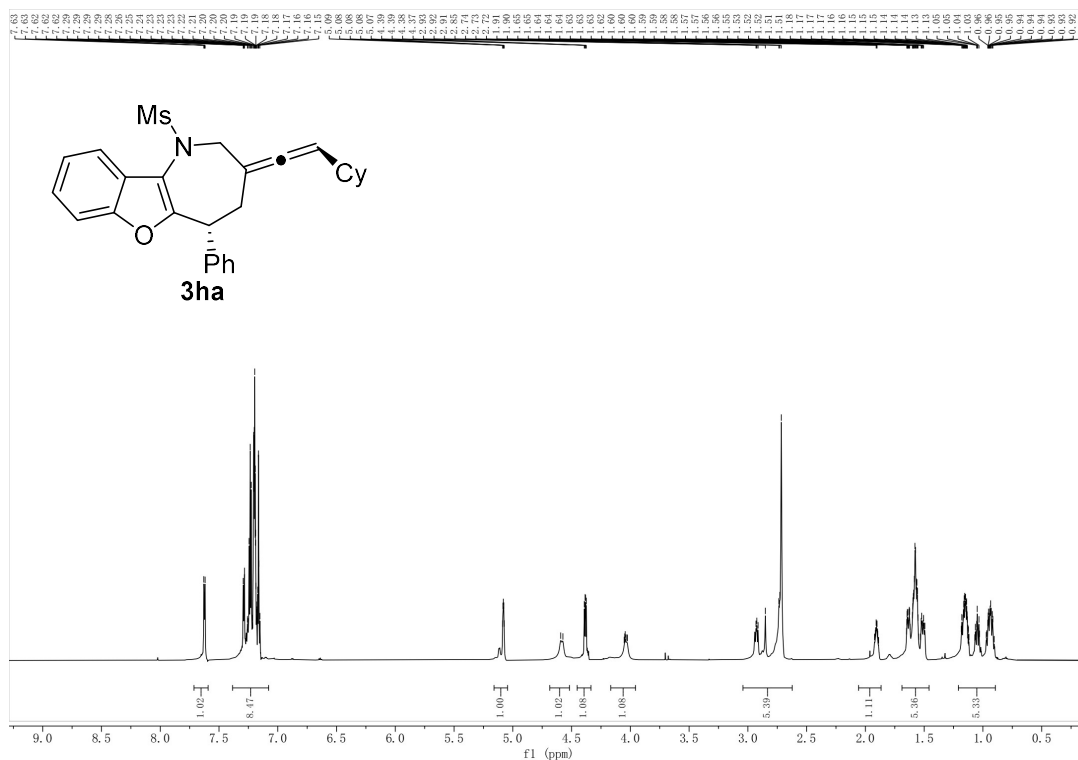

Figure S27. <sup>1</sup>H NMR spectrum of compound **3ha** in CDCl<sub>3</sub> at 800 MHz.

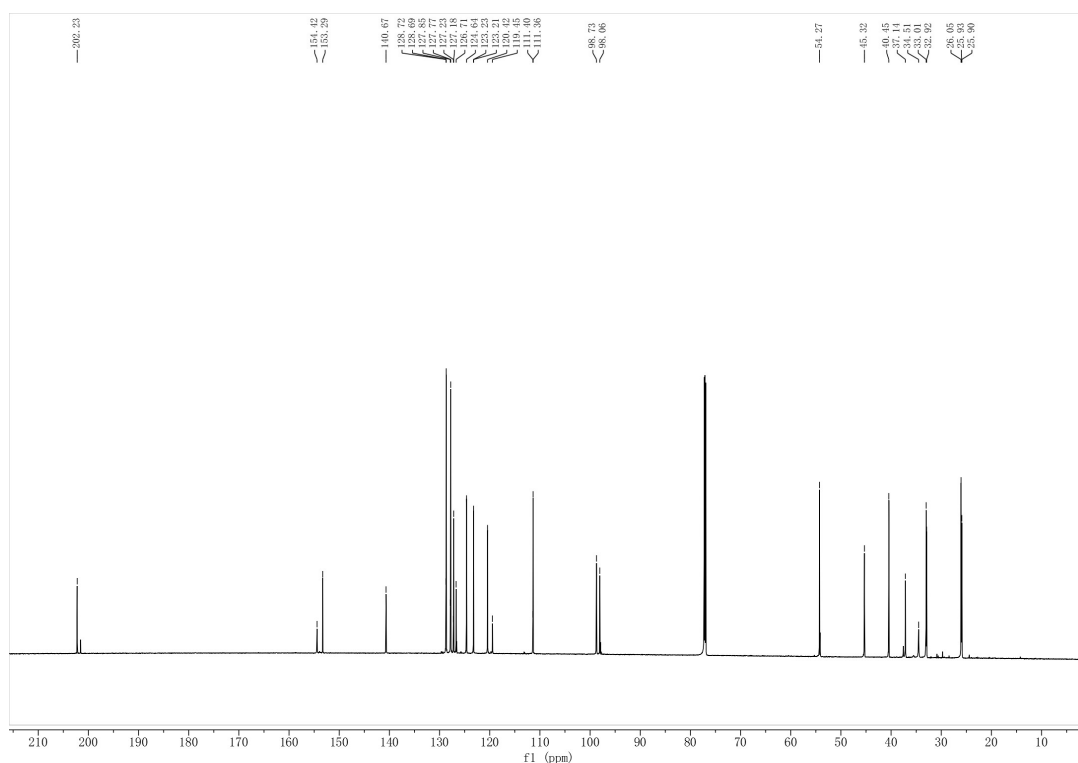

Figure S28. <sup>13</sup>C NMR spectrum of compound **3ha** in CDCl<sub>3</sub> at 201 MHz.



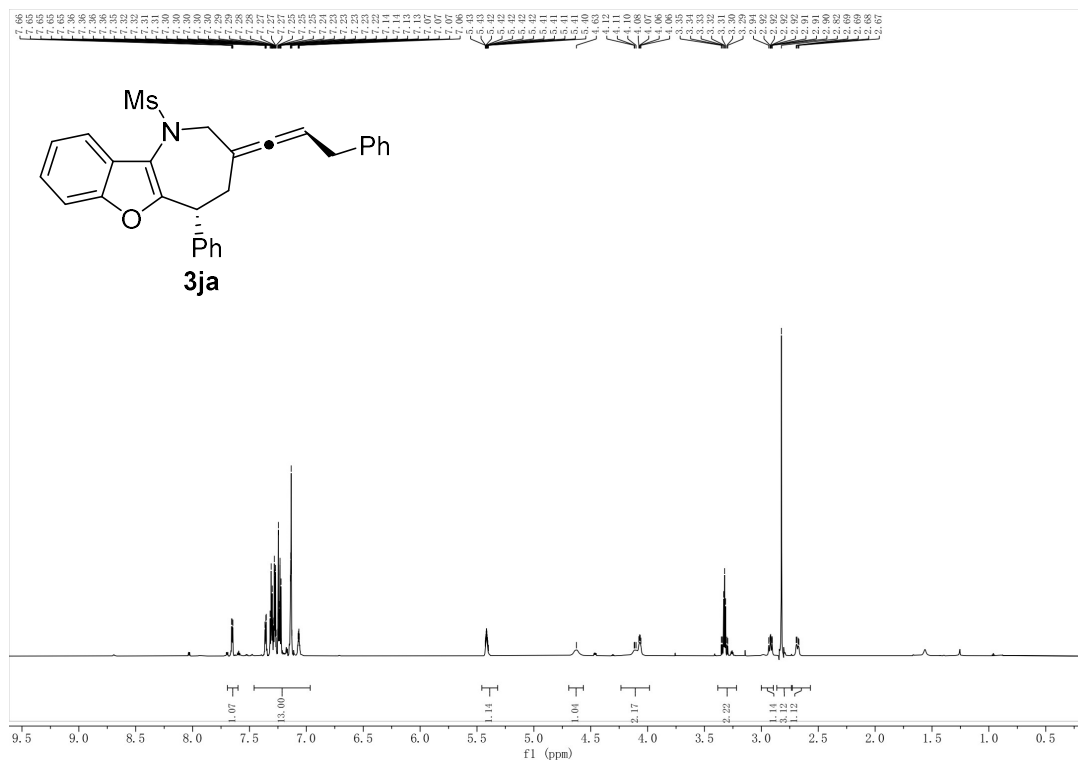

Figure S31.  $^1\text{H}$  NMR spectrum of compound **3ja** in  $\text{CDCl}_3$  at 800 MHz.

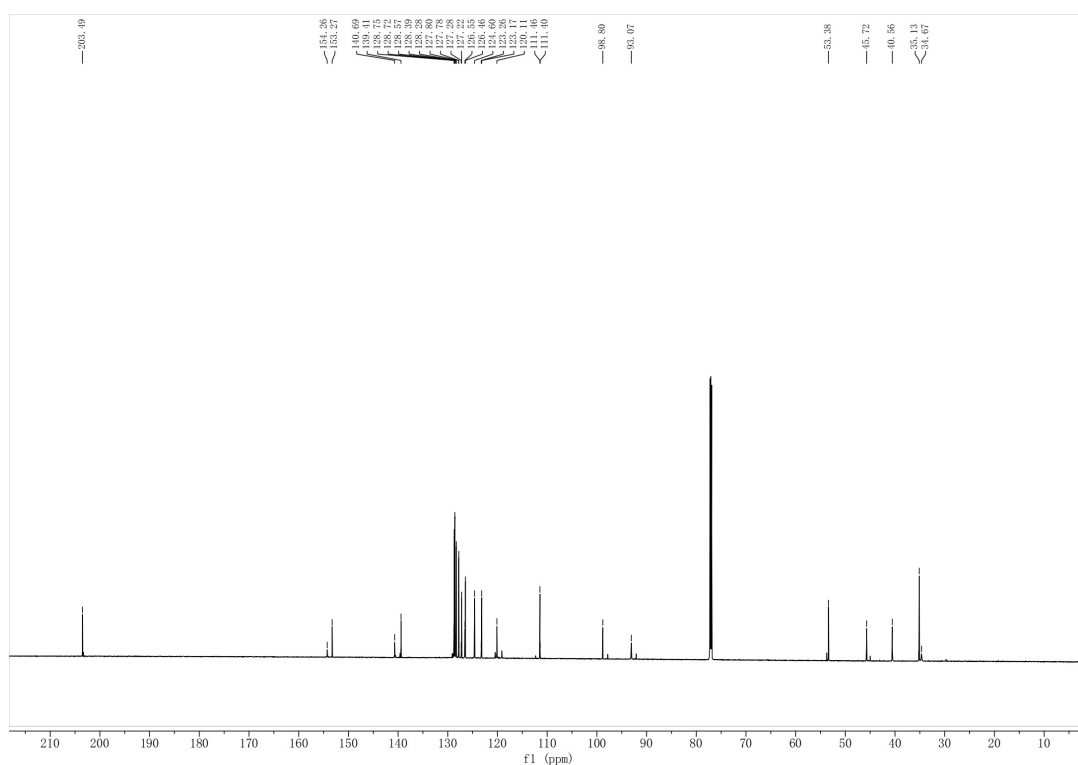

Figure S32.  $^{13}\text{C}$  NMR spectrum of compound **3ja** in  $\text{CDCl}_3$  at 201 MHz.



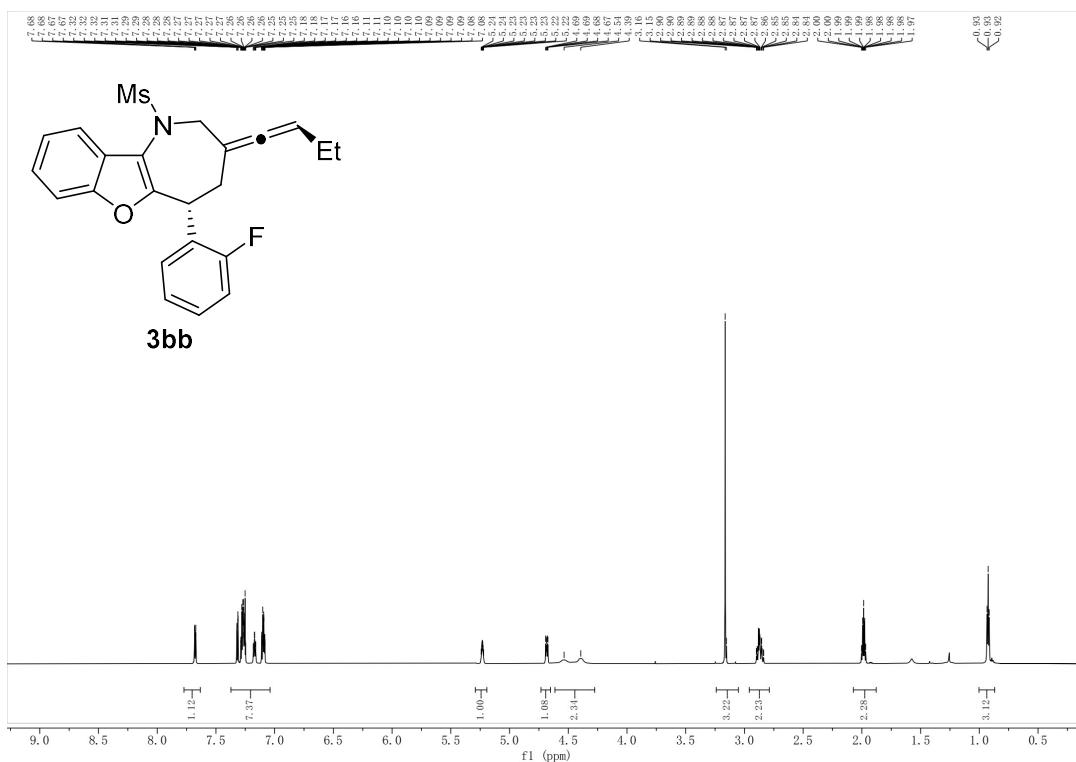

Figure S33. <sup>1</sup>H NMR spectrum of compound **3bb** in CDCl<sub>3</sub> at 800 MHz.

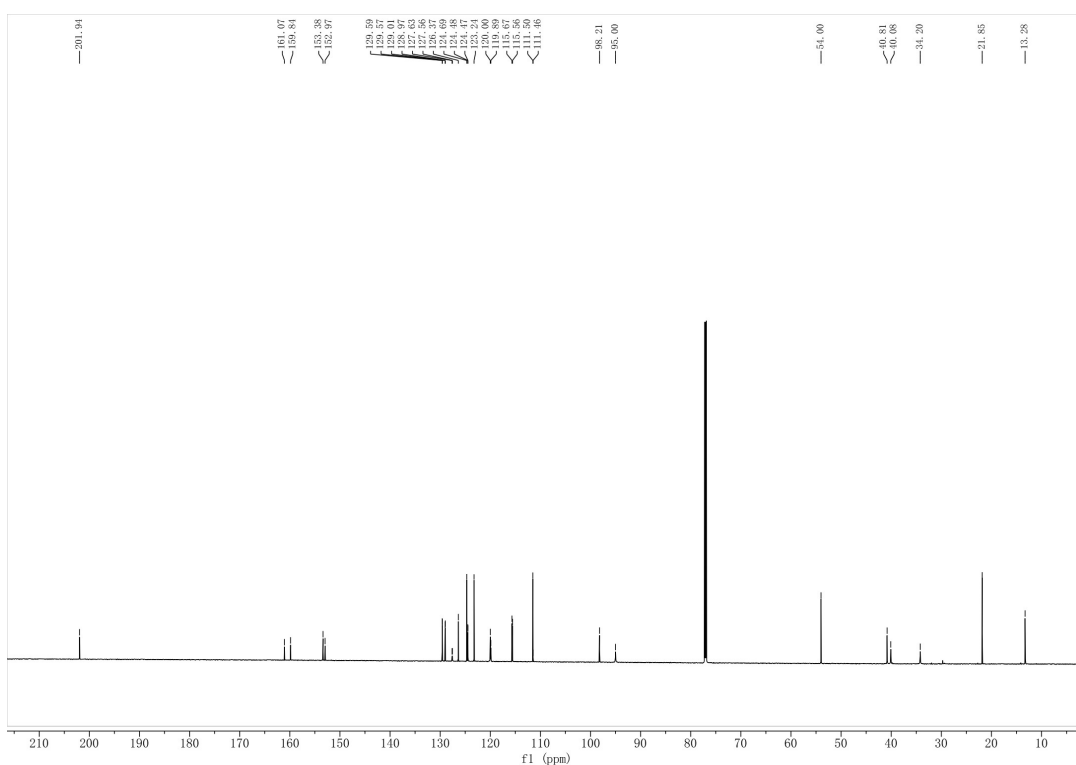

Figure S34. <sup>13</sup>C NMR spectrum of compound **3bb** in CDCl<sub>3</sub> at 201 MHz.



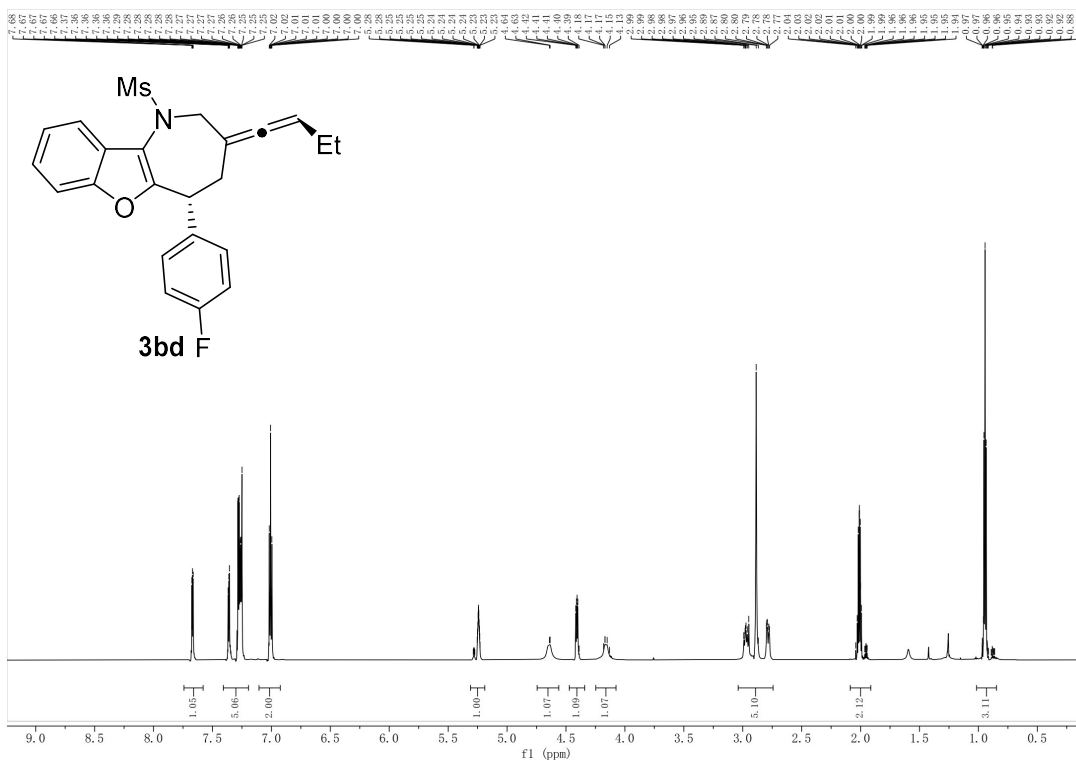

Figure S37. <sup>1</sup>H NMR spectrum of compound **3bd** in CDCl<sub>3</sub> at 800 MHz.

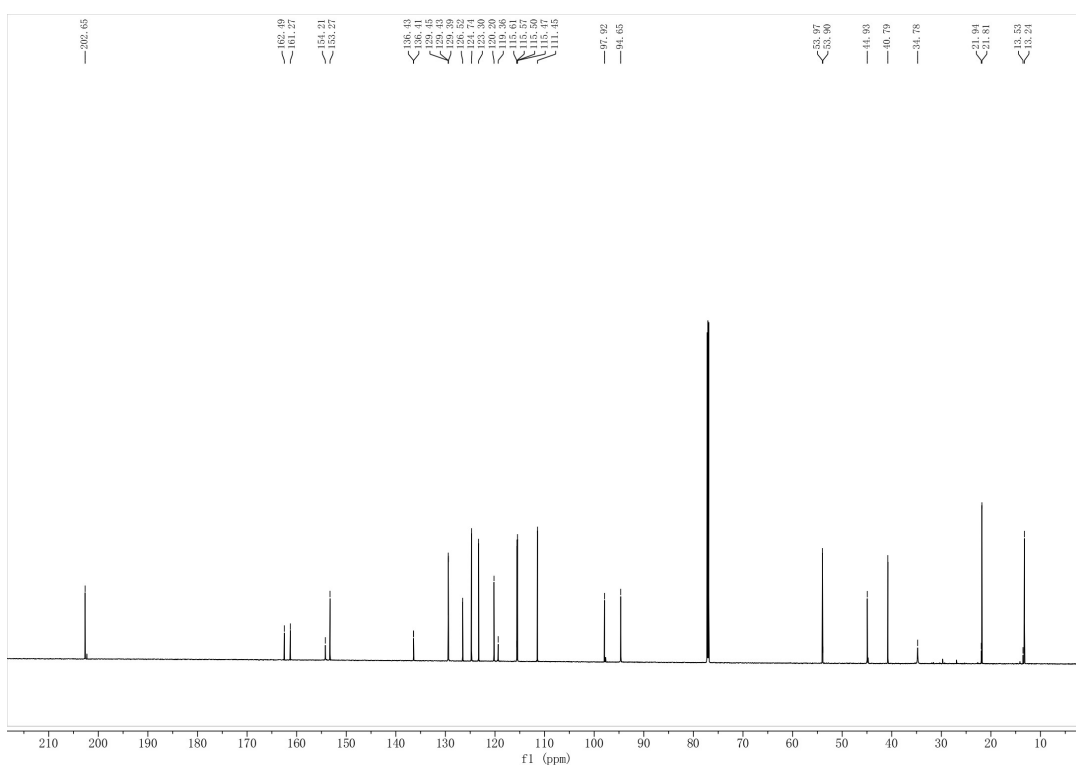

Figure S38. <sup>13</sup>C NMR spectrum of compound **3bd** in CDCl<sub>3</sub> at 201 MHz.

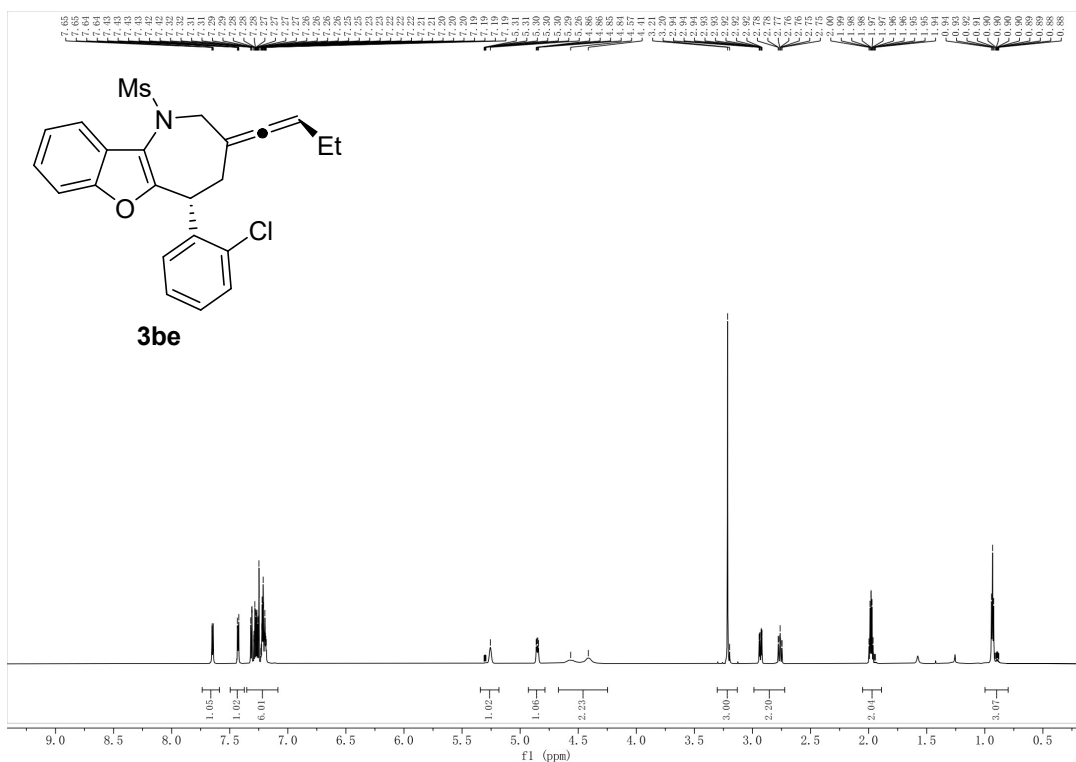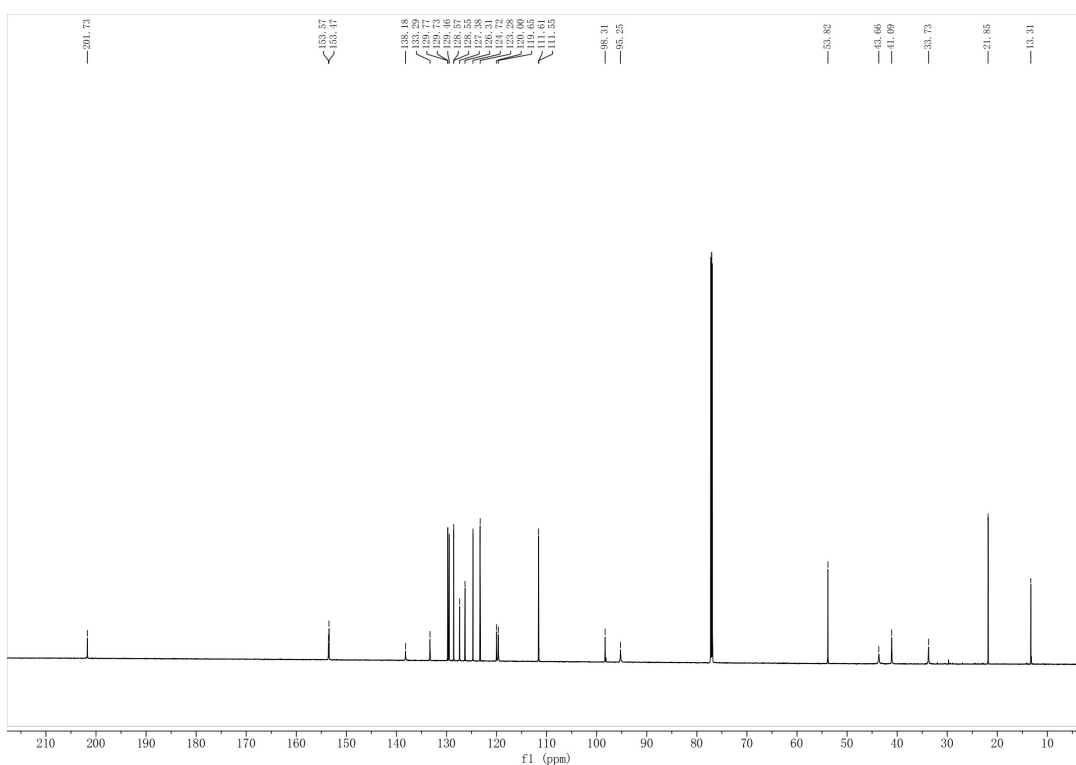



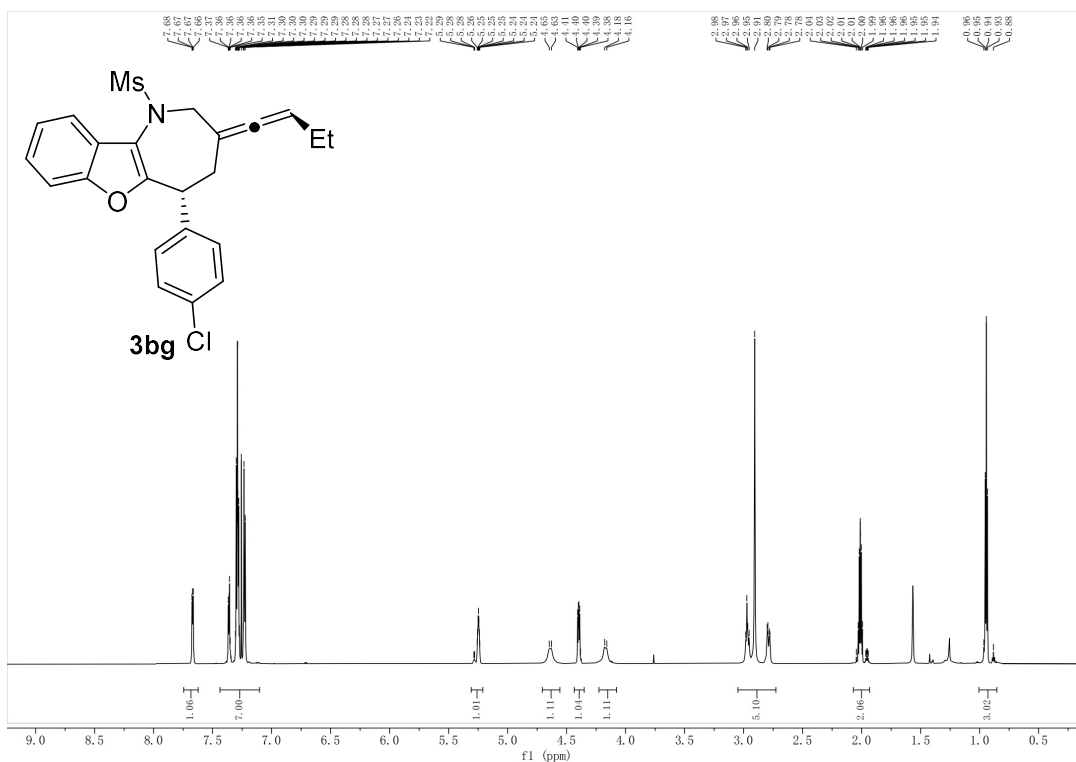

Figure S43.  $^1\text{H}$  NMR spectrum of compound **3bg** in  $\text{CDCl}_3$  at 800 MHz.

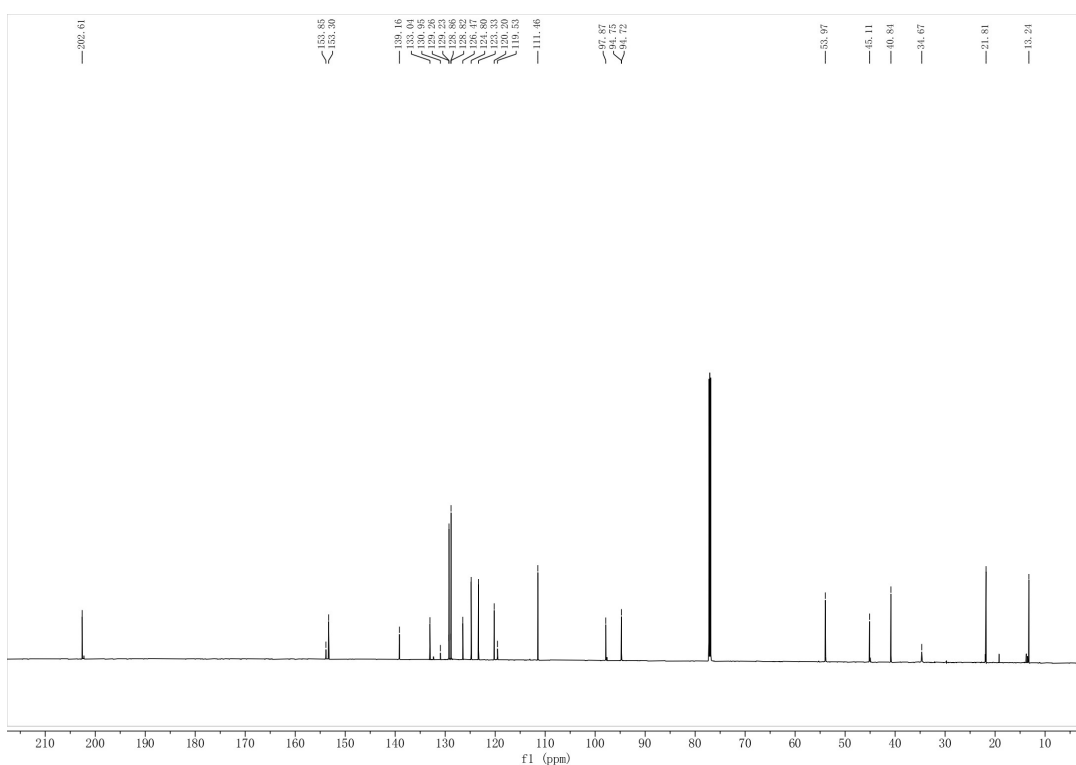

Figure S44.  $^{13}\text{C}$  NMR spectrum of compound **3bg** in  $\text{CDCl}_3$  at 201 MHz.



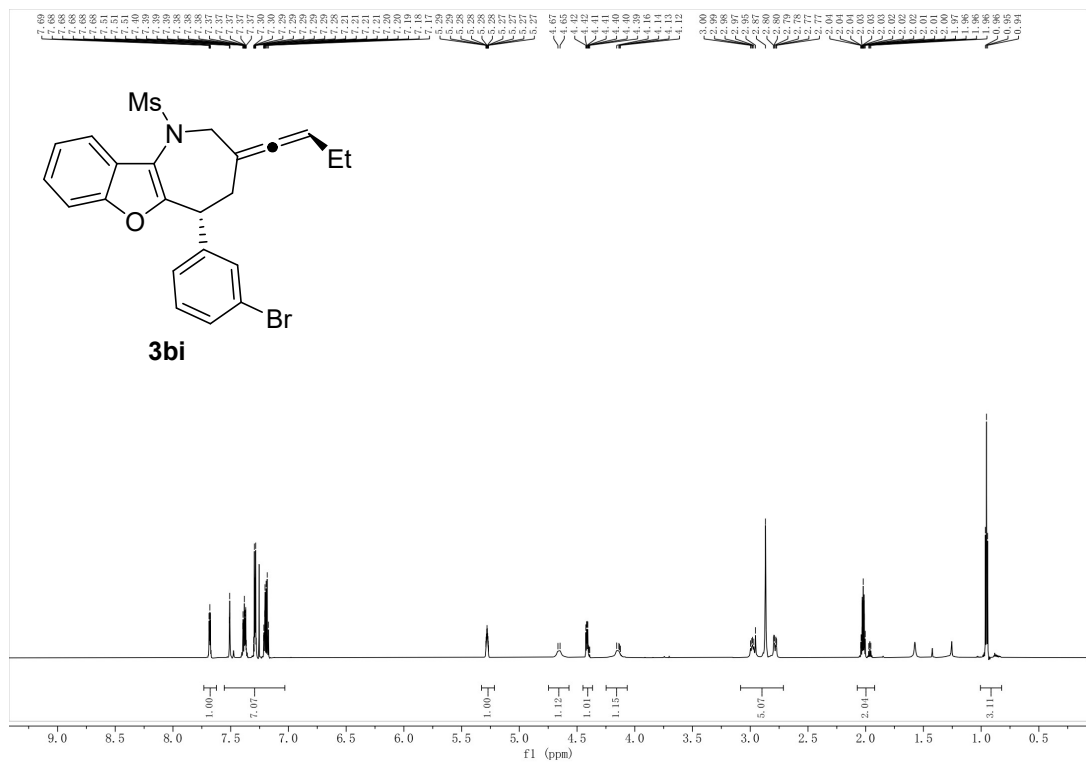

Figure S47. <sup>1</sup>H NMR spectrum of compound **3bi** in CDCl<sub>3</sub> at 800 MHz.

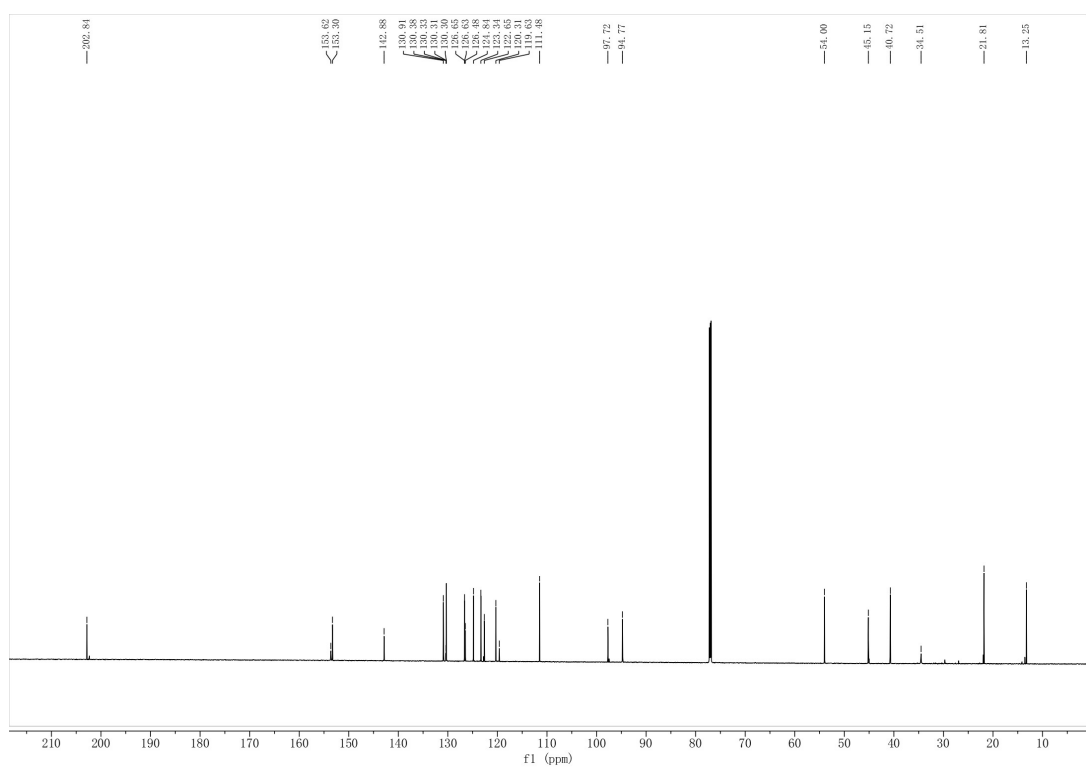

Figure S48. <sup>13</sup>C NMR spectrum of compound **3bi** in CDCl<sub>3</sub> at 201 MHz.



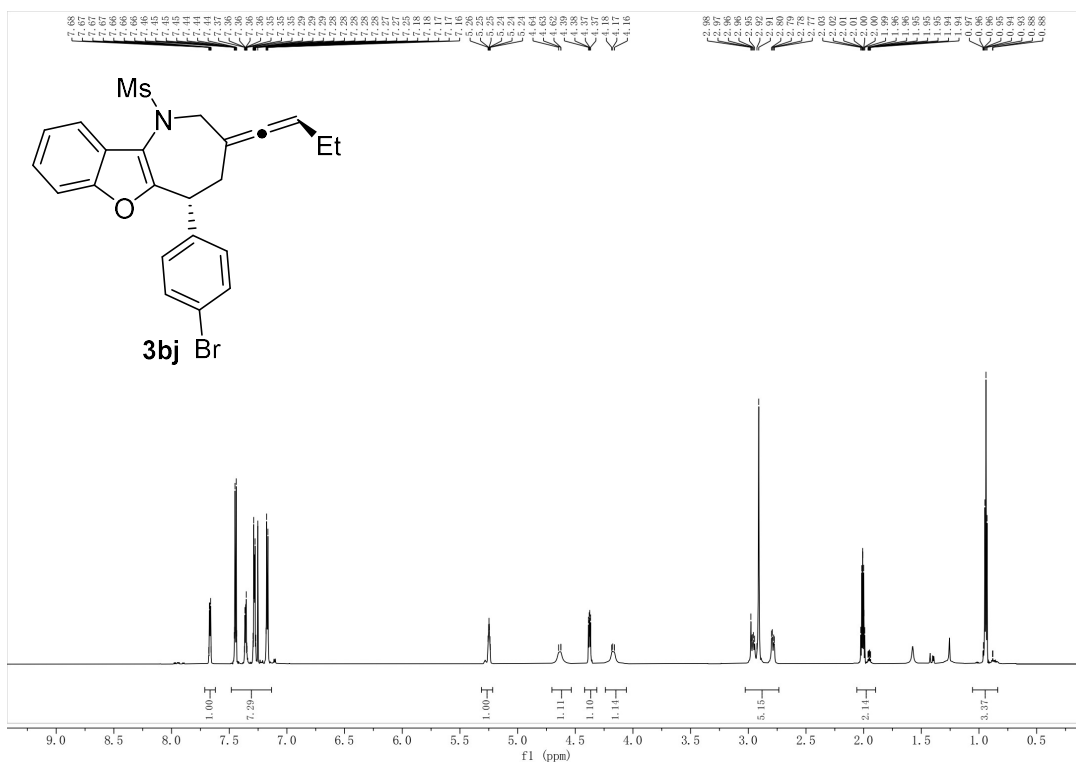

Figure S49. <sup>1</sup>H NMR spectrum of compound **3bj** in CDCl<sub>3</sub> at 800 MHz.

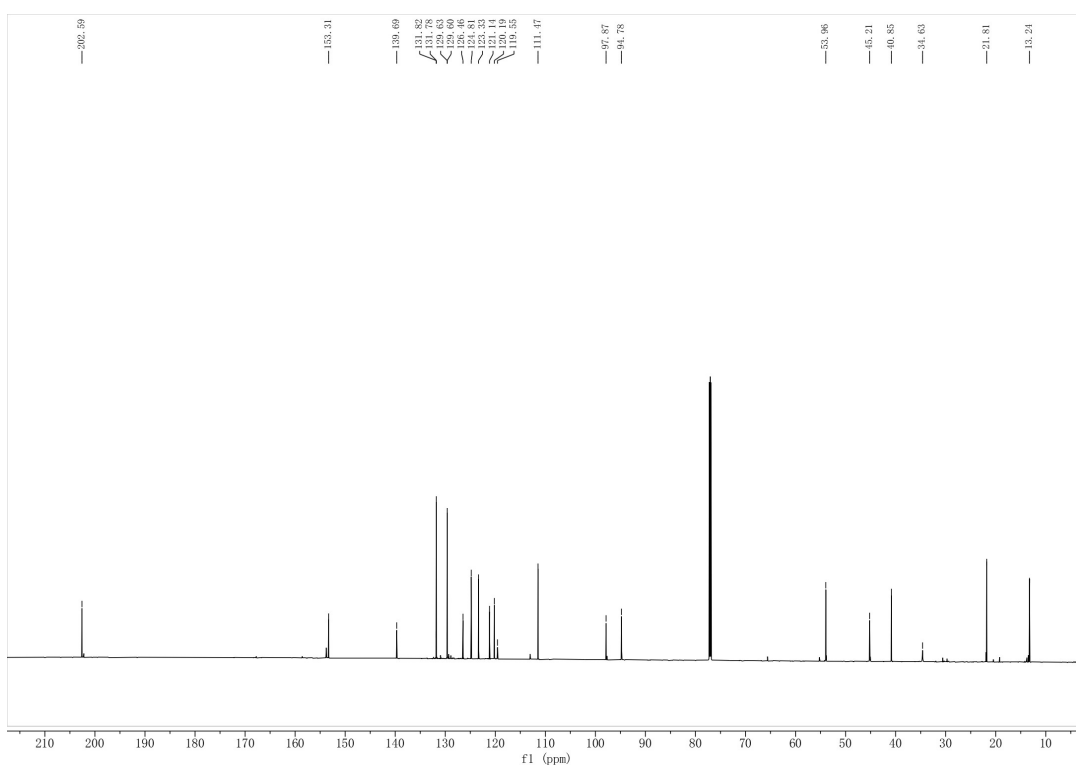

Figure S50. <sup>13</sup>C NMR spectrum of compound **3bj** in CDCl<sub>3</sub> at 201 MHz.

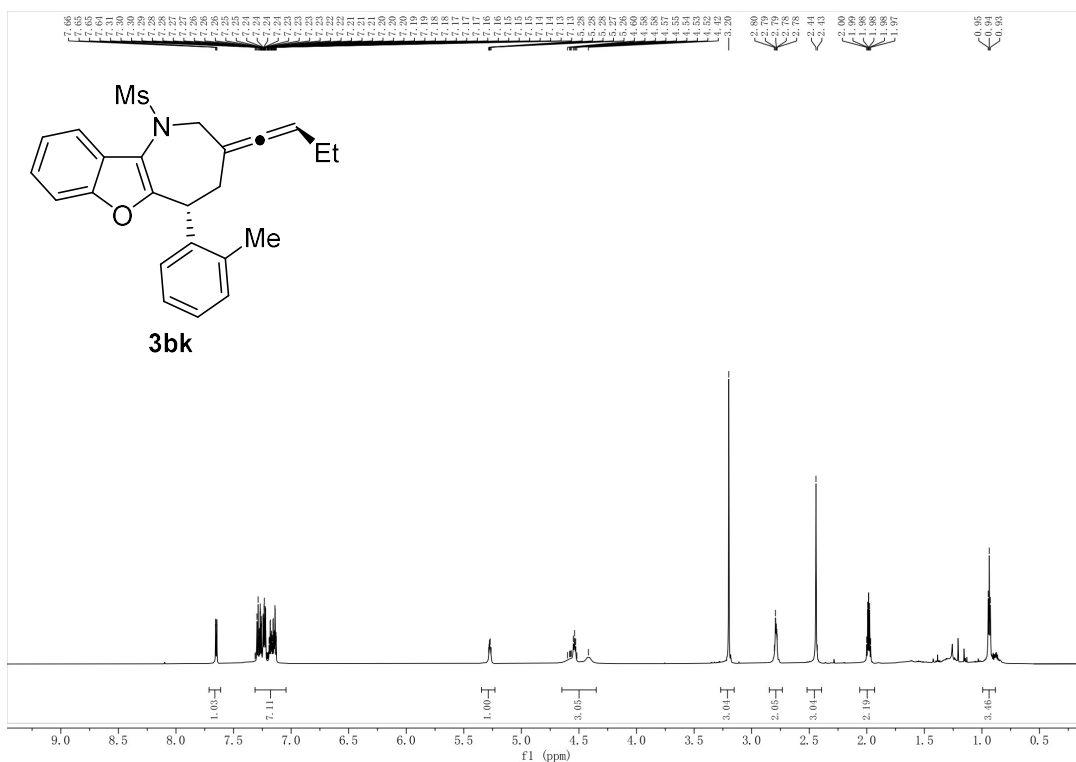

Figure S51. <sup>1</sup>H NMR spectrum of compound **3bk** in CDCl<sub>3</sub> at 800 MHz.

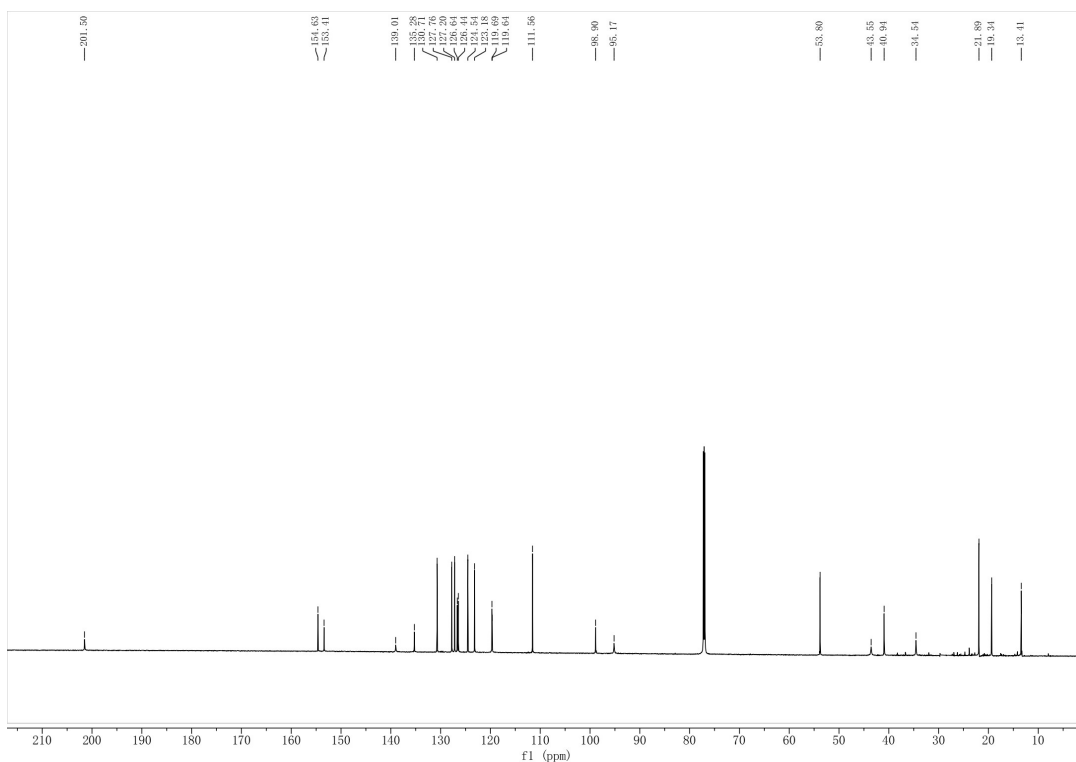

Figure S52. <sup>13</sup>C NMR spectrum of compound **3bk** in CDCl<sub>3</sub> at 201 MHz.

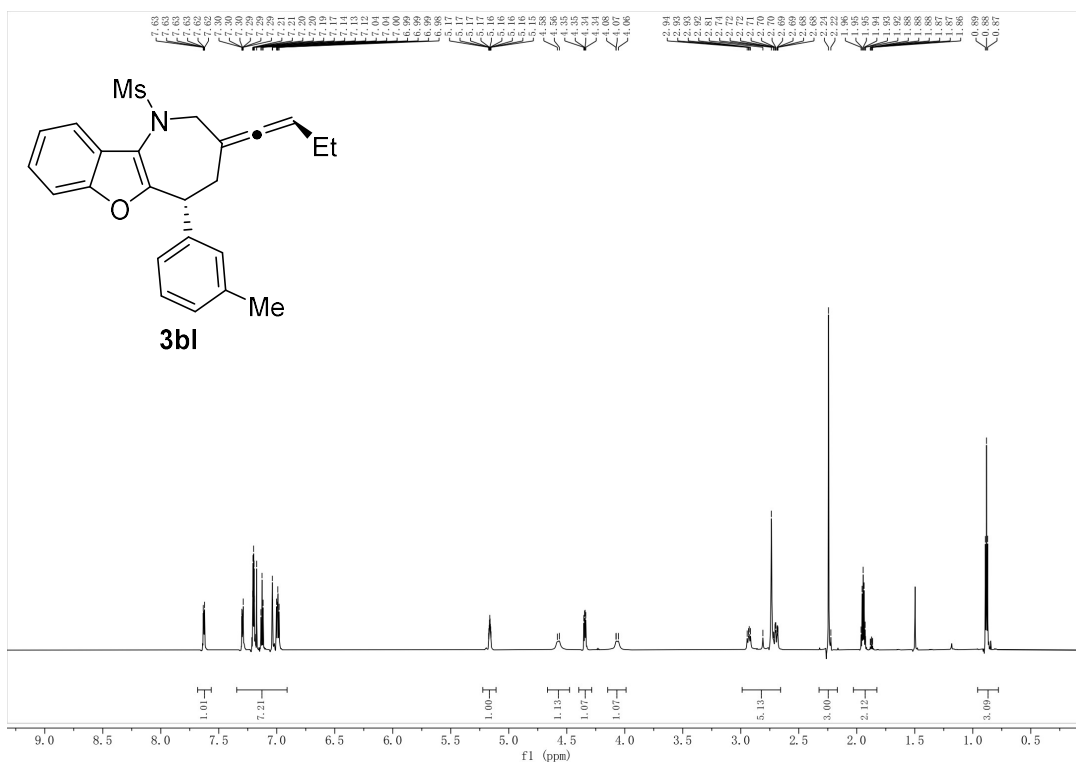

Figure S53. <sup>1</sup>H NMR spectrum of compound **3bl** in CDCl<sub>3</sub> at 800 MHz.

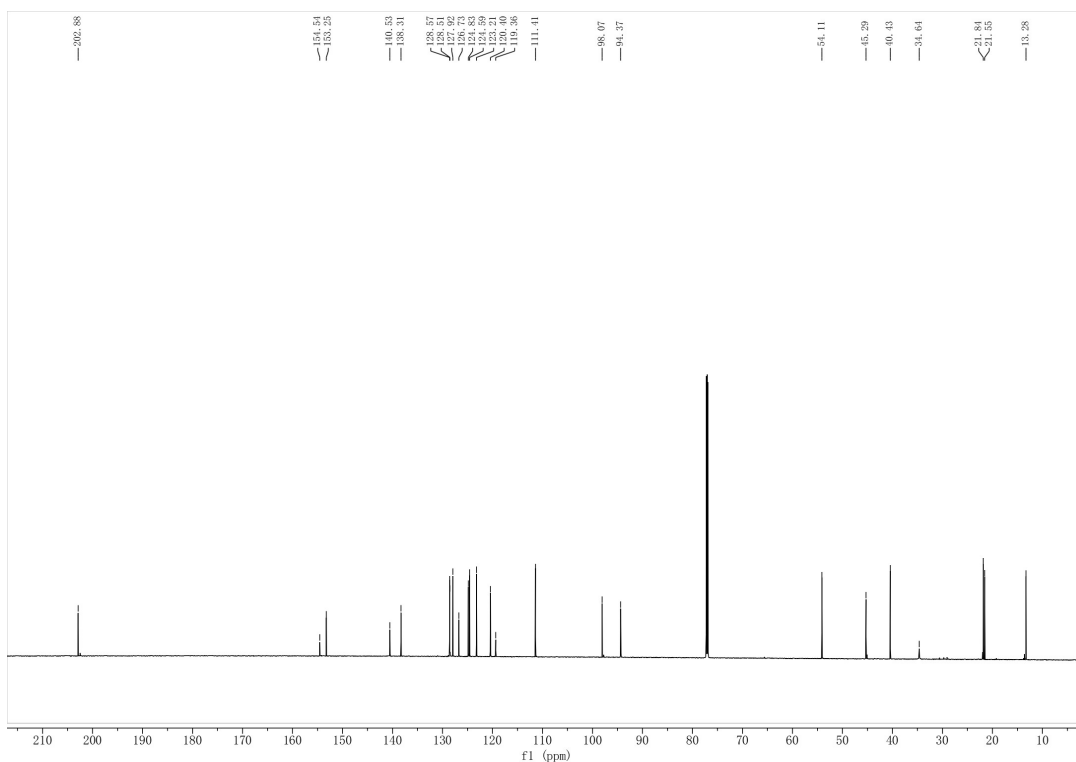

Figure S54. <sup>13</sup>C NMR spectrum of compound **3bl** in CDCl<sub>3</sub> at 201 MHz.

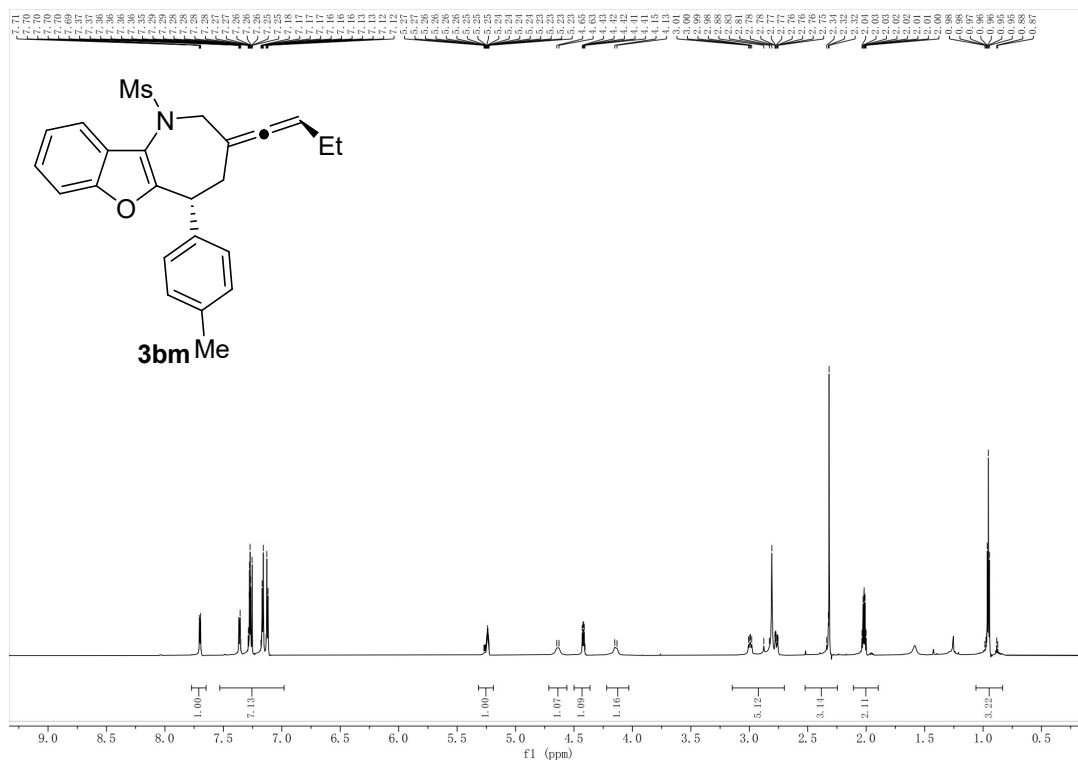

Figure S55. <sup>1</sup>H NMR spectrum of compound **3bm** in CDCl<sub>3</sub> at 800 MHz.

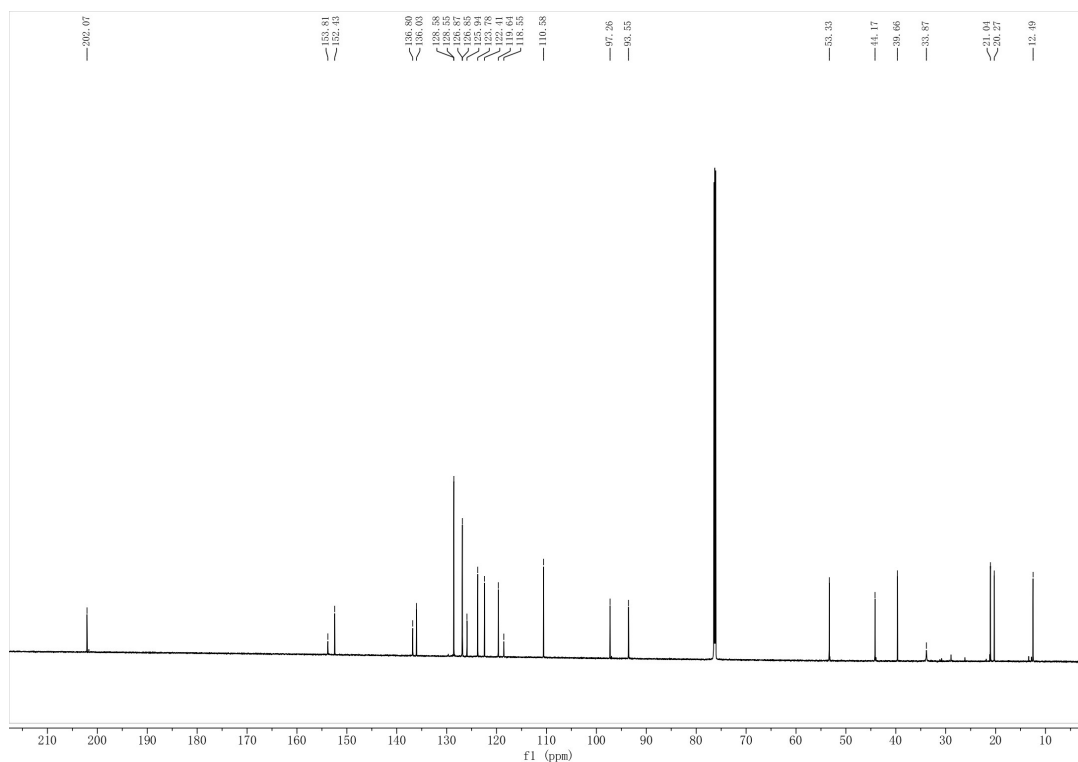

Figure S56. <sup>13</sup>C NMR spectrum of compound **3bm** in CDCl<sub>3</sub> at 201 MHz.

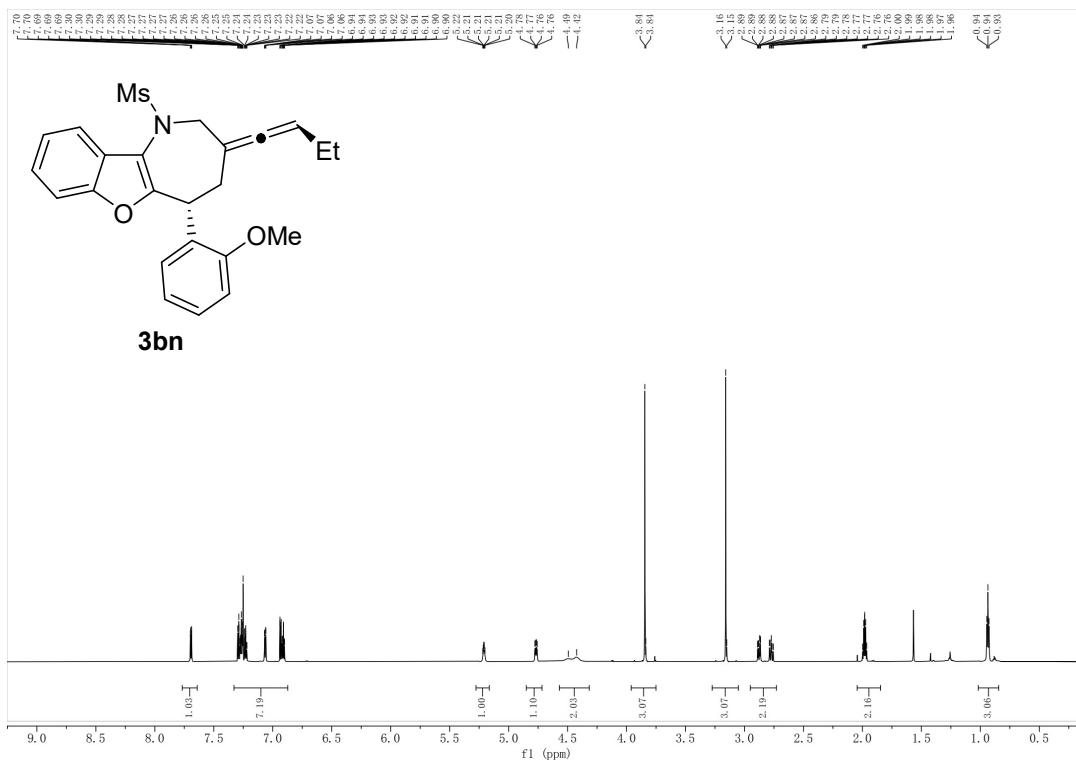

Figure S57. <sup>1</sup>H NMR spectrum of compound **3bn** in CDCl<sub>3</sub> at 800 MHz.

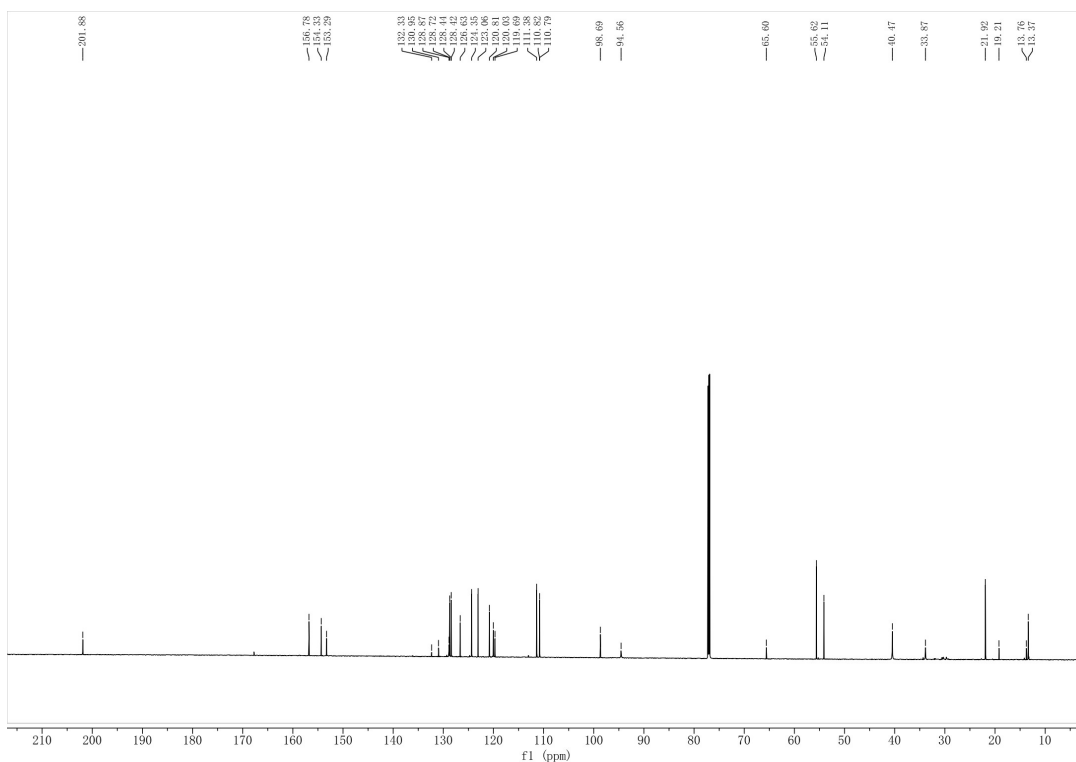

Figure S58. <sup>13</sup>C NMR spectrum of compound **3bn** in CDCl<sub>3</sub> at 201 MHz.

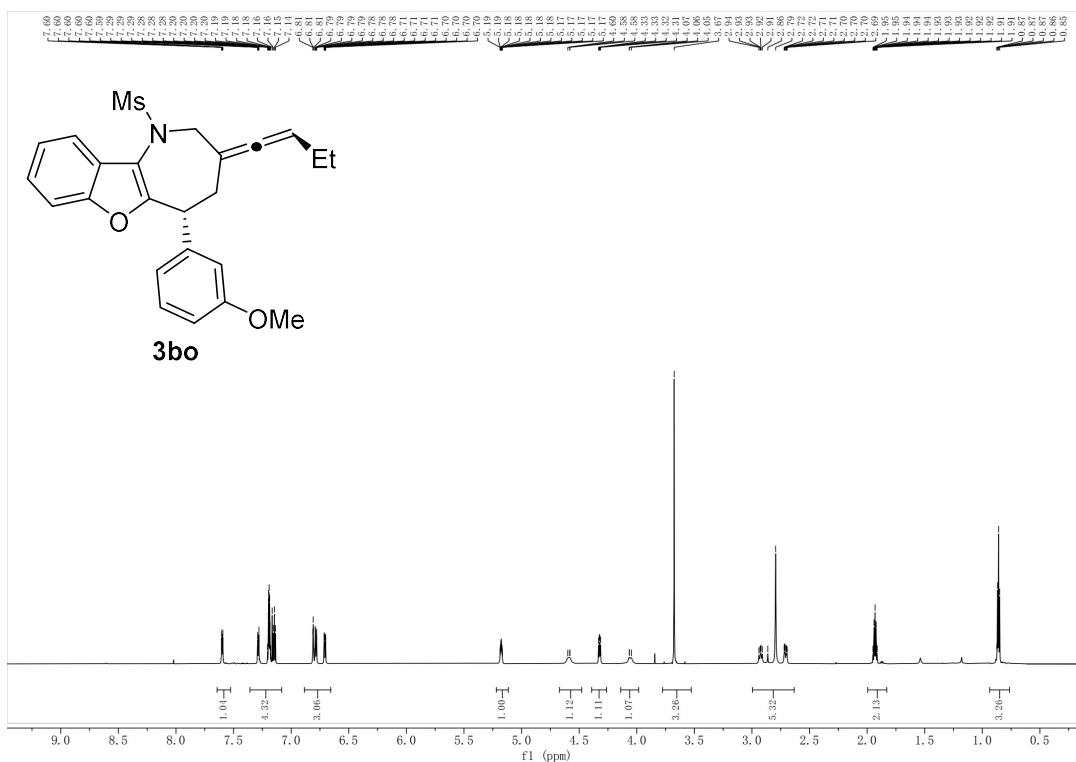

Figure S59. <sup>1</sup>H NMR spectrum of compound **3bo** in CDCl<sub>3</sub> at 800 MHz.

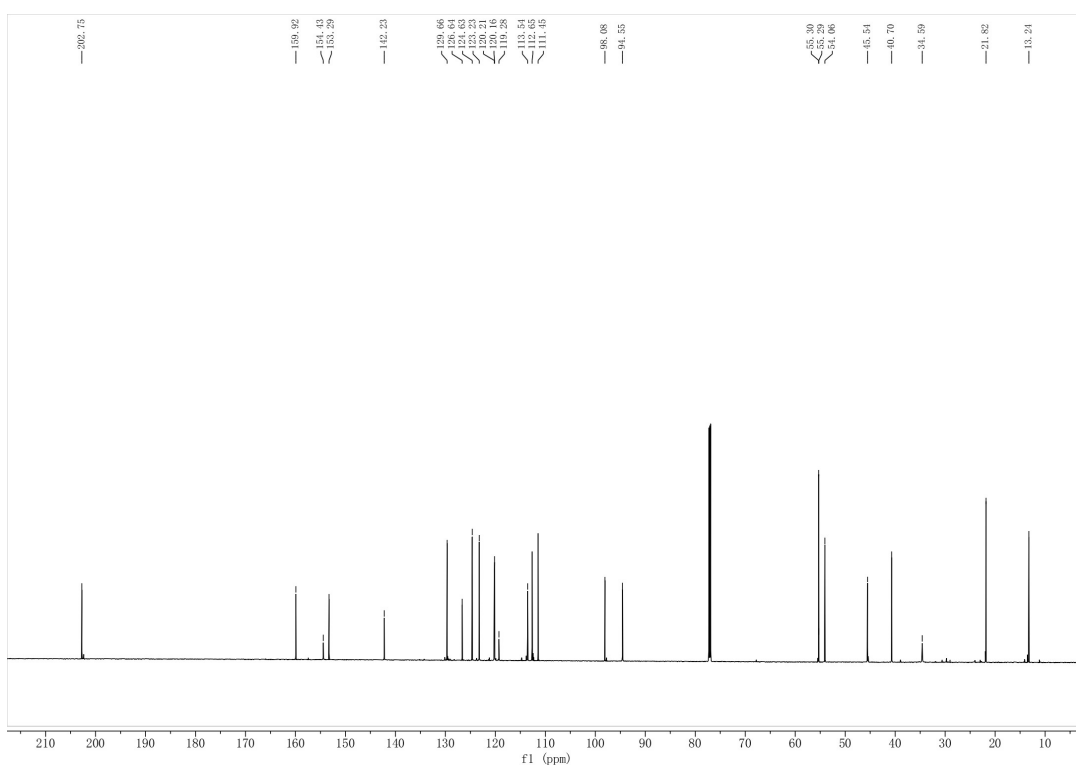

Figure S60. <sup>13</sup>C NMR spectrum of compound **3bo** in CDCl<sub>3</sub> at 201 MHz.

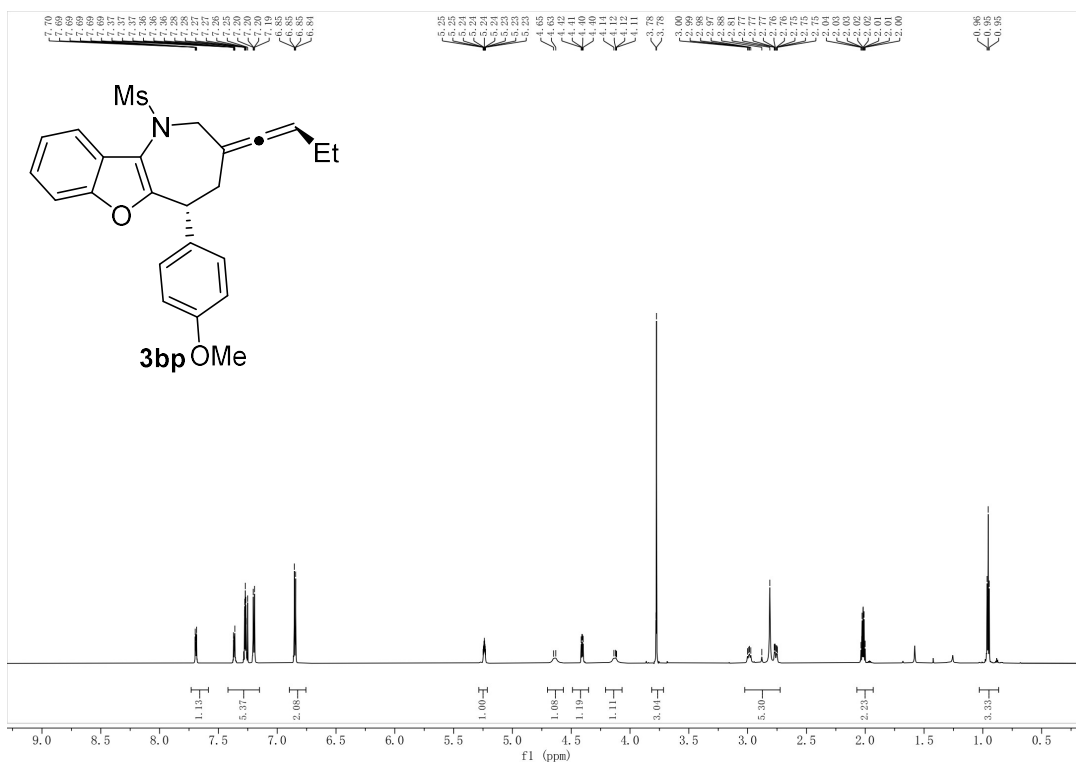

Figure S61. <sup>1</sup>H NMR spectrum of compound **3bp** in CDCl<sub>3</sub> at 800 MHz.

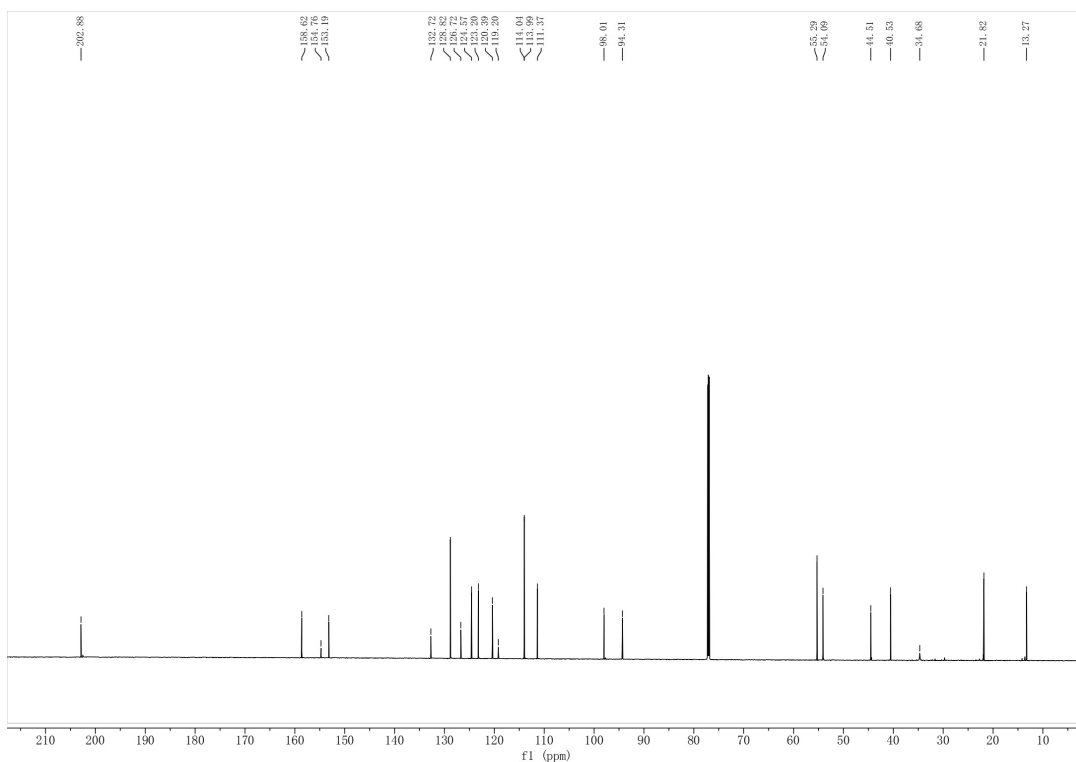

Figure S62. <sup>13</sup>C NMR spectrum of compound **3bp** in CDCl<sub>3</sub> at 201 MHz.

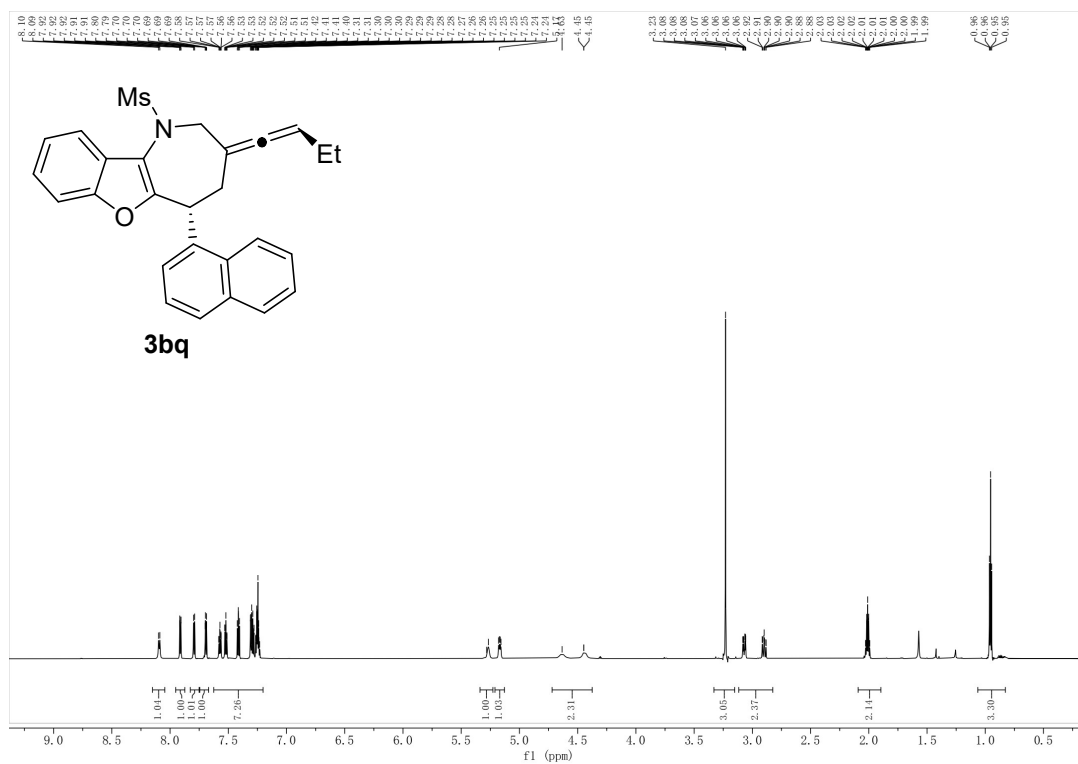

Figure S63. <sup>1</sup>H NMR spectrum of compound **3bq** in CDCl<sub>3</sub> at 800 MHz.

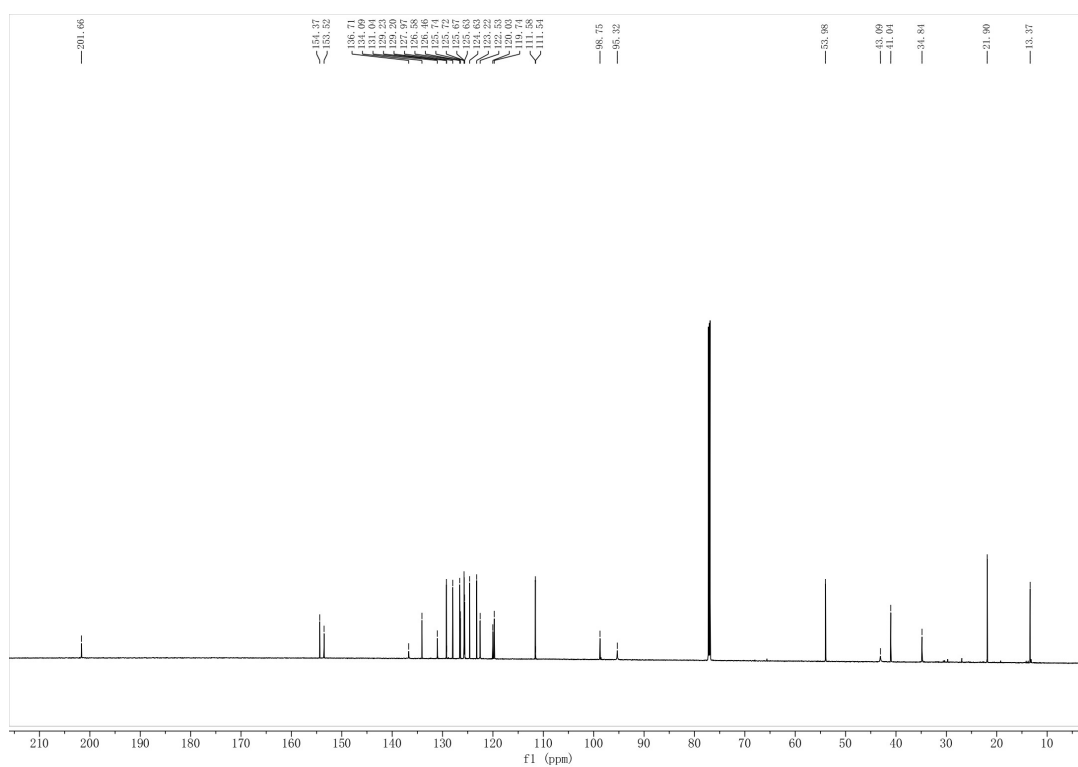

Figure S64. <sup>13</sup>C NMR spectrum of compound **3bq** in CDCl<sub>3</sub> at 201 MHz.



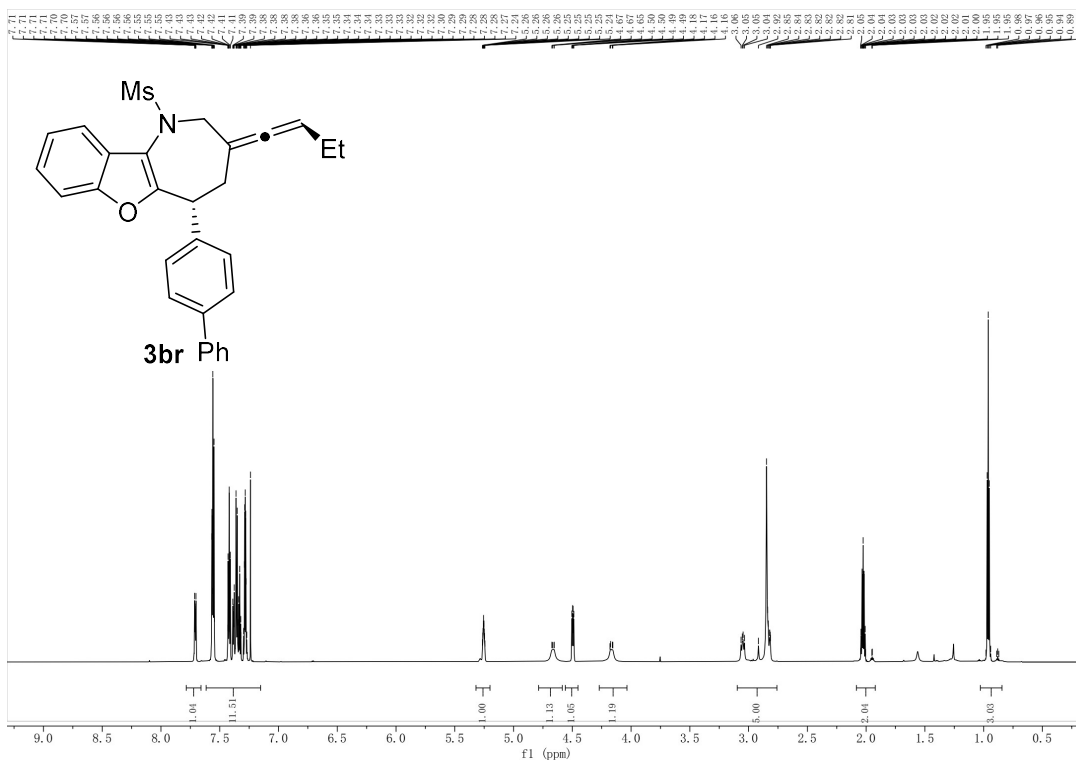

Figure S65. <sup>1</sup>H NMR spectrum of compound **3br** in CDCl<sub>3</sub> at 800 MHz.

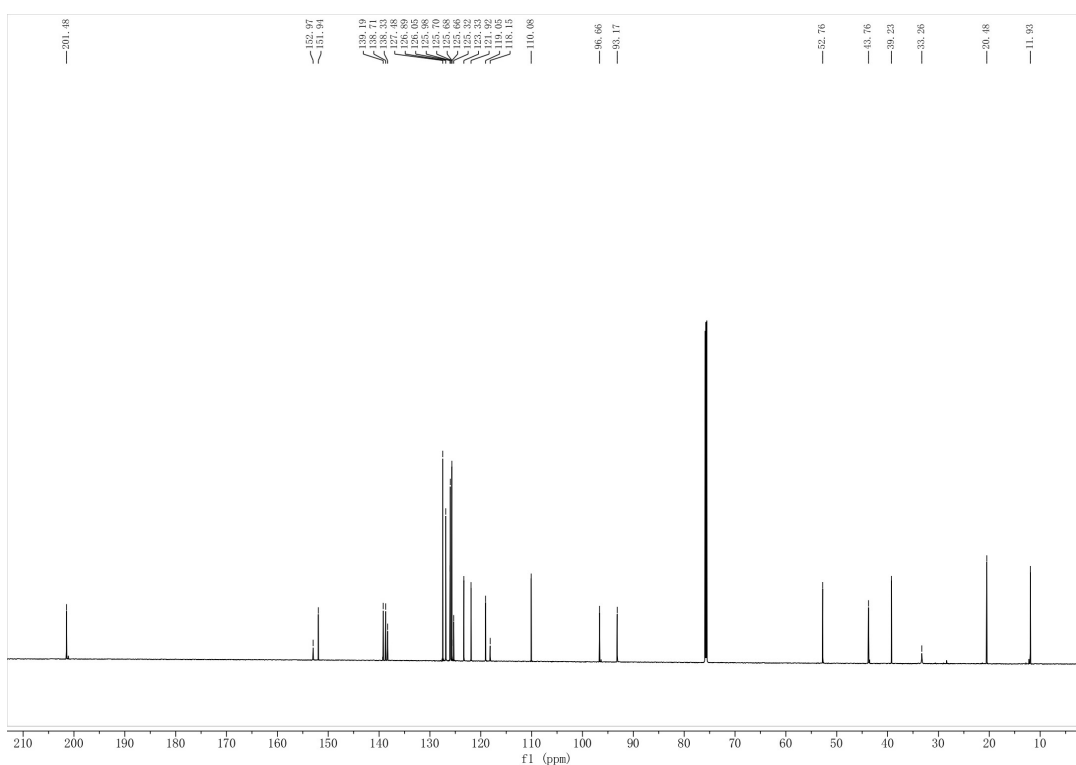

Figure S66. <sup>13</sup>C NMR spectrum of compound **3br** in CDCl<sub>3</sub> at 201 MHz.

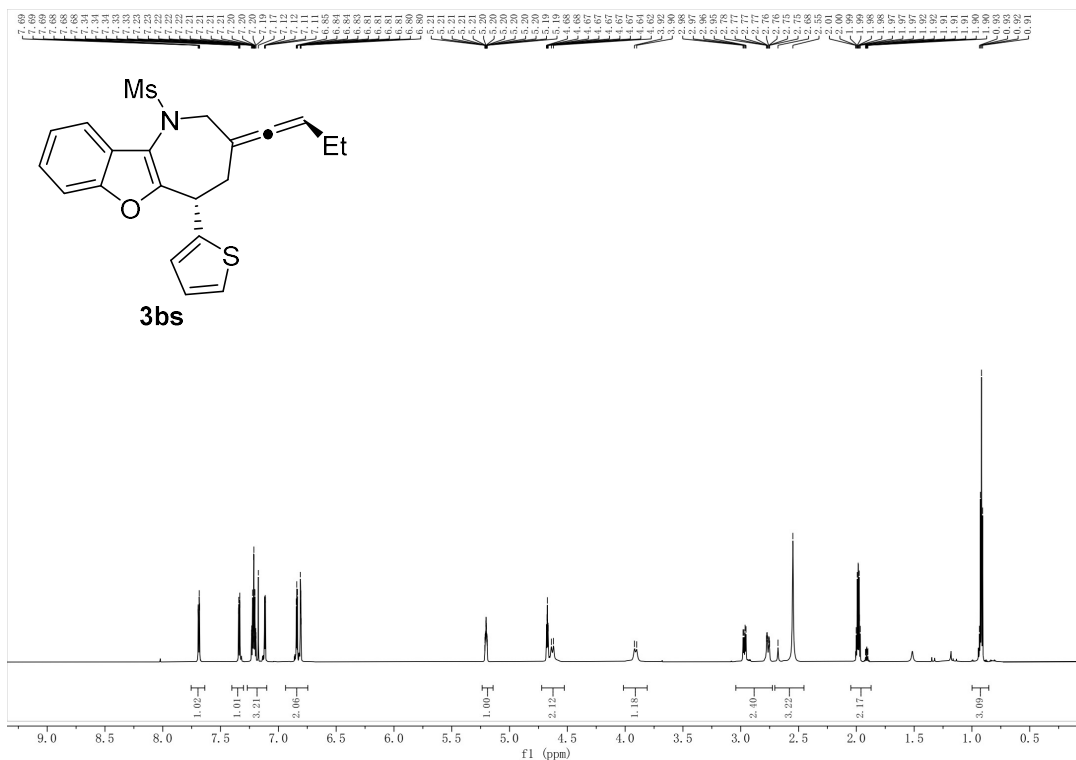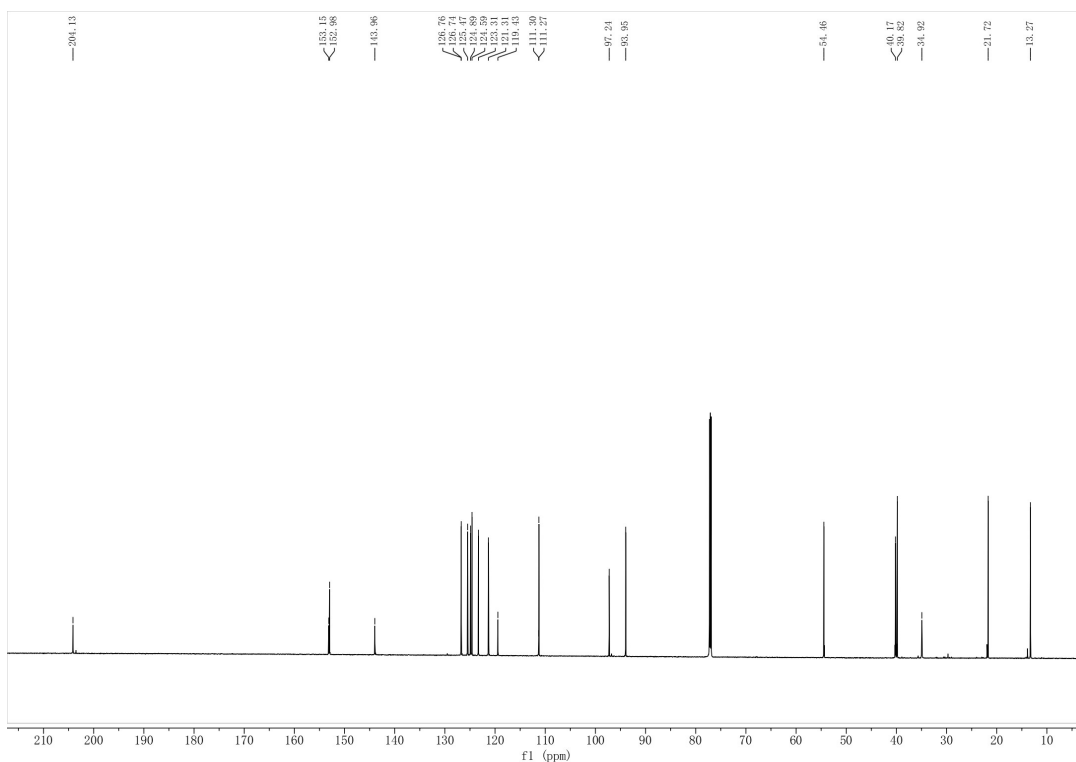

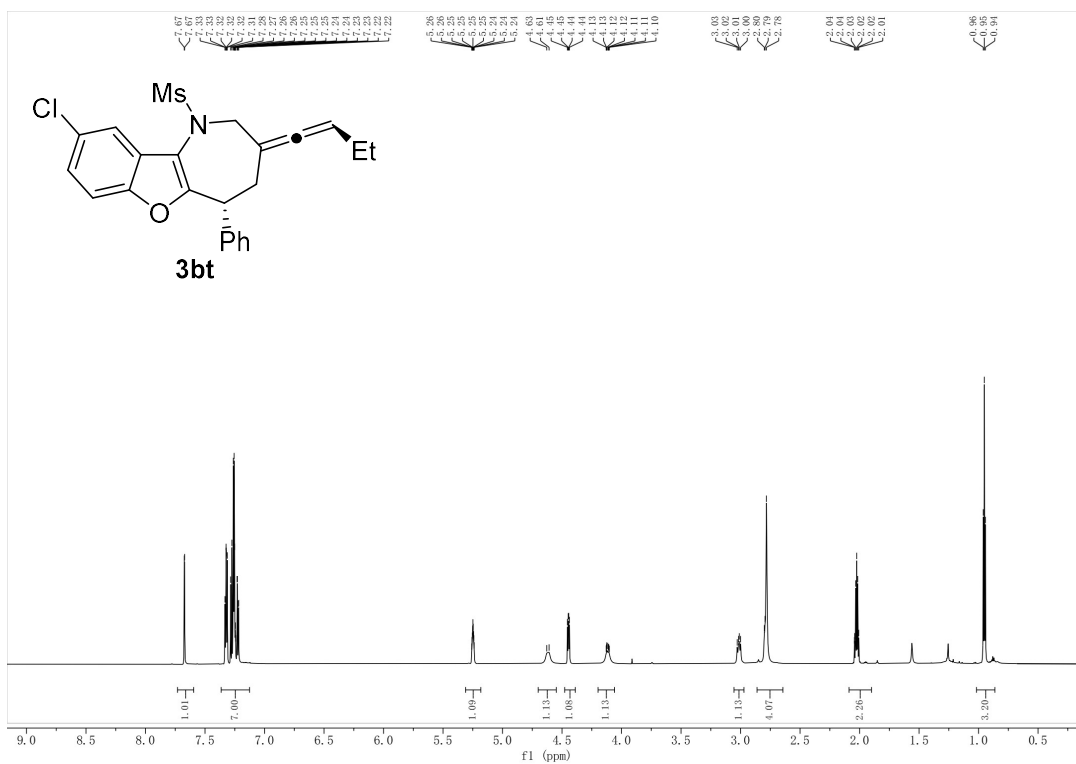

Figure S69. <sup>1</sup>H NMR spectrum of compound **3bt** in CDCl<sub>3</sub> at 800 MHz.

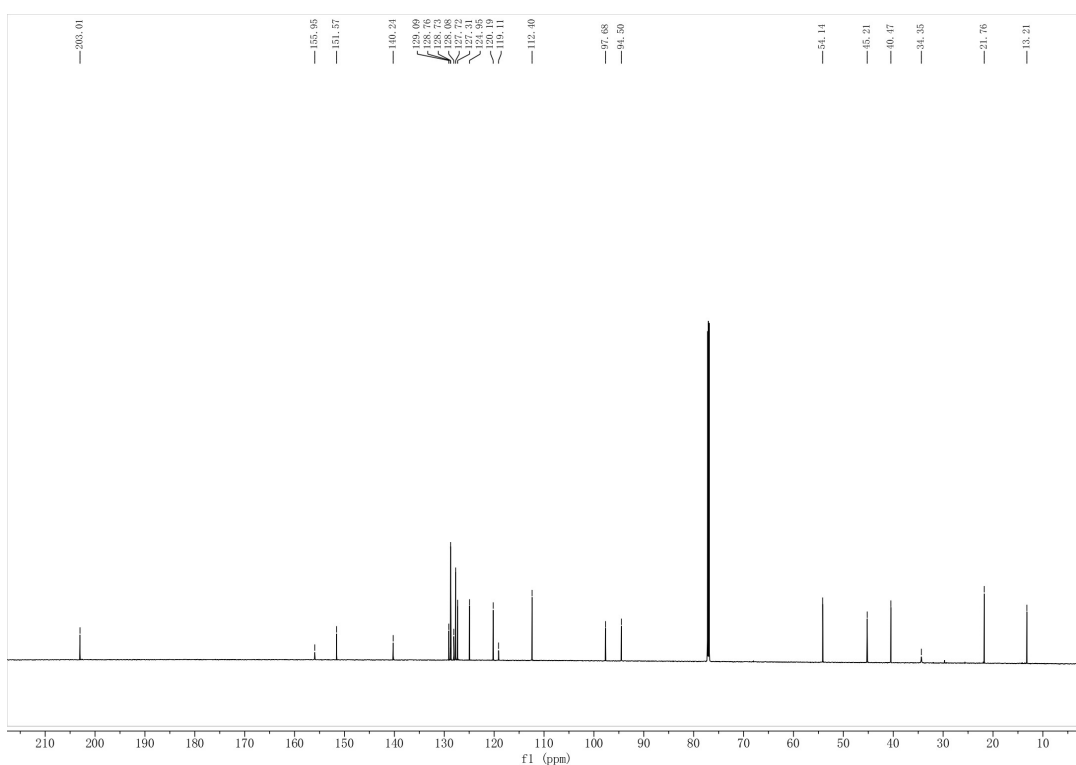

Figure S70. <sup>13</sup>C NMR spectrum of compound **3bt** in CDCl<sub>3</sub> at 201 MHz.

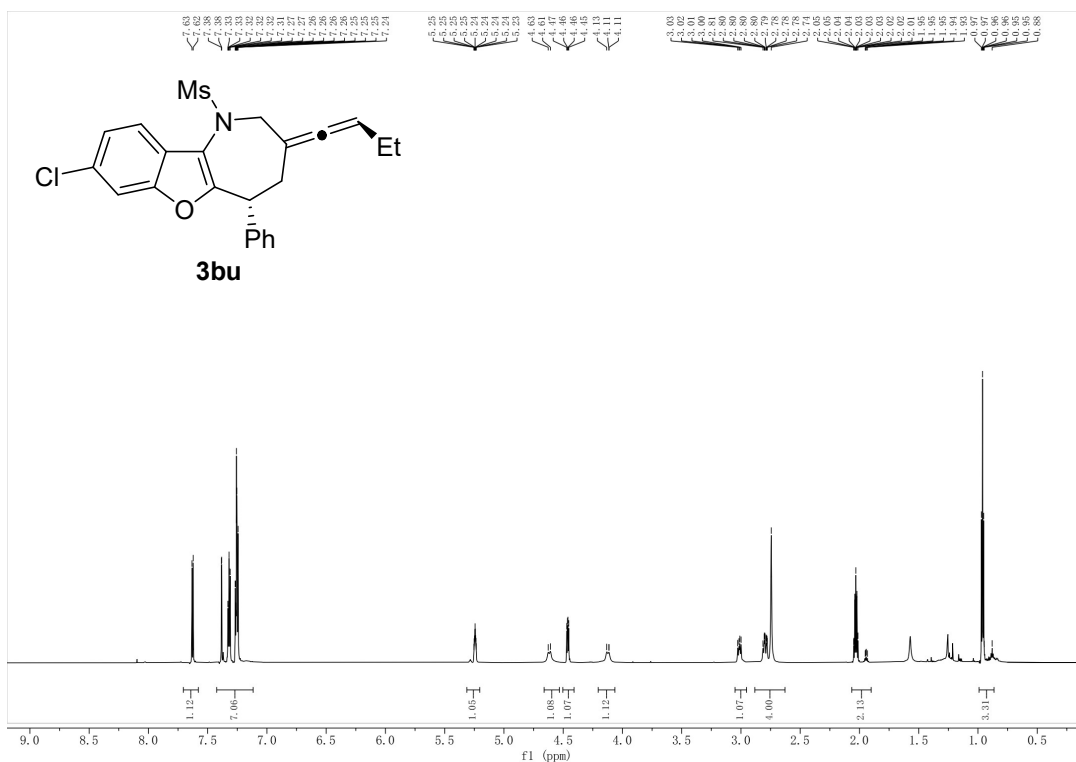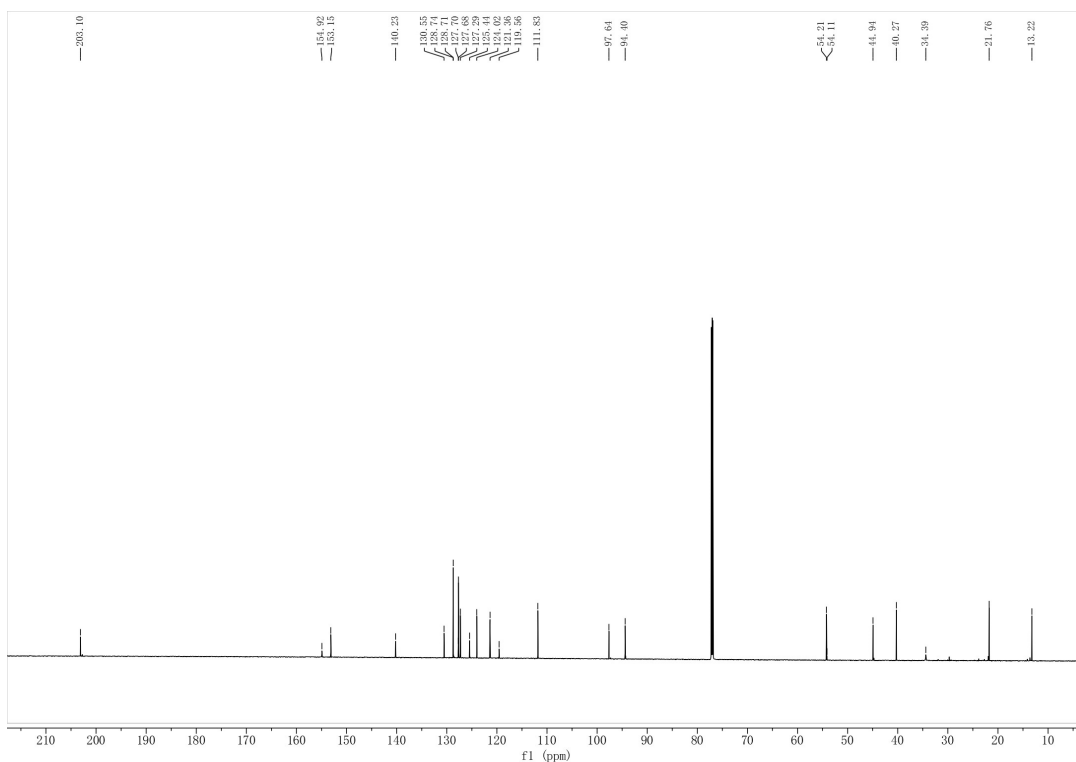

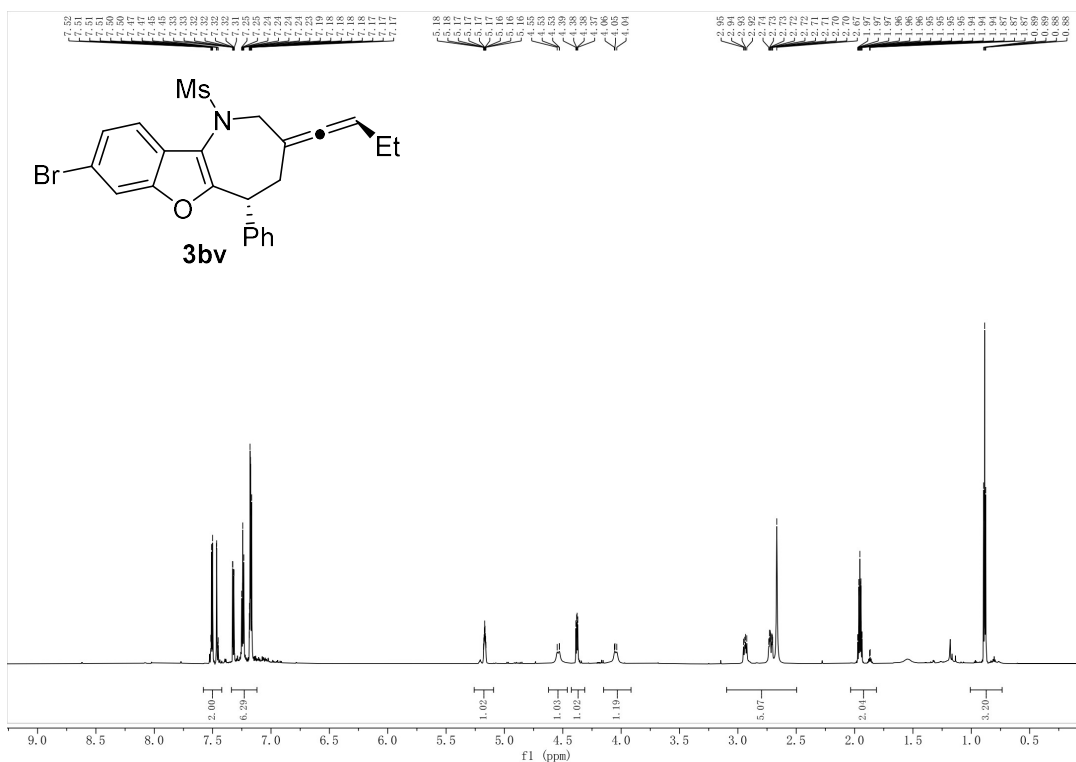

Figure S73. <sup>1</sup>H NMR spectrum of compound **3bv** in CDCl<sub>3</sub> at 800 MHz.

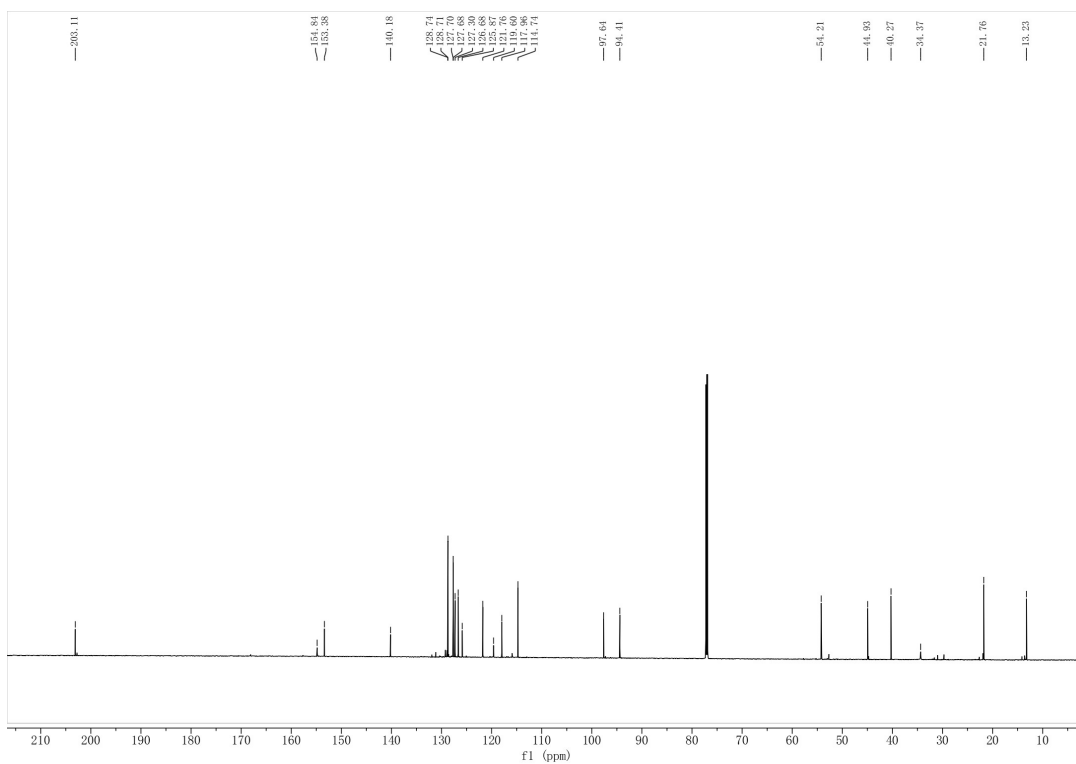

Figure S74. <sup>13</sup>C NMR spectrum of compound **3bv** in CDCl<sub>3</sub> at 201 MHz.

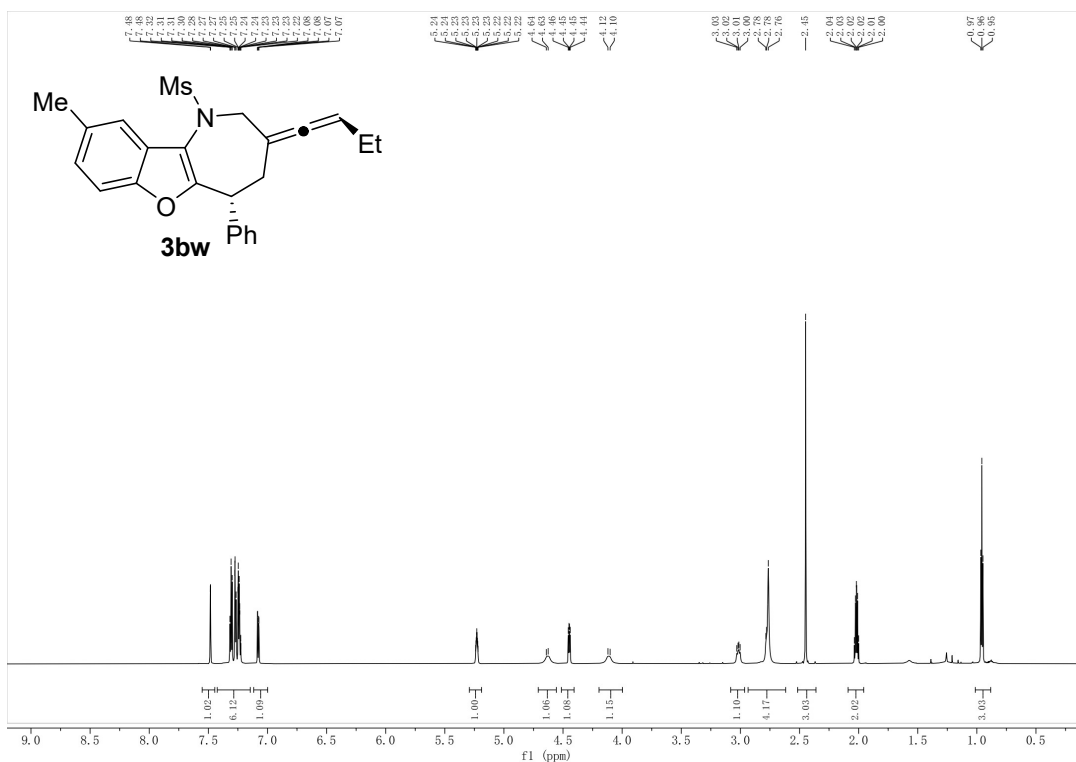

Figure S75.  $^1\text{H}$  NMR spectrum of compound **3bw** in CDCl<sub>3</sub> at 800 MHz.

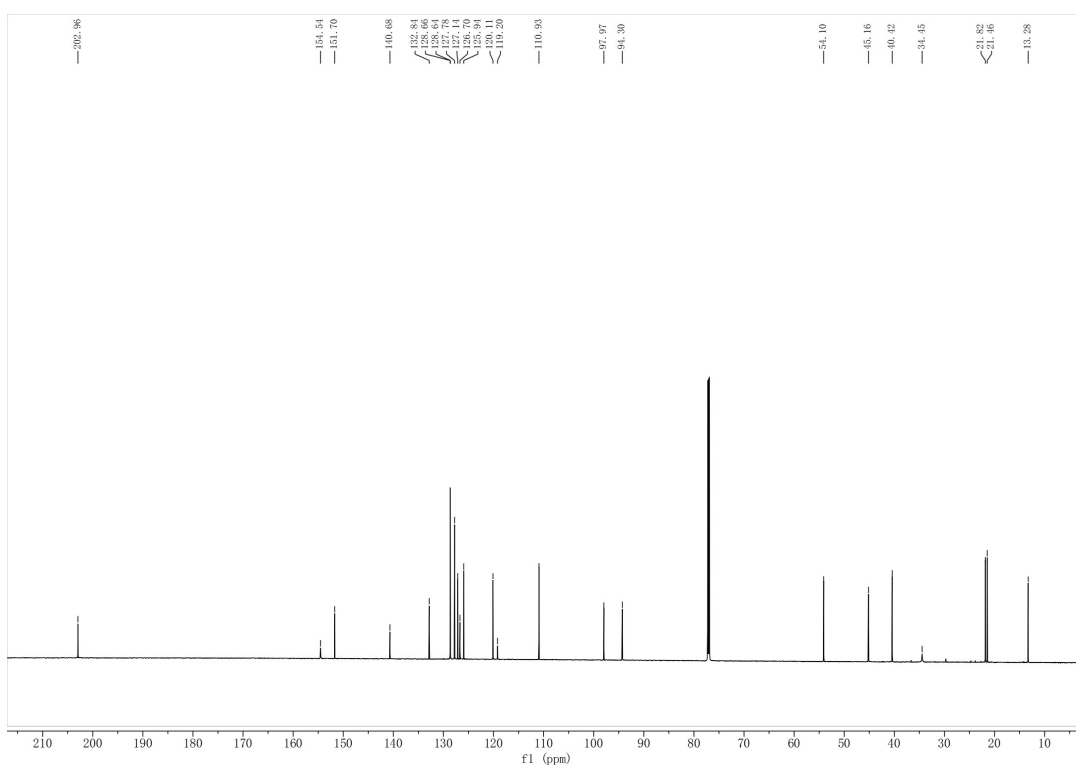

Figure S76.  $^{13}\text{C}$  NMR spectrum of compound **3bw** in CDCl<sub>3</sub> at 201 MHz.

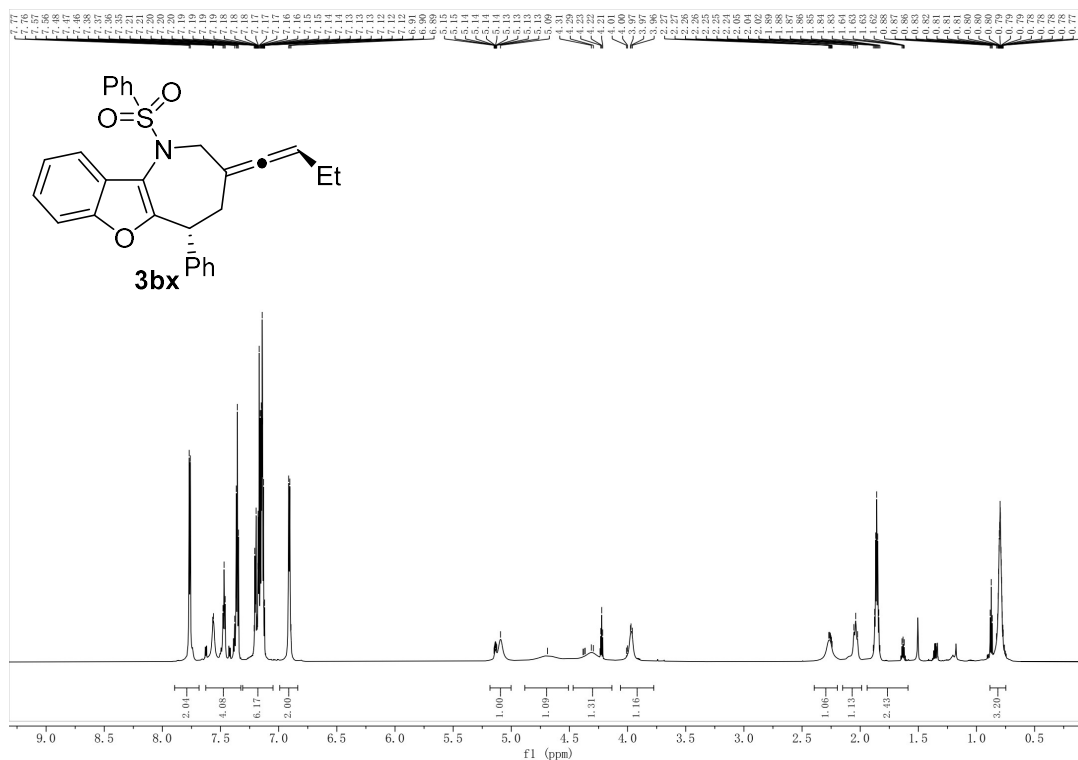

Figure S77. <sup>1</sup>H NMR spectrum of compound **3bx** in CDCl<sub>3</sub> at 800 MHz.

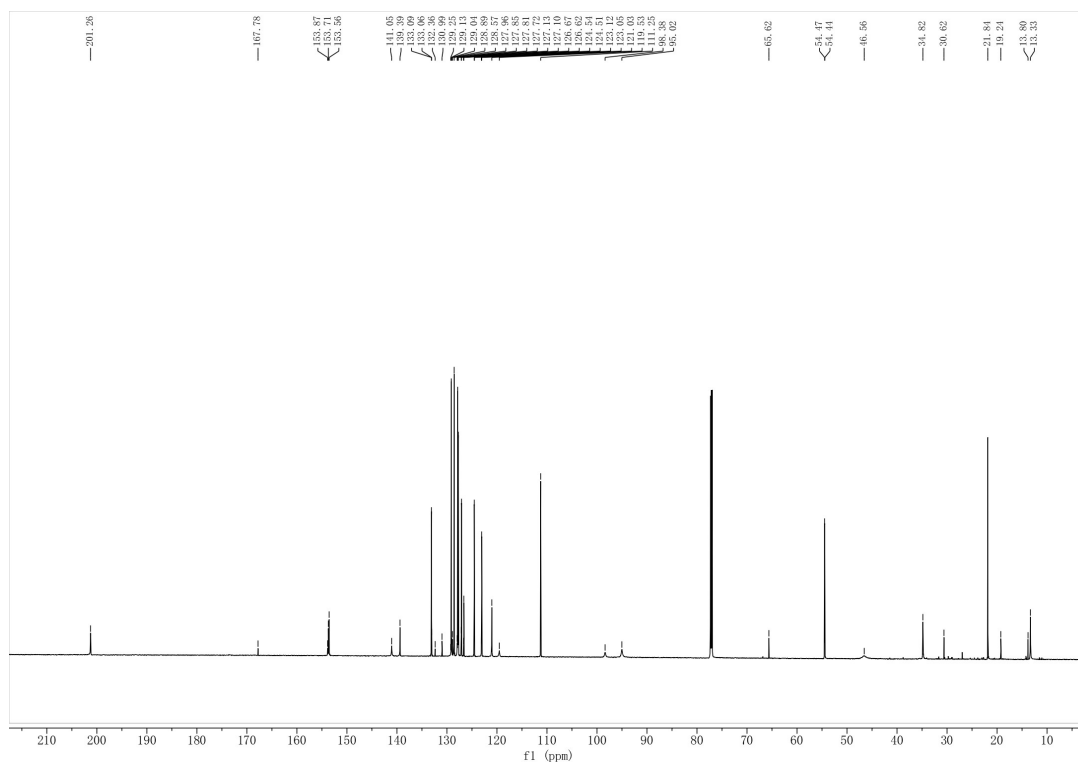

Figure S78. <sup>13</sup>C NMR spectrum of compound **3bx** in CDCl<sub>3</sub> at 201 MHz.

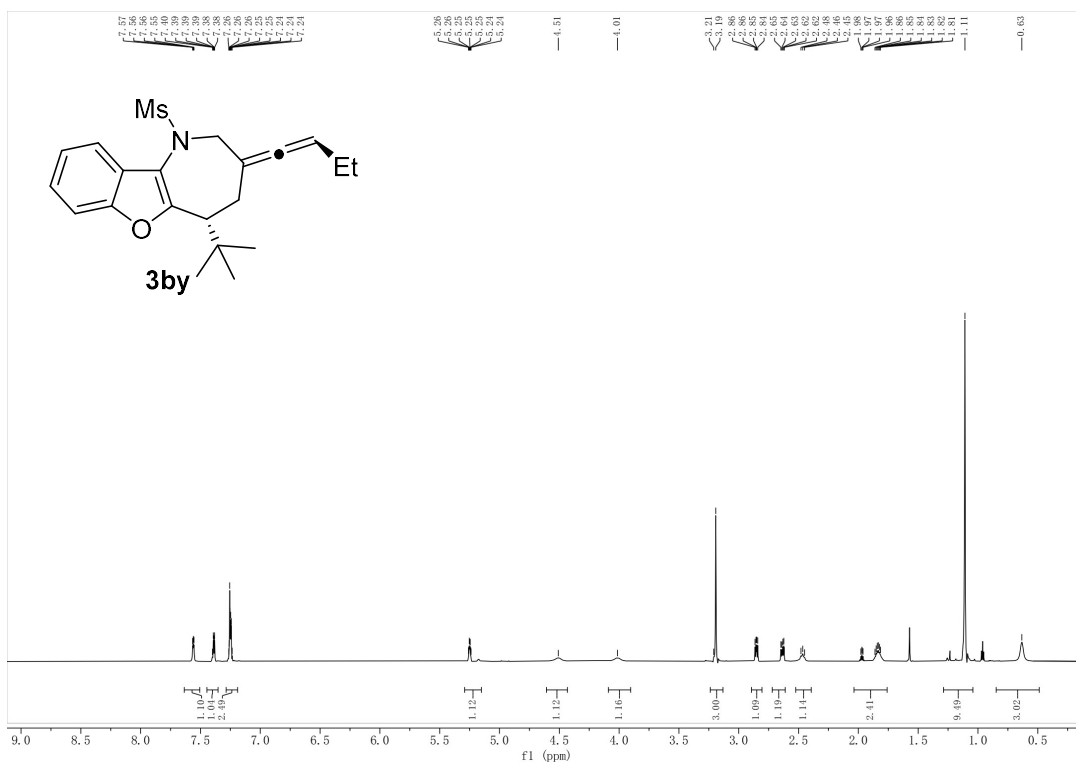

Figure S79. <sup>1</sup>H NMR spectrum of compound **3by** in CDCl<sub>3</sub> at 800 MHz.

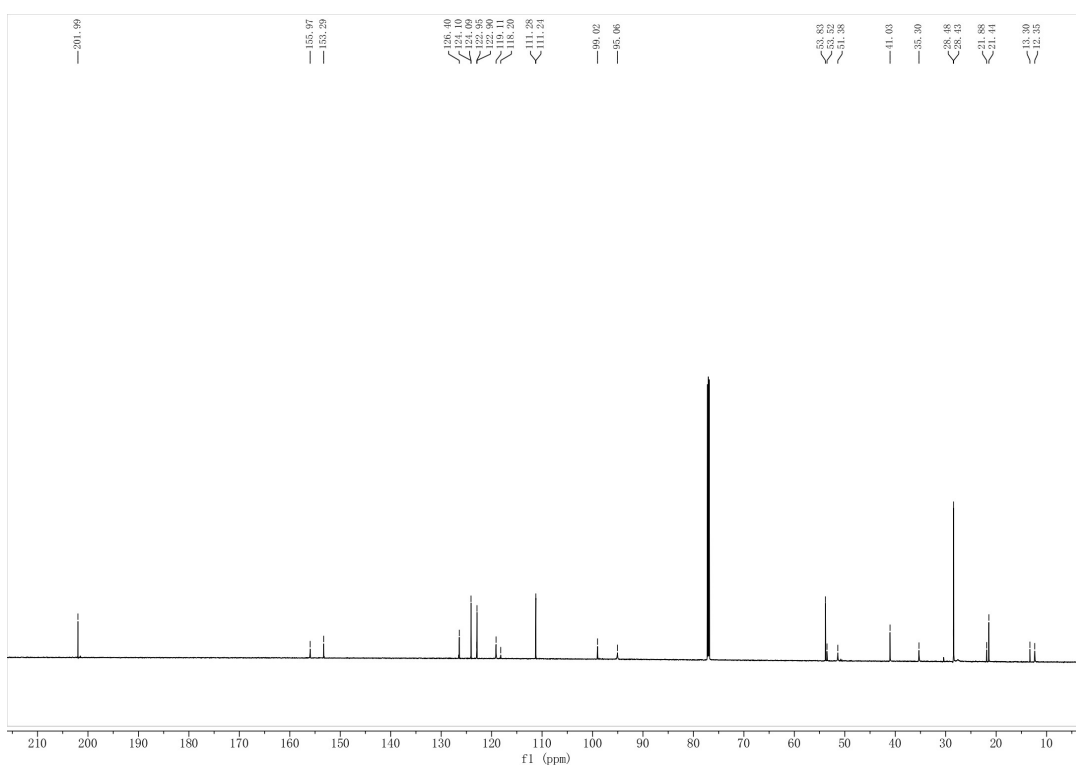

Figure S80. <sup>13</sup>C NMR spectrum of compound **3by** in CDCl<sub>3</sub> at 201 MHz.



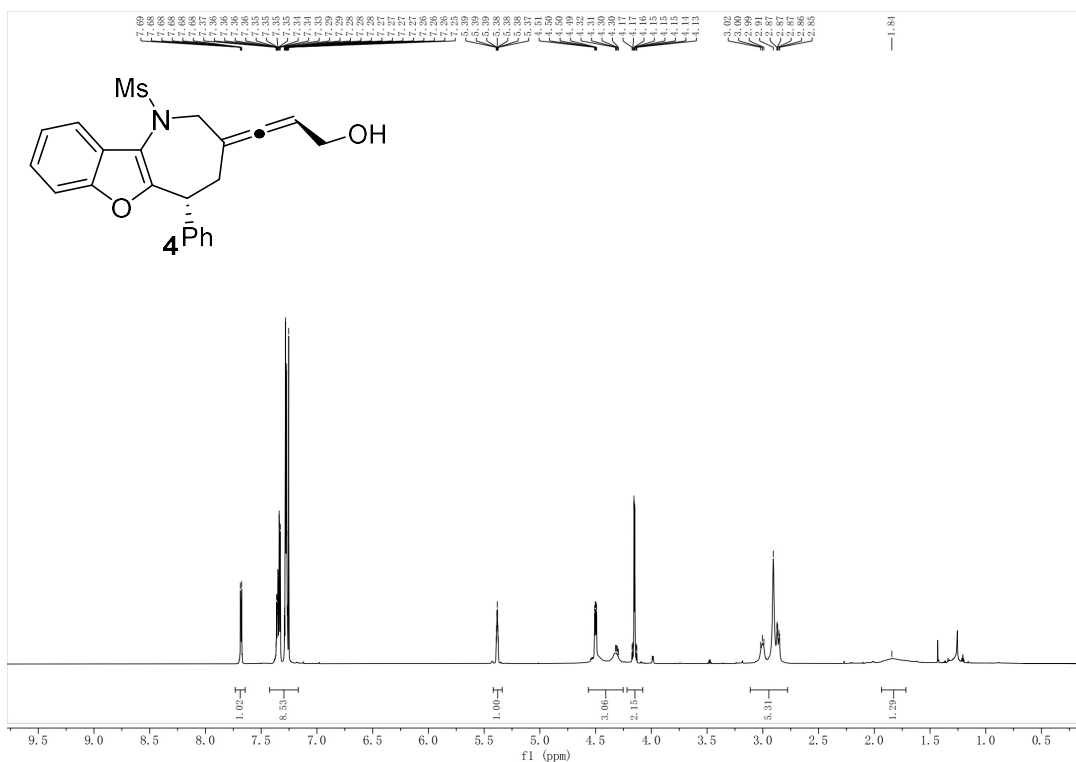

Figure S81. <sup>1</sup>H NMR spectrum of compound **4** in CDCl<sub>3</sub> at 800 MHz.

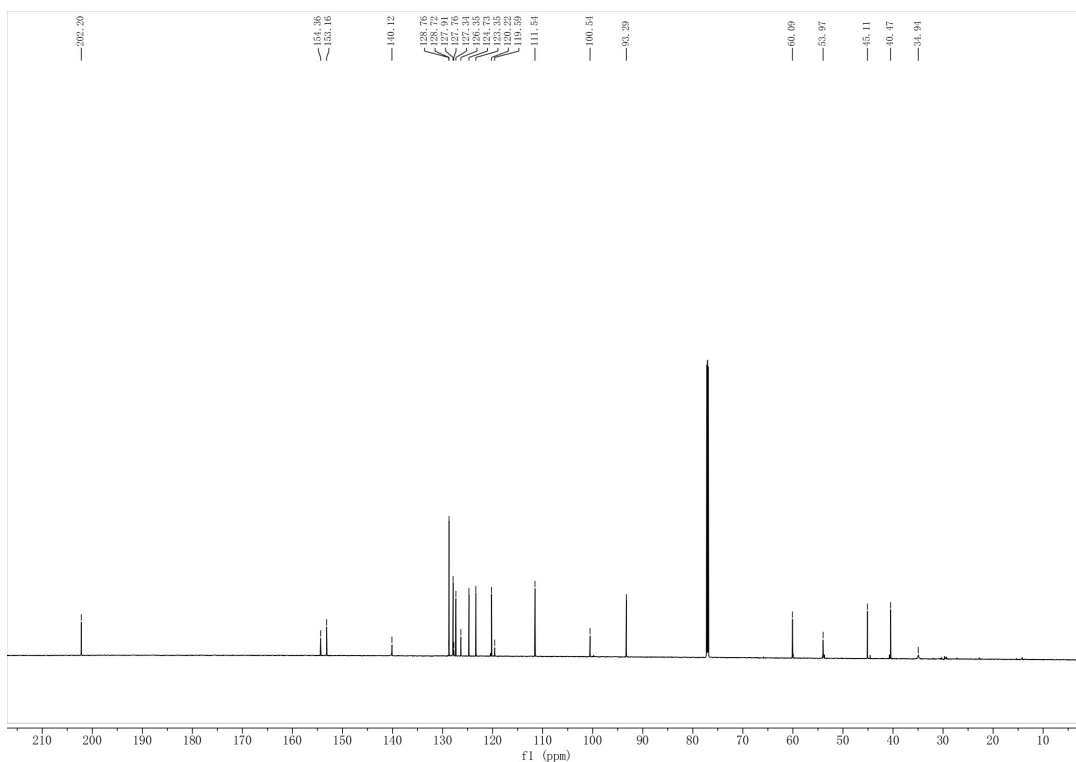

Figure S82. <sup>13</sup>C NMR spectrum of compound **4** in CDCl<sub>3</sub> at 201 MHz.

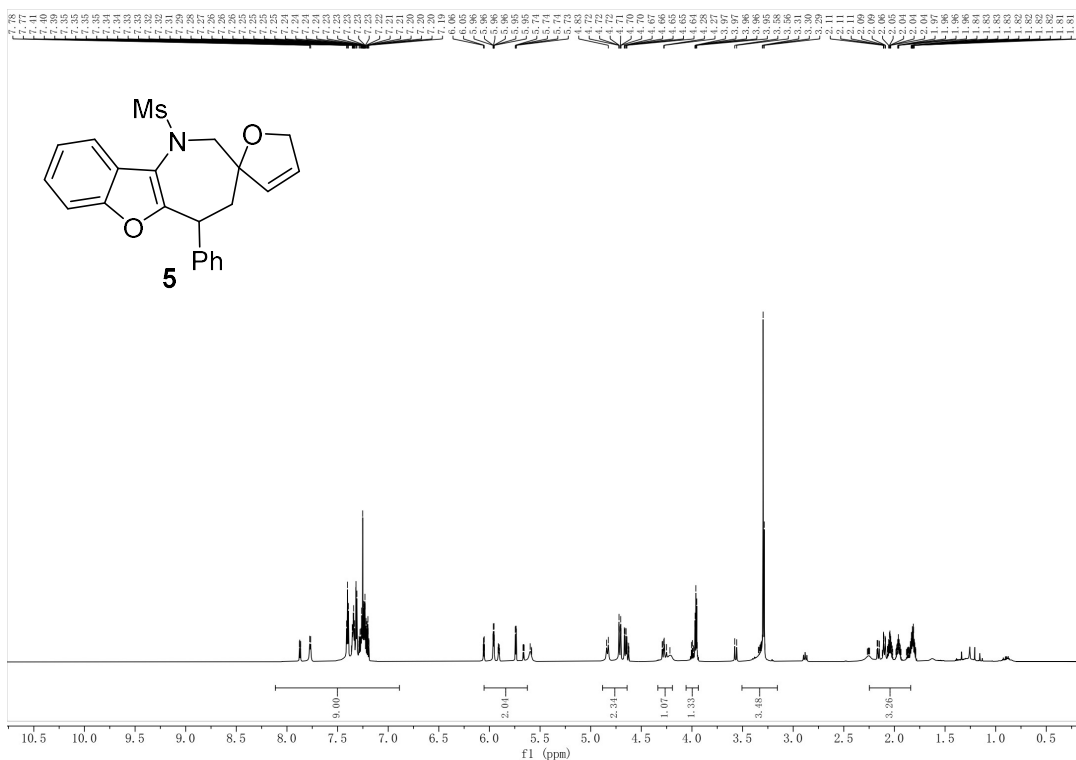

Figure S83. <sup>1</sup>H NMR spectrum of compound **5** in CDCl<sub>3</sub> at 800 MHz.

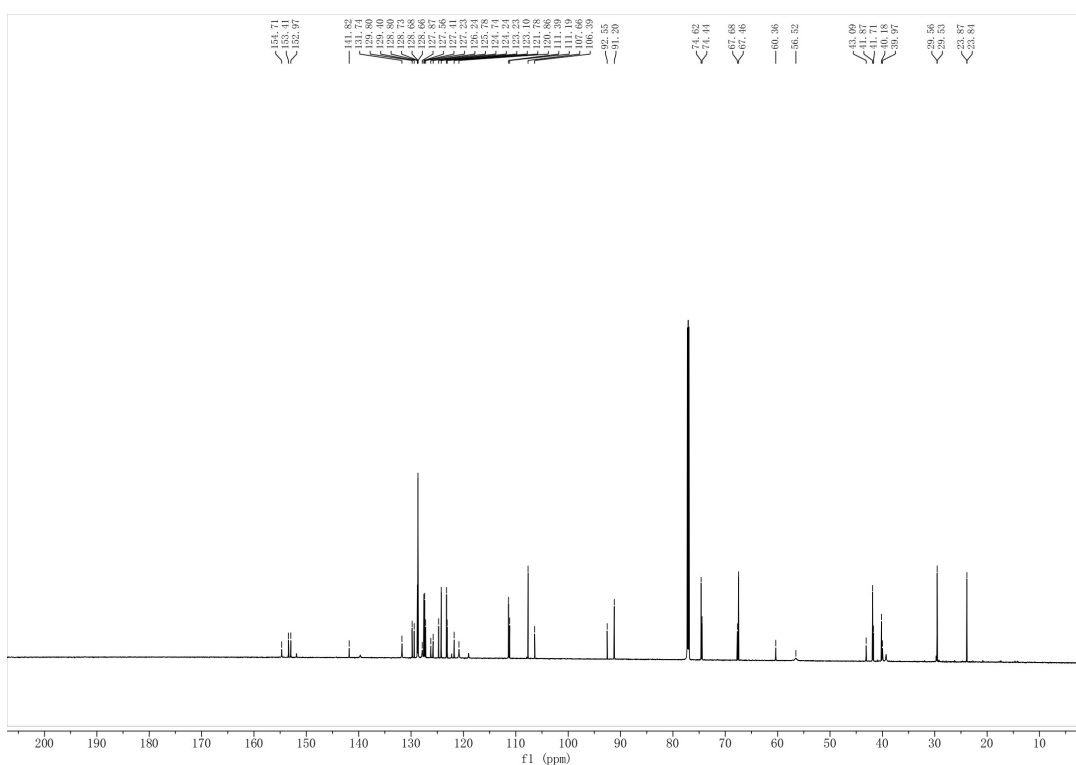

Figure S84. <sup>13</sup>C NMR spectrum of compound **5** in CDCl<sub>3</sub> at 201 MHz.

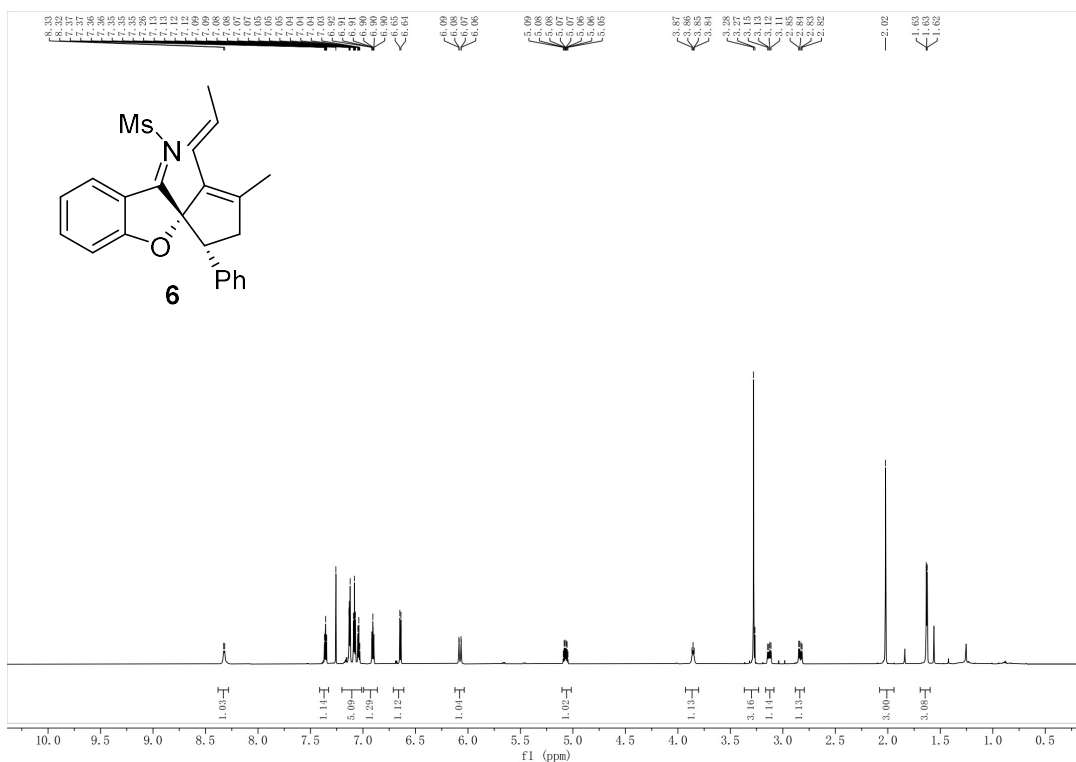

Figure S85. <sup>1</sup>H NMR spectrum of compound 6 in CDCl<sub>3</sub> at 800 MHz.

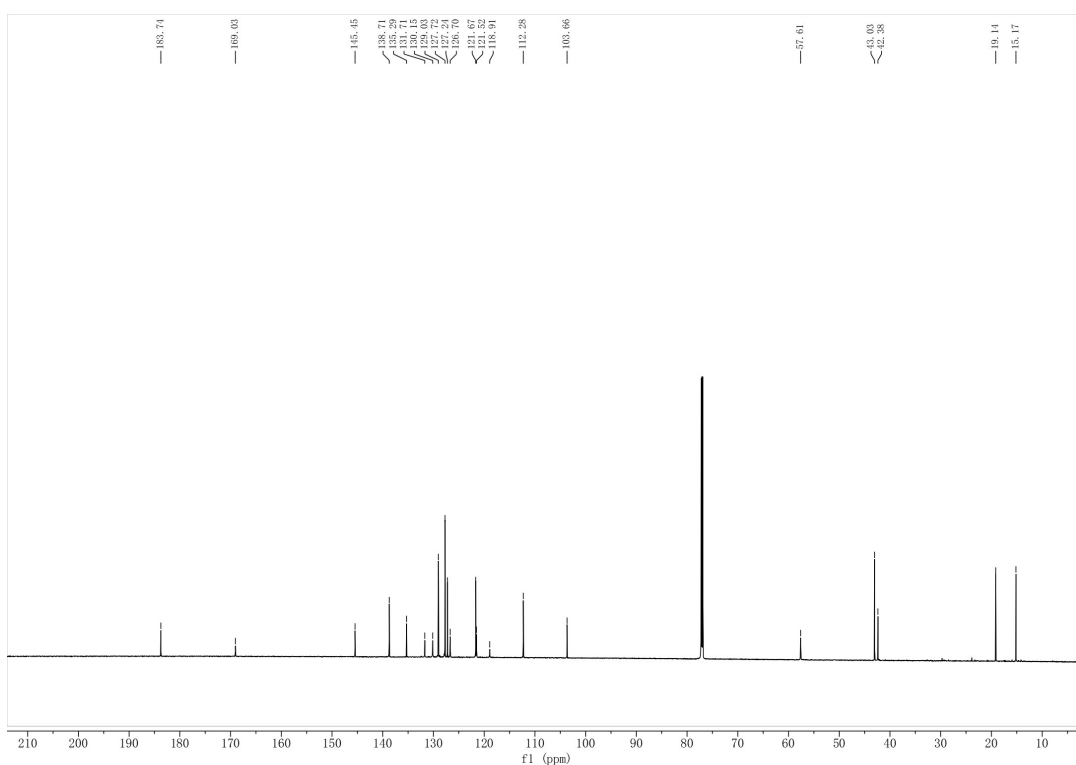

Figure S86. <sup>13</sup>C NMR spectrum of compound 6 in CDCl<sub>3</sub> at 201 MHz.

## HPLC Chromatograms of All Products

### HPLC chromatogram of racemic 3aa

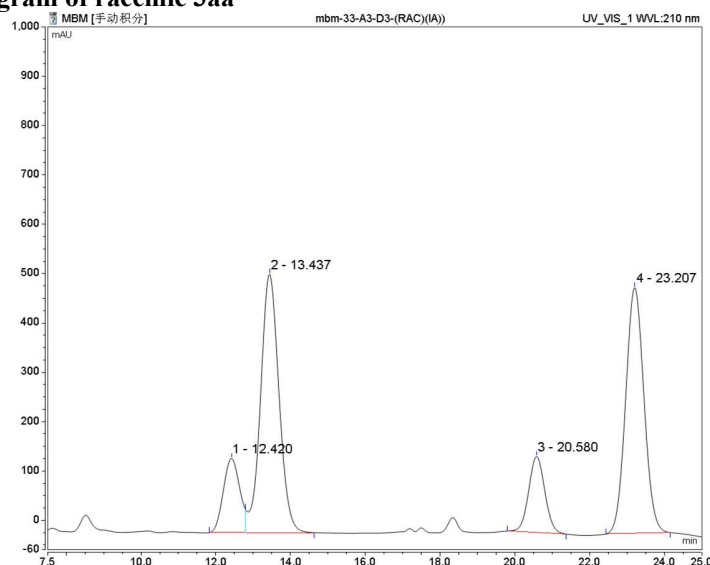

| No.    | Retention Time<br>min | Area<br>mAU*min | Relative Area<br>% |
|--------|-----------------------|-----------------|--------------------|
| 1      | 12.42                 | 75.319          | 10.26              |
| 2      | 13.437                | 299.394         | 40.77              |
| 3      | 20.58                 | 77.221          | 10.52              |
| 4      | 23.207                | 282.383         | 38.46              |
| Total: |                       | 734.317         | 100                |

### HPLC chromatogram of chiral 3aa

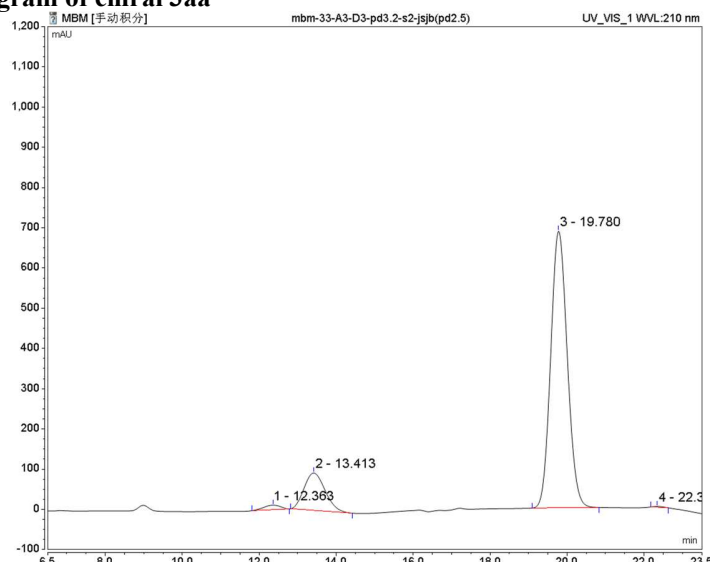

| No.    | Retention Time<br>min | Area<br>mAU*min | Relative Area<br>% |
|--------|-----------------------|-----------------|--------------------|
| 1      | 12.363                | 5.717           | 1.4                |
| 2      | 13.413                | 58.978          | 14.46              |
| 3      | 19.78                 | 342.556         | 83.99              |
| 4      | 22.347                | 0.608           | 0.15               |
| Total: |                       | 407.858         | 100                |

### HPLC chromatogram of racemic 3ba

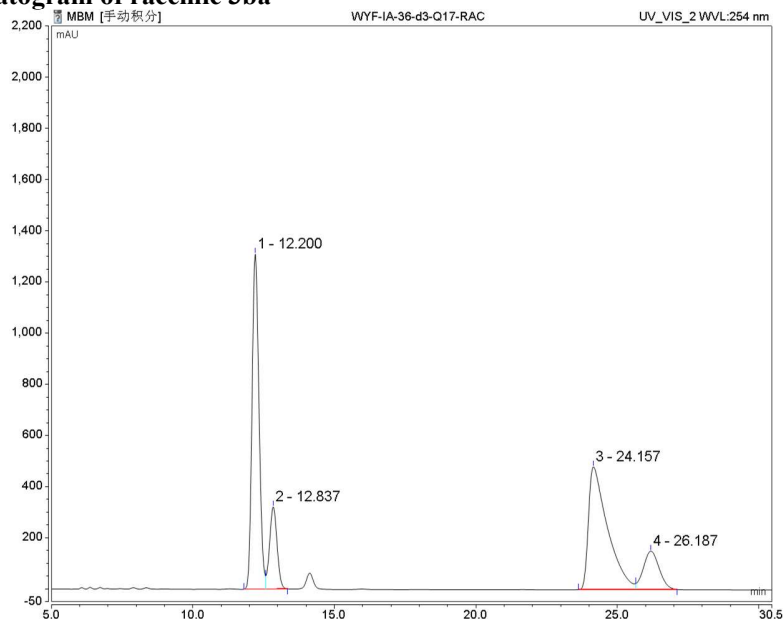

| No.    | Retention Time<br>min | Area<br>mAU*min | Relative Area<br>% |
|--------|-----------------------|-----------------|--------------------|
| 1      | 12.2                  | 372.79          | 39.54              |
| 2      | 12.837                | 98.302          | 10.43              |
| 3      | 24.157                | 374.348         | 39.71              |
| 4      | 26.187                | 97.266          | 10.32              |
| Total: |                       | 942.707         | 100                |

### HPLC chromatogram of chiral 3ba

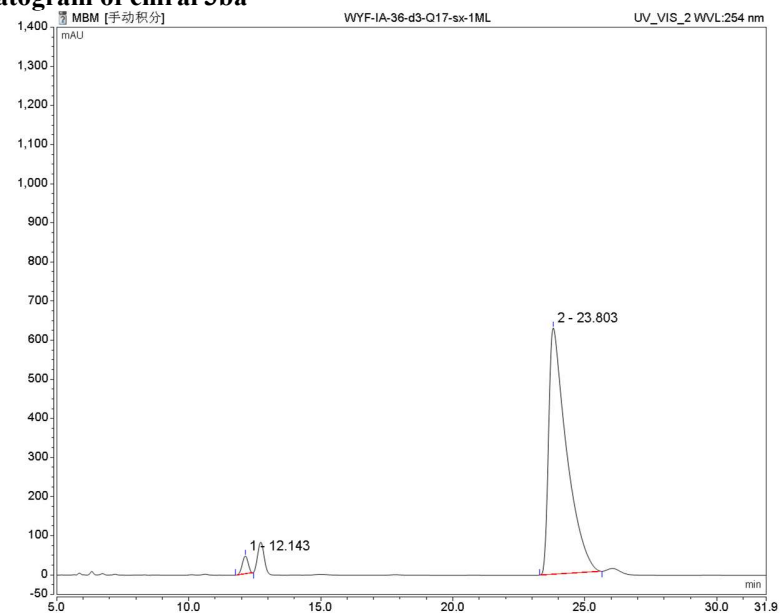

| No.    | Retention Time<br>min | Area<br>mAU*min | Relative Area<br>% |
|--------|-----------------------|-----------------|--------------------|
| 1      | 12.143                | 11.663          | 2.3                |
| 2      | 23.803                | 495.681         | 97.7               |
| Total: |                       | 507.345         | 100                |

### HPLC chromatogram of racemic 3ca

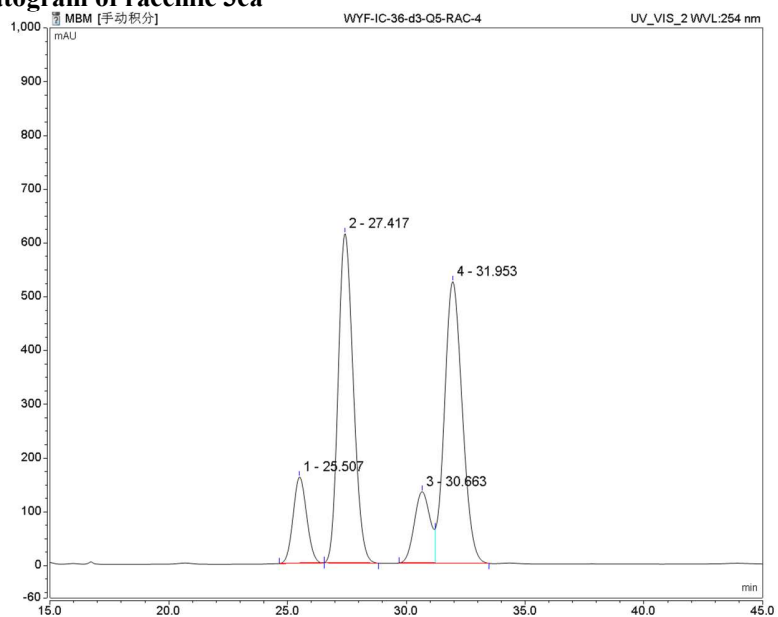

| No.    | Retention Time<br>min | Area<br>mAU*min | Relative Area<br>% |
|--------|-----------------------|-----------------|--------------------|
| 1      | 25.507                | 105.218         | 9.42               |
| 2      | 27.417                | 451.669         | 40.45              |
| 3      | 30.663                | 103.055         | 9.23               |
| 4      | 31.953                | 456.572         | 40.89              |
| Total: |                       | 1116.515        | 100                |

### HPLC chromatogram of chiral 3ca

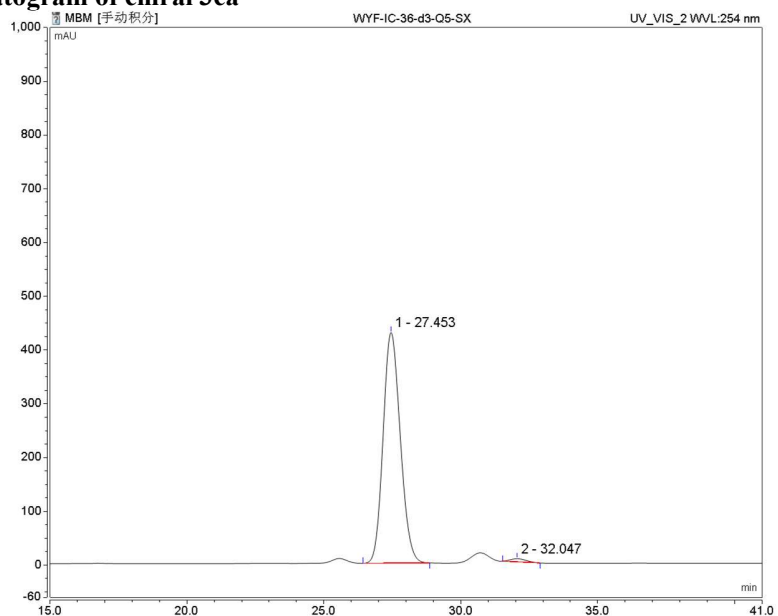

| No.    | Retention Time<br>min | Area<br>mAU*min | Relative Area<br>% |
|--------|-----------------------|-----------------|--------------------|
| 1      | 27.453                | 311.58          | 98.76              |
| 2      | 32.047                | 3.919           | 1.24               |
| Total: |                       | 315.499         | 100                |

### HPLC chromatogram of racemic 3da

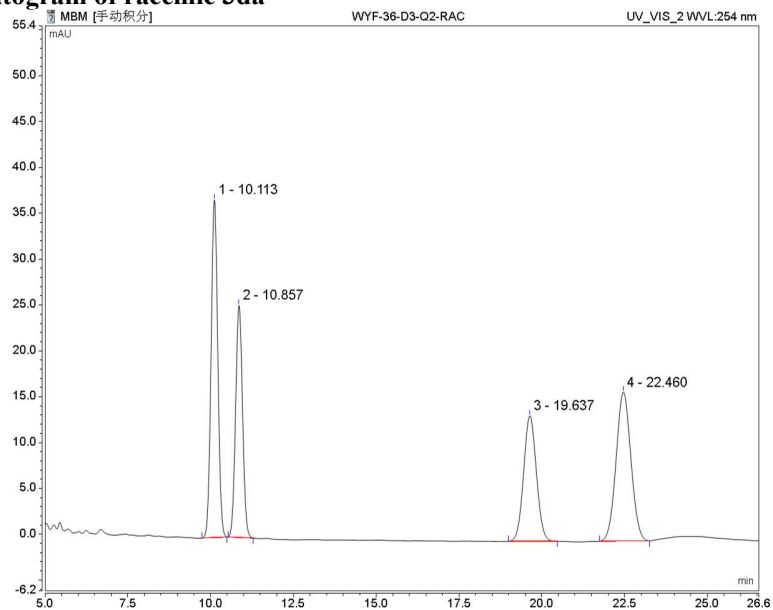

| No.    | Retention Time<br>min | Area<br>mAU*min | Relative Area<br>% |
|--------|-----------------------|-----------------|--------------------|
| 1      | 10.113                | 8.584           | 29.36              |
| 2      | 10.857                | 6.131           | 20.97              |
| 3      | 19.637                | 6.109           | 20.9               |
| 4      | 22.46                 | 8.41            | 28.77              |
| Total: |                       | 29.235          | 100.00             |

### HPLC chromatogram of chiral 3da

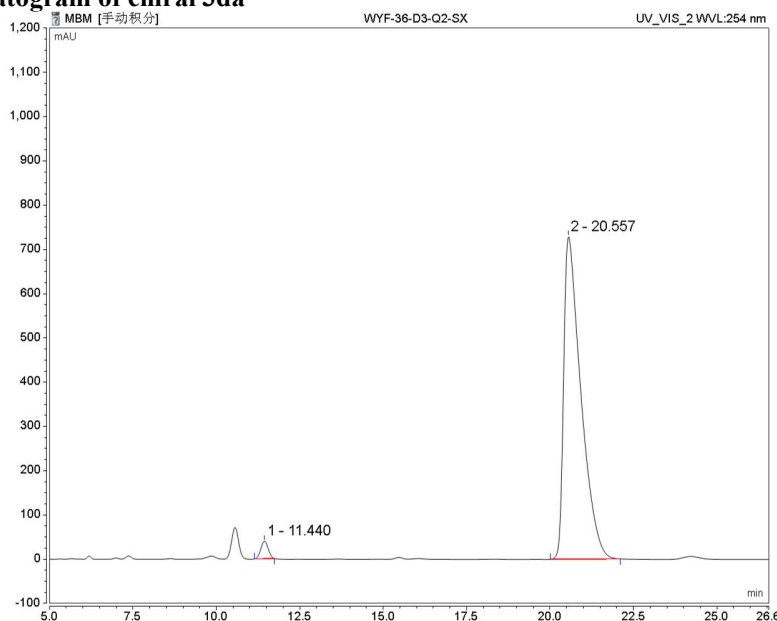

| No.    | Retention Time<br>min | Area<br>mAU*min | Relative Area<br>% |
|--------|-----------------------|-----------------|--------------------|
| 1      | 11.44                 | 10.107          | 2.27               |
| 2      | 20.557                | 434.756         | 97.73              |
| Total: |                       | 444.863         | 100                |

### HPLC chromatogram of racemic 3ea

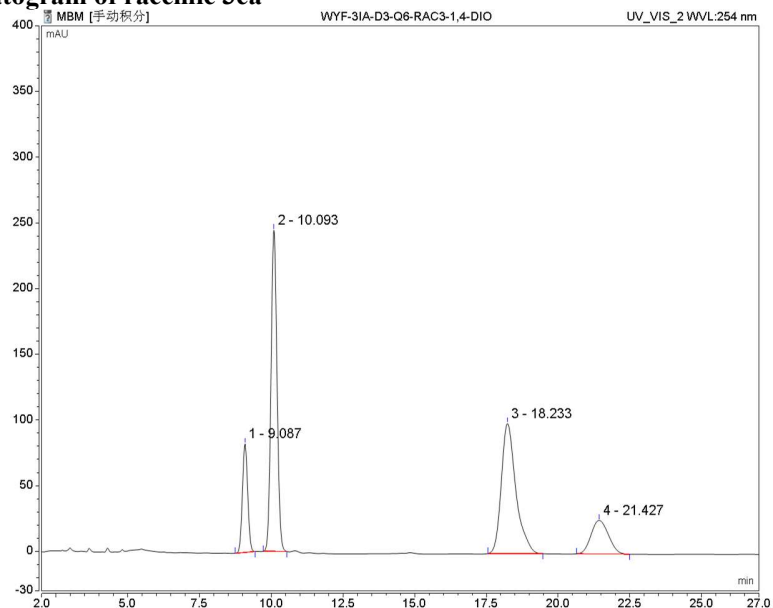

| No.    | Retention Time<br>min | Area<br>mAU*min | Relative Area<br>% |
|--------|-----------------------|-----------------|--------------------|
| 1      | 9.087                 | 17.701          | 11.57              |
| 2      | 10.093                | 59.042          | 38.6               |
| 3      | 18.233                | 58.292          | 38.11              |
| 4      | 21.427                | 17.932          | 11.72              |
| Total: |                       | 152.968         | 100                |

### HPLC chromatogram of chiral 3ea

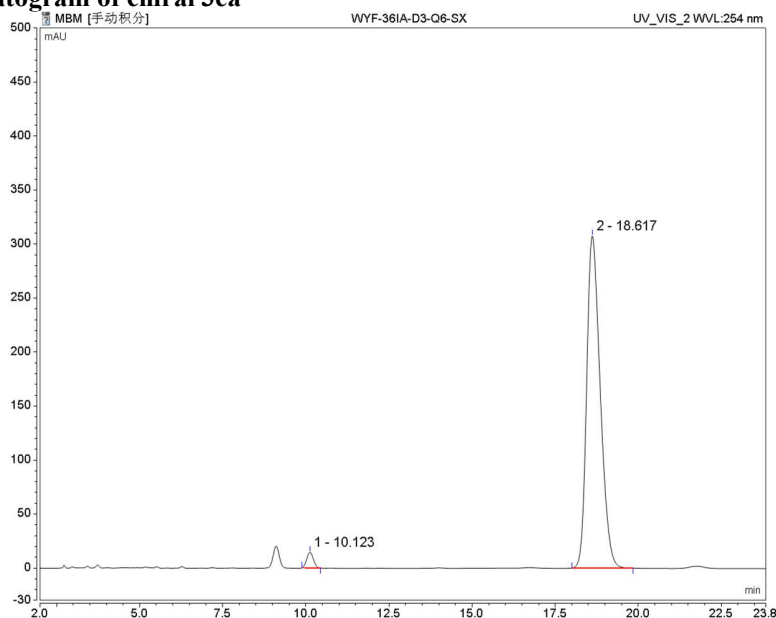

| No.    | Retention Time<br>min | Area<br>mAU*min | Relative Area<br>% |
|--------|-----------------------|-----------------|--------------------|
| 1      | 10.123                | 3.404           | 2.29               |
| 2      | 18.617                | 145.287         | 97.71              |
| Total: |                       | 148.69          | 100                |



### HPLC chromatogram of racemic 3fa

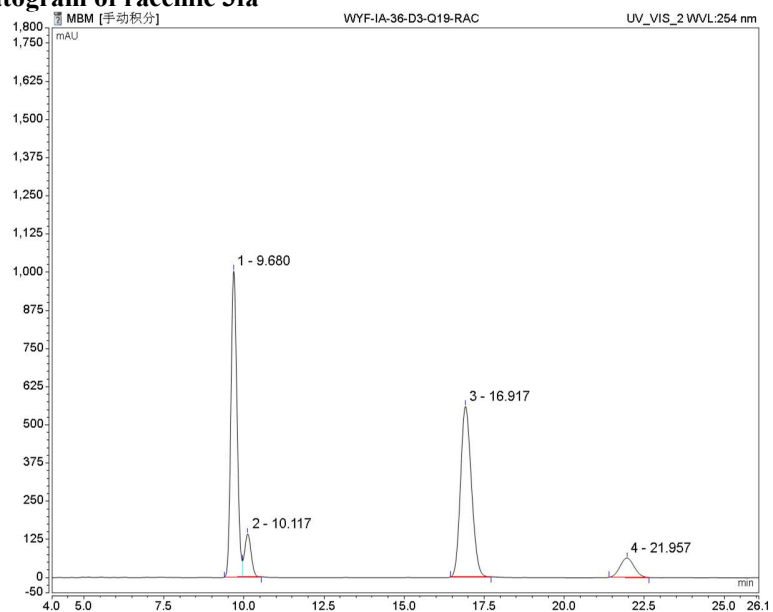

| No.    | Retention Time<br>min | Area<br>mAU*min | Relative Area<br>% |
|--------|-----------------------|-----------------|--------------------|
| 1      | 9.68                  | 221.348         | 43.65              |
| 2      | 10.117                | 33.168          | 6.54               |
| 3      | 16.917                | 220.385         | 43.46              |
| 4      | 21.957                | 32.242          | 6.36               |
| Total: |                       | 507.142         | 100                |

### HPLC chromatogram of chiral 3fa

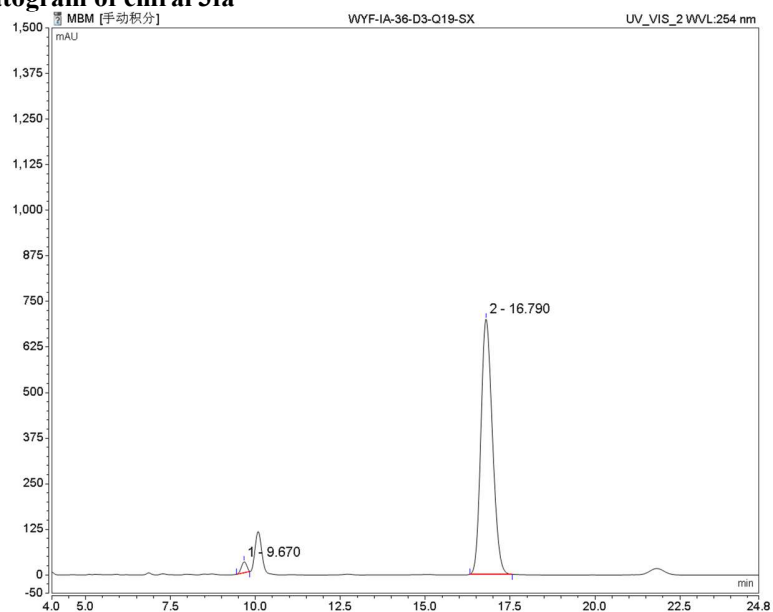

| No.    | Retention Time<br>min | Area<br>mAU*min | Relative Area<br>% |
|--------|-----------------------|-----------------|--------------------|
| 1      | 9.67                  | 5.55            | 1.98               |
| 2      | 16.79                 | 275.159         | 98.02              |
| Total: |                       | 280.709         | 100                |

### HPLC chromatogram of racemic 3ga

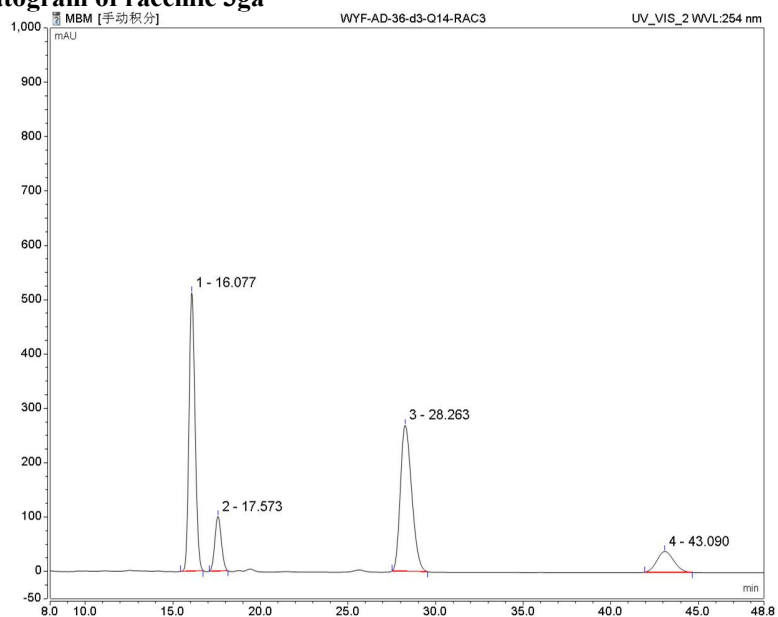

| No.    | Retention Time<br>min | Area<br>mAU*min | Relative Area<br>% |
|--------|-----------------------|-----------------|--------------------|
| 1      | 16.077                | 204.098         | 41.55              |
| 2      | 17.573                | 43.045          | 8.76               |
| 3      | 28.263                | 201.216         | 40.97              |
| 4      | 43.09                 | 42.82           | 8.72               |
| Total: |                       | 491.179         | 100                |

### HPLC chromatogram of chiral 3ga

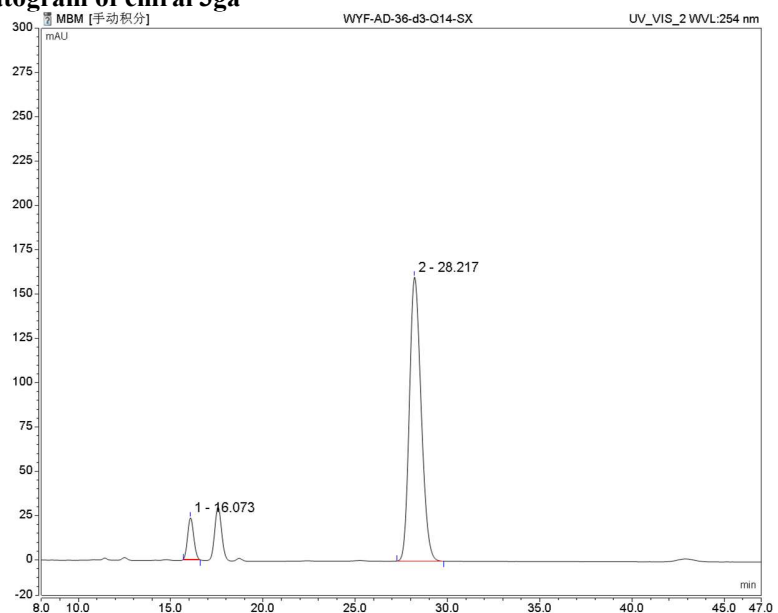

| No.    | Retention Time<br>min | Area<br>mAU*min | Relative Area<br>% |
|--------|-----------------------|-----------------|--------------------|
| 1      | 16.073                | 9.069           | 7.13               |
| 2      | 28.217                | 118.135         | 92.87              |
| Total: |                       | 127.204         | 100                |

### HPLC chromatogram of racemic 3ha

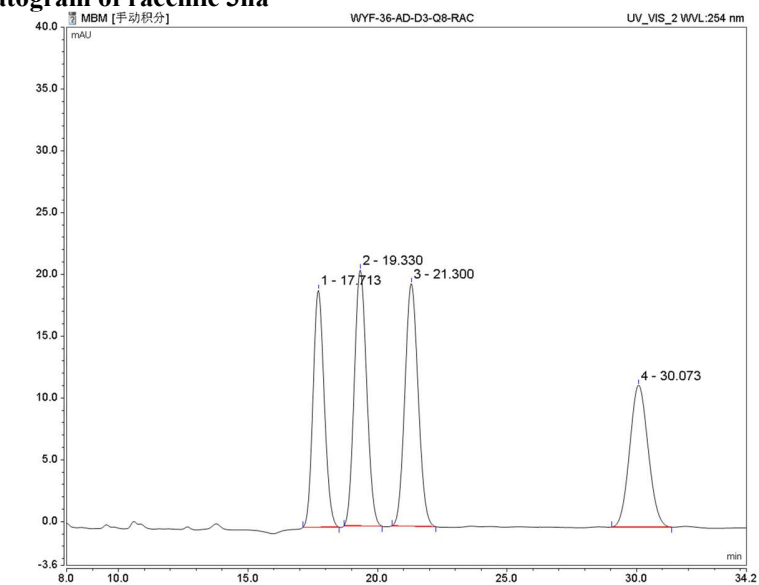

| No.    | Retention Time<br>min | Area<br>mAU*min | Relative Area<br>% |
|--------|-----------------------|-----------------|--------------------|
| 1      | 17.713                | 9.597           | 22.75              |
| 2      | 19.33                 | 11.449          | 27.14              |
| 3      | 21.3                  | 11.657          | 27.63              |
| 4      | 30.073                | 9.48            | 22.47              |
| Total: |                       | 42.183          | 100                |

### HPLC chromatogram of chiral 3ha

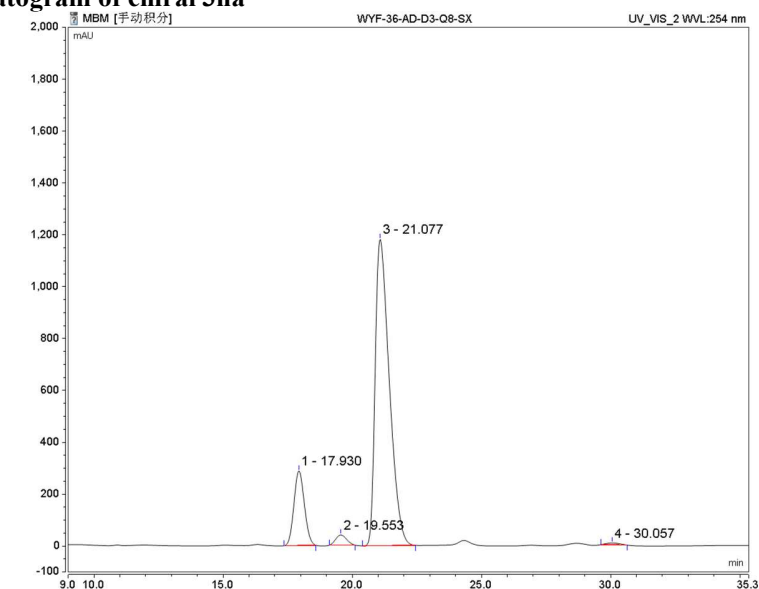

| No.    | Retention Time<br>min | Area<br>mAU*min | Relative Area<br>% |
|--------|-----------------------|-----------------|--------------------|
| 1      | 17.93                 | 134.428         | 14.86              |
| 2      | 19.553                | 19.228          | 2.13               |
| 3      | 21.077                | 746.401         | 82.53              |
| 4      | 30.057                | 4.312           | 0.48               |
| Total: |                       | 904.369         | 100                |

### HPLC chromatogram of racemic 3ia

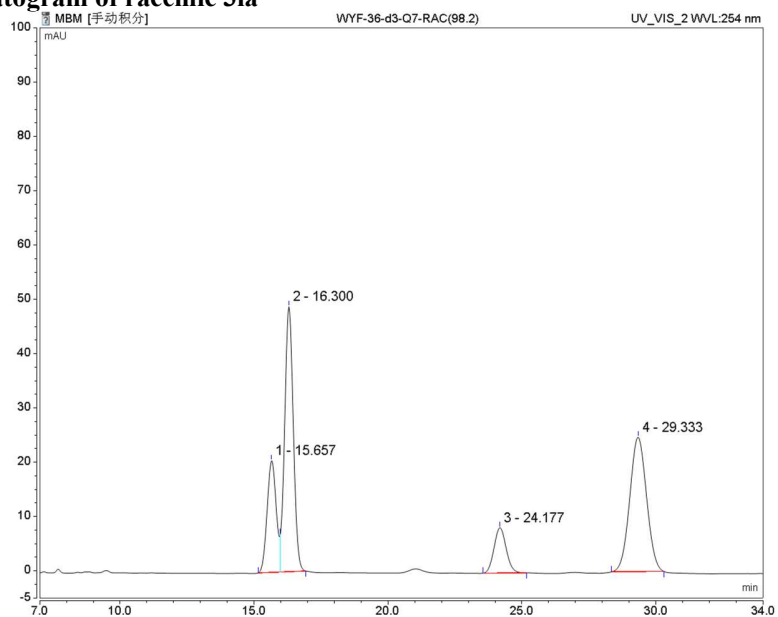

| No.    | Retention Time<br>min | Area<br>mAU*min | Relative Area<br>% |
|--------|-----------------------|-----------------|--------------------|
| 1      | 15.657                | 8.217           | 16.84              |
| 2      | 16.3                  | 18.176          | 37.25              |
| 3      | 24.177                | 4.398           | 9.01               |
| 4      | 29.333                | 17.998          | 36.89              |
| Total: |                       | 48.79           | 100                |

### HPLC chromatogram of chiral 3ia

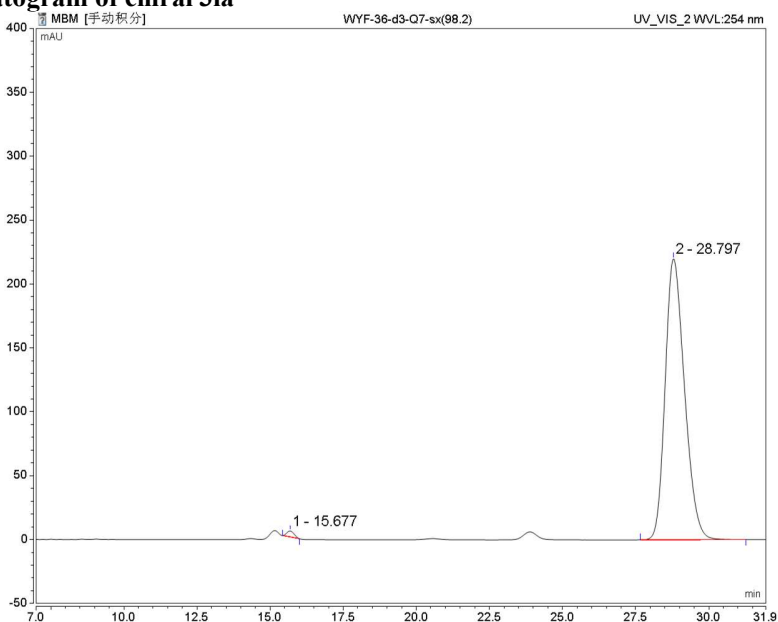

| No.    | Retention Time<br>min | Area<br>mAU*min | Relative Area<br>% |
|--------|-----------------------|-----------------|--------------------|
| 1      | 15.677                | 1.352           | 0.8                |
| 2      | 28.797                | 168.695         | 99.2               |
| Total: |                       | 170.047         | 100                |

### HPLC chromatogram of racemic 3ja

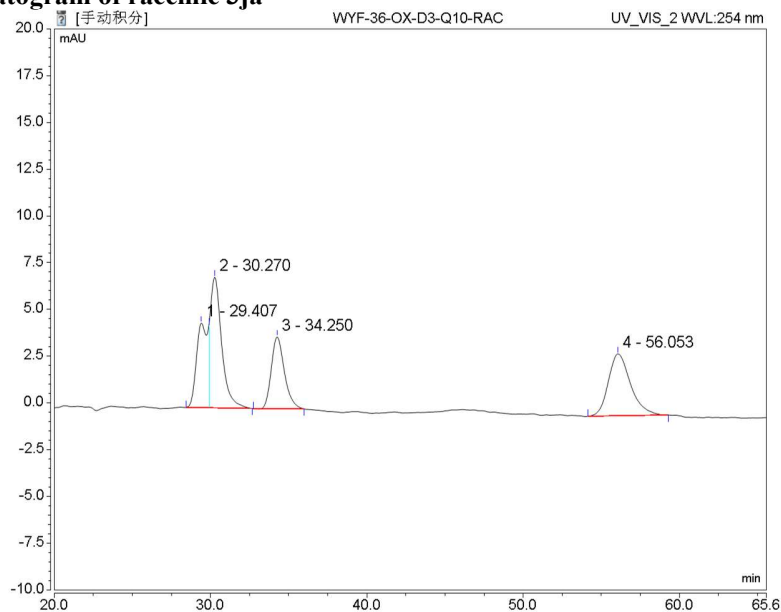

| No.    | Retention Time<br>min | Area<br>mAU*min | Relative Area<br>% |
|--------|-----------------------|-----------------|--------------------|
| 1      | 29.407                | 3.689           | 19.62              |
| 2      | 30.27                 | 5.91            | 31.44              |
| 3      | 34.25                 | 3.74            | 19.89              |
| 4      | 56.053                | 5.459           | 29.04              |
| Total: |                       | 18.798          | 100                |

### HPLC chromatogram of chiral 3ja

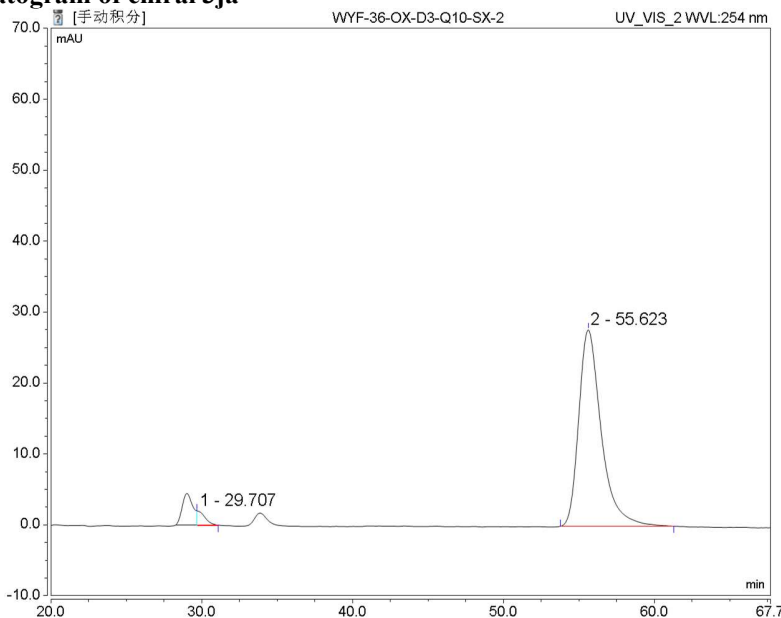

| No.    | Retention Time<br>min | Area<br>mAU*min | Relative Area<br>% |
|--------|-----------------------|-----------------|--------------------|
| 1      | 29.707                | 1.165           | 2.37               |
| 2      | 55.623                | 47.927          | 97.63              |
| Total: |                       | 49.092          | 100                |

### HPLC chromatogram of racemic 3bb

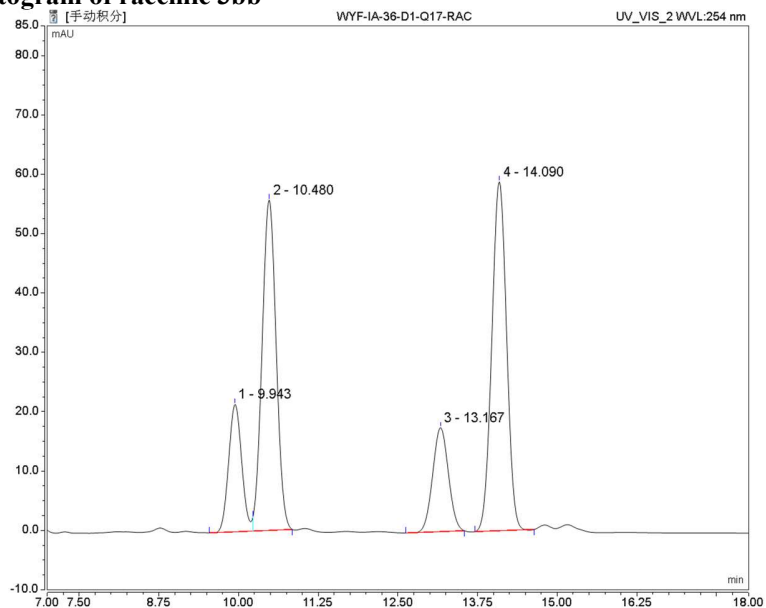

| No.    | Retention Time<br>min | Area<br>mAU*min | Relative Area<br>% |
|--------|-----------------------|-----------------|--------------------|
| 1      | 9.943                 | 5.115           | 12.75              |
| 2      | 10.48                 | 14.211          | 35.43              |
| 3      | 13.167                | 5.015           | 12.5               |
| 4      | 14.09                 | 15.767          | 39.31              |
| Total: |                       | 40.107          | 100                |

### HPLC chromatogram of chiral 3bb

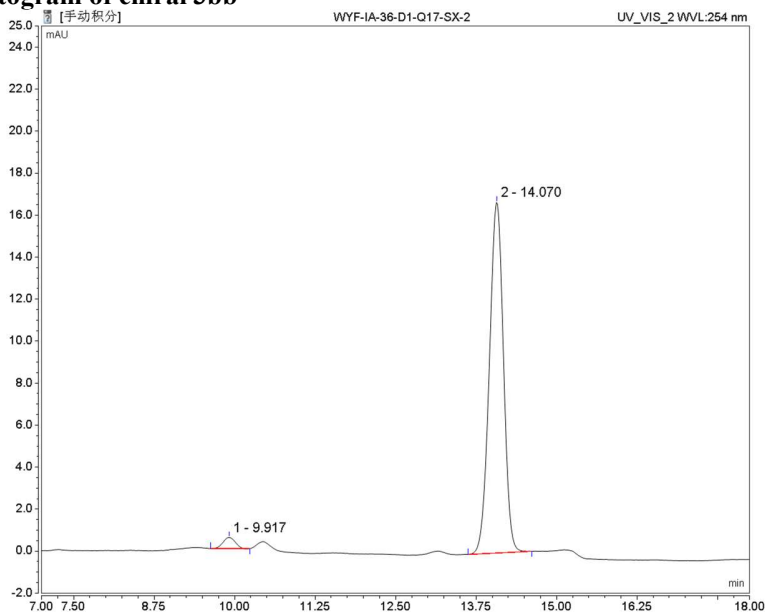

| No.    | Retention Time<br>min | Area<br>mAU*min | Relative Area<br>% |
|--------|-----------------------|-----------------|--------------------|
| 1      | 9.917                 | 0.115           | 2.66               |
| 2      | 14.07                 | 4.23            | 97.34              |
| Total: |                       | 4.345           | 100                |

### HPLC chromatogram of racemic 3bc

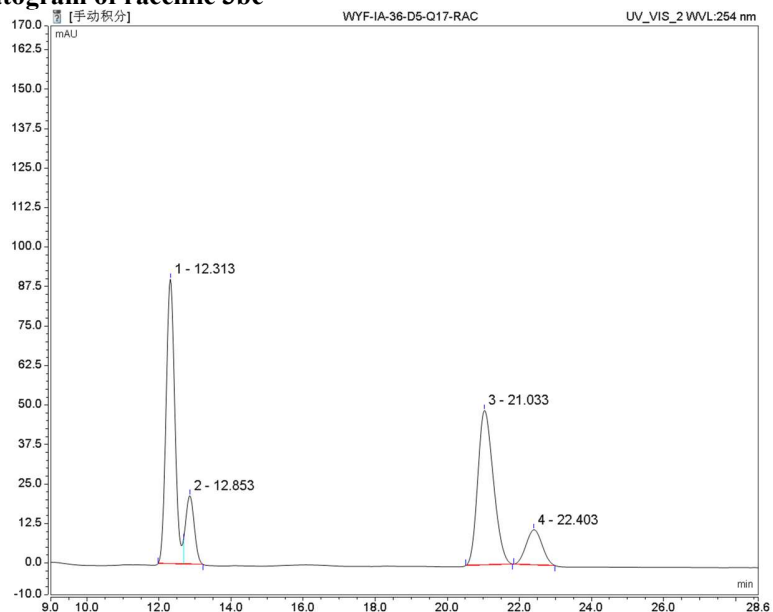

| No.    | Retention Time<br>min | Area<br>mAU*min | Relative Area<br>% |
|--------|-----------------------|-----------------|--------------------|
| 1      | 12.313                | 25.278          | 41.17              |
| 2      | 12.853                | 5.935           | 9.67               |
| 3      | 21.033                | 24.486          | 39.88              |
| 4      | 22.403                | 5.699           | 9.28               |
| Total: |                       | 61.398          | 100                |

### HPLC chromatogram of chiral 3bc

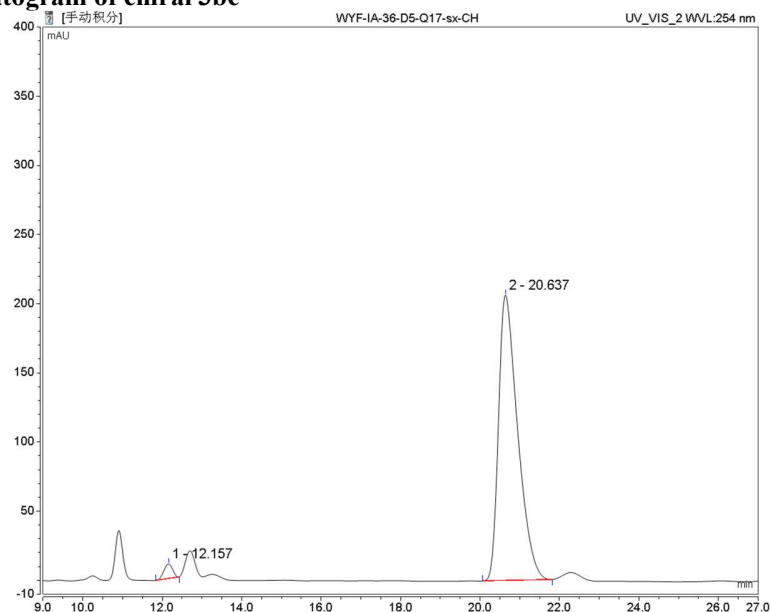

| No.    | Retention Time<br>min | Area<br>mAU*min | Relative Area<br>% |
|--------|-----------------------|-----------------|--------------------|
| 1      | 12.157                | 2.662           | 2.27               |
| 2      | 20.637                | 114.528         | 97.73              |
| Total: |                       | 61.398          | 100                |

### HPLC chromatogram of racemic 3bd

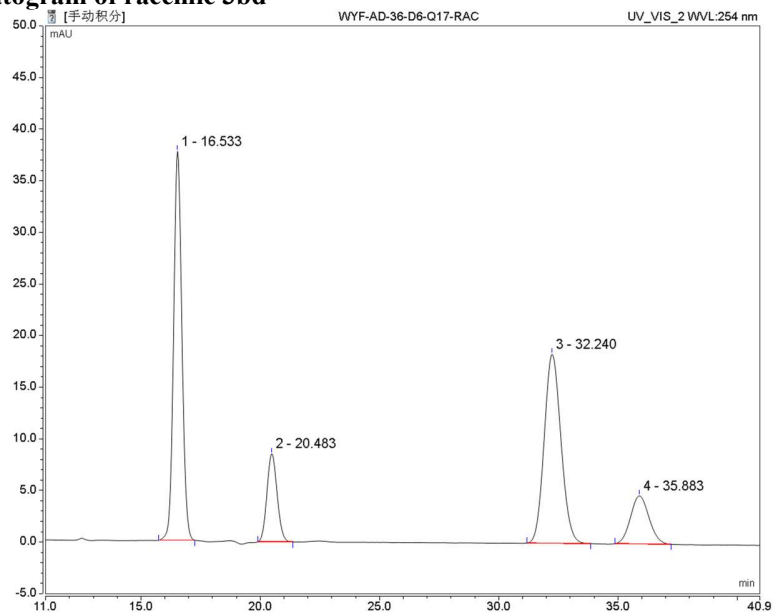

| No.    | Retention Time<br>min | Area<br>mAU*min | Relative Area<br>% |
|--------|-----------------------|-----------------|--------------------|
| 1      | 16.533                | 15.149          | 39.37              |
| 2      | 20.483                | 4.21            | 10.94              |
| 3      | 32.24                 | 14.939          | 38.82              |
| 4      | 35.883                | 4.181           | 10.87              |
| Total: |                       | 38.478          | 100                |

### HPLC chromatogram of chiral 3bd

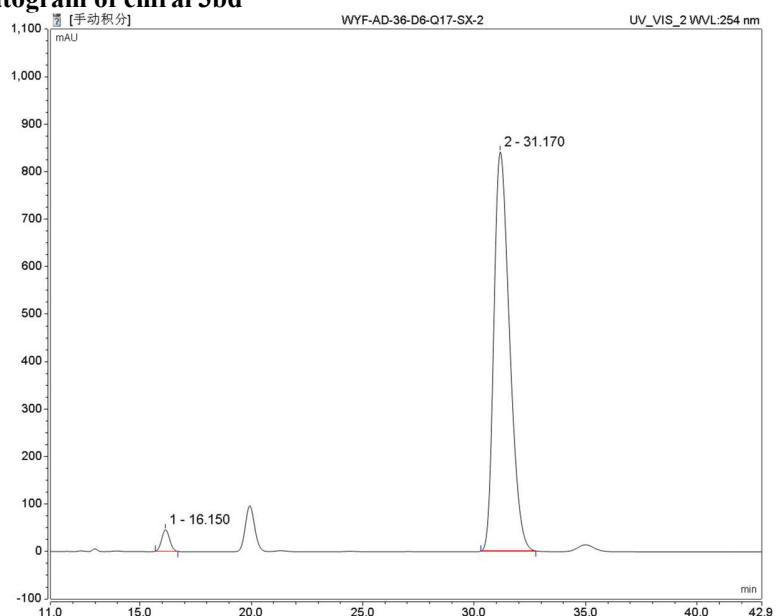

| No.    | Retention Time<br>min | Area<br>mAU*min | Relative Area<br>% |
|--------|-----------------------|-----------------|--------------------|
| 1      | 16.15                 | 18.825          | 2.67               |
| 2      | 31.17                 | 685.862         | 97.33              |
| Total: |                       | 704.688         | 100                |



### HPLC chromatogram of racemic 3be

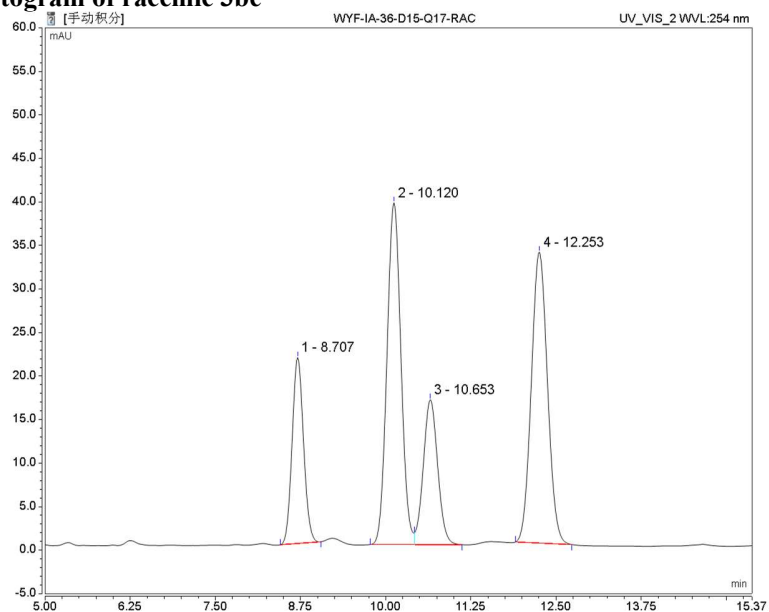

| No.    | Retention Time<br>min | Area<br>mAU*min | Relative Area<br>% |
|--------|-----------------------|-----------------|--------------------|
| 1      | 8.707                 | 4.142           | 15.51              |
| 2      | 10.12                 | 9.336           | 34.96              |
| 3      | 10.653                | 4.057           | 15.19              |
| 4      | 12.253                | 9.169           | 34.34              |
| Total: |                       | 26.704          | 100                |

### HPLC chromatogram of chiral 3be

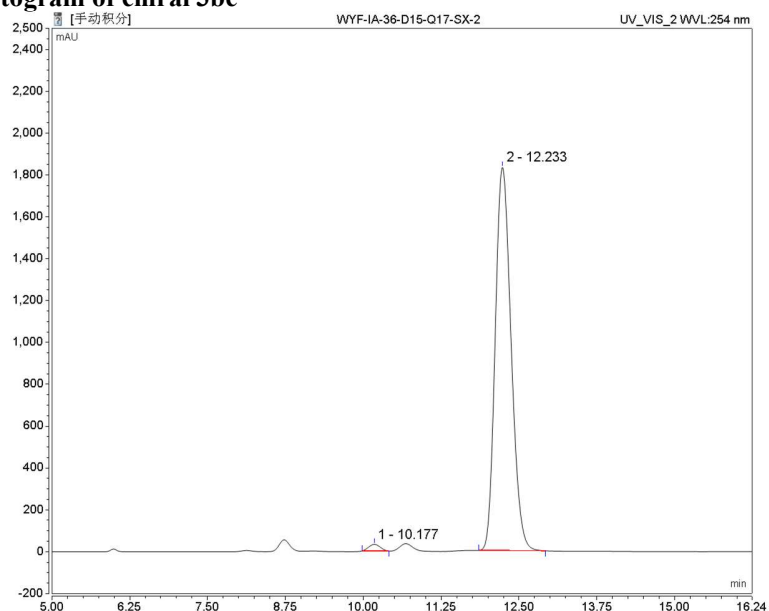

| No.    | Retention Time<br>min | Area<br>mAU*min | Relative Area<br>% |
|--------|-----------------------|-----------------|--------------------|
| 1      | 10.177                | 6.737           | 1.23               |
| 2      | 12.233                | 539.436         | 98.77              |
| Total: |                       | 546.173         | 100                |

### HPLC chromatogram of racemic 3bf

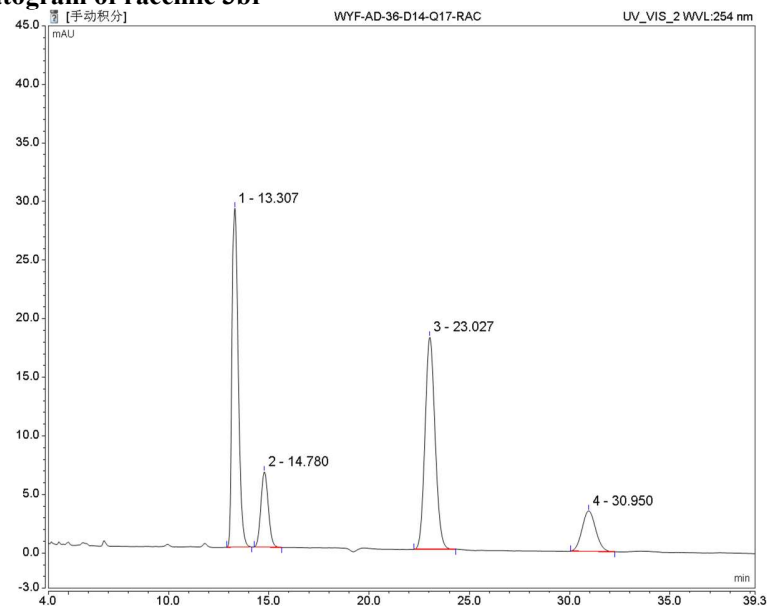

| No.    | Retention Time<br>min | Area<br>mAU*min | Relative Area<br>% |
|--------|-----------------------|-----------------|--------------------|
| 1      | 13.307                | 10.503          | 39.7               |
| 2      | 14.78                 | 2.741           | 10.36              |
| 3      | 23.027                | 10.496          | 39.68              |
| 4      | 30.95                 | 2.714           | 10.26              |
| Total: |                       | 26.454          | 100                |

### HPLC chromatogram of chiral 3bf

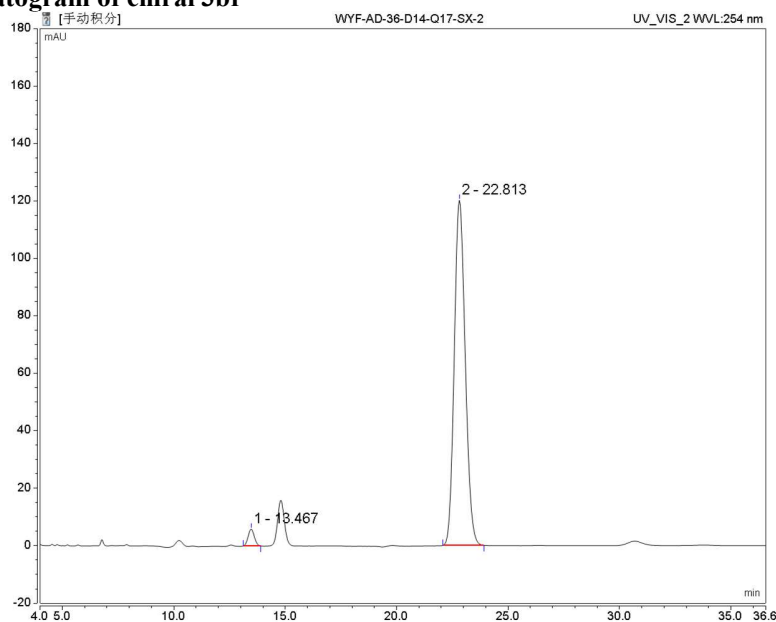

| No.    | Retention Time<br>min | Area<br>mAU*min | Relative Area<br>% |
|--------|-----------------------|-----------------|--------------------|
| 1      | 13.467                | 1.878           | 2.67               |
| 2      | 22.813                | 68.378          | 97.33              |
| Total: |                       | 70.255          | 100                |

### HPLC chromatogram of racemic 3bg

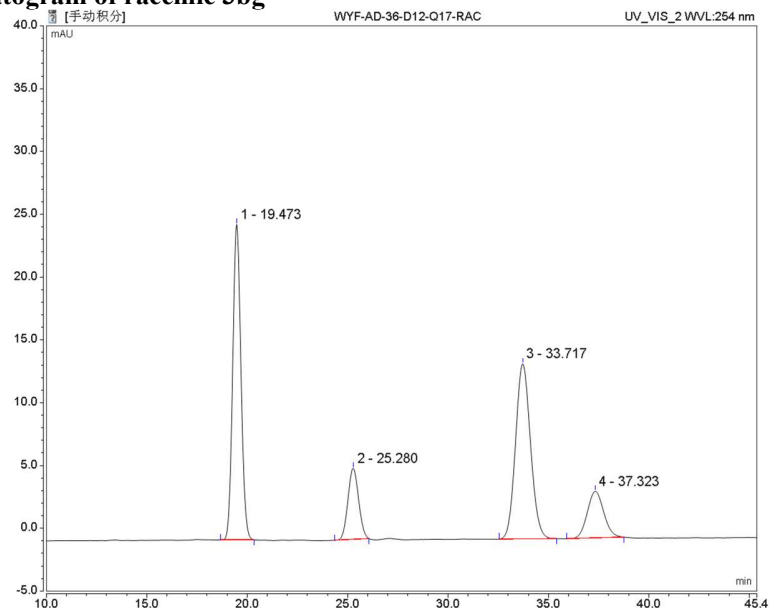

| No.    | Retention Time<br>min | Area<br>mAU*min | Relative Area<br>% |
|--------|-----------------------|-----------------|--------------------|
| 1      | 19.473                | 11.901          | 38.49              |
| 2      | 25.28                 | 3.488           | 11.28              |
| 3      | 33.717                | 12.033          | 38.91              |
| 4      | 37.323                | 3.502           | 11.32              |
| Total: |                       | 30.923          | 100                |

### HPLC chromatogram of chiral 3bg

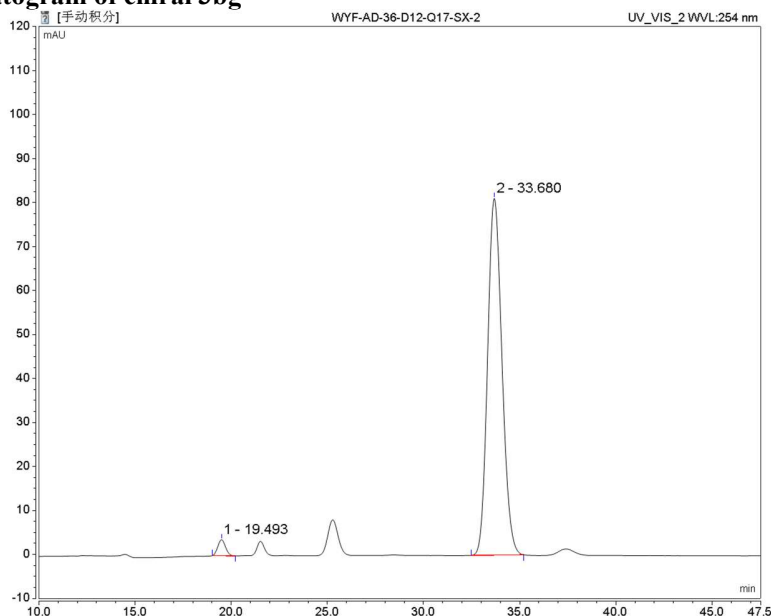

| No.    | Retention Time<br>min | Area<br>mAU*min | Relative Area<br>% |
|--------|-----------------------|-----------------|--------------------|
| 1      | 19.493                | 1.685           | 2.34               |
| 2      | 33.68                 | 70.17           | 97.66              |
| Total: |                       | 71.855          | 100                |

### HPLC chromatogram of racemic 3bh

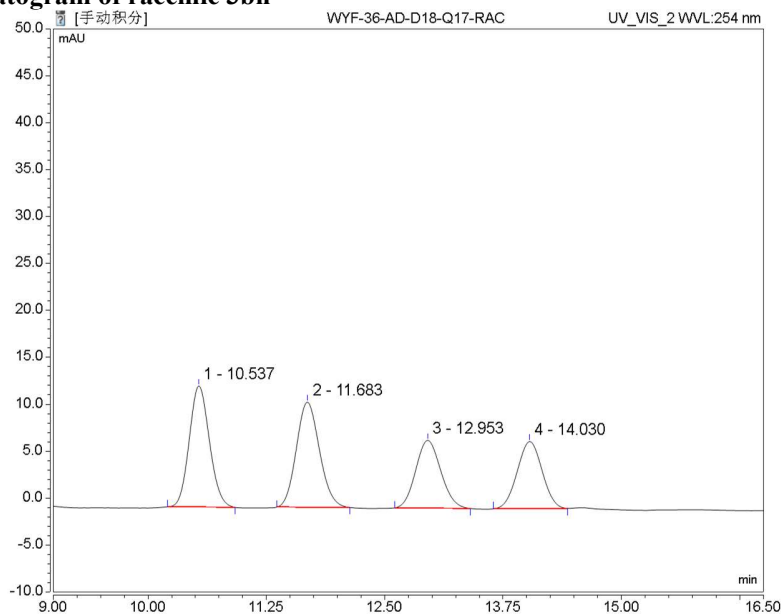

| No.    | Retention Time<br>min | Area<br>mAU*min | Relative Area<br>% |
|--------|-----------------------|-----------------|--------------------|
| 1      | 10.537                | 3.19            | 29.69              |
| 2      | 11.683                | 3.165           | 29.46              |
| 3      | 12.953                | 2.218           | 20.64              |
| 4      | 14.03                 | 2.17            | 20.2               |
| Total: |                       | 10.743          | 100                |

### HPLC chromatogram of chiral 3bh

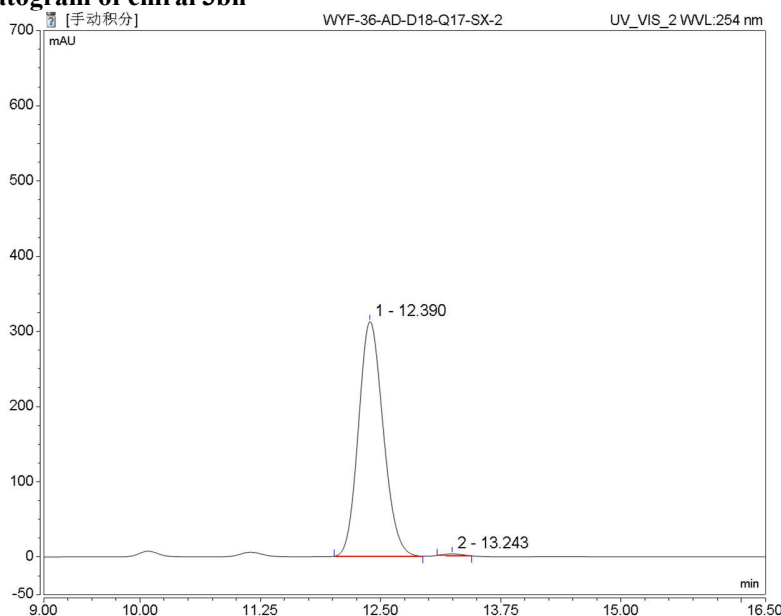

| No.    | Retention Time<br>min | Area<br>mAU*min | Relative Area<br>% |
|--------|-----------------------|-----------------|--------------------|
| 1      | 12.39                 | 92.964          | 99.44              |
| 2      | 13.243                | 0.519           | 0.56               |
| Total: |                       | 93.483          | 100                |

### HPLC chromatogram of racemic 3bi

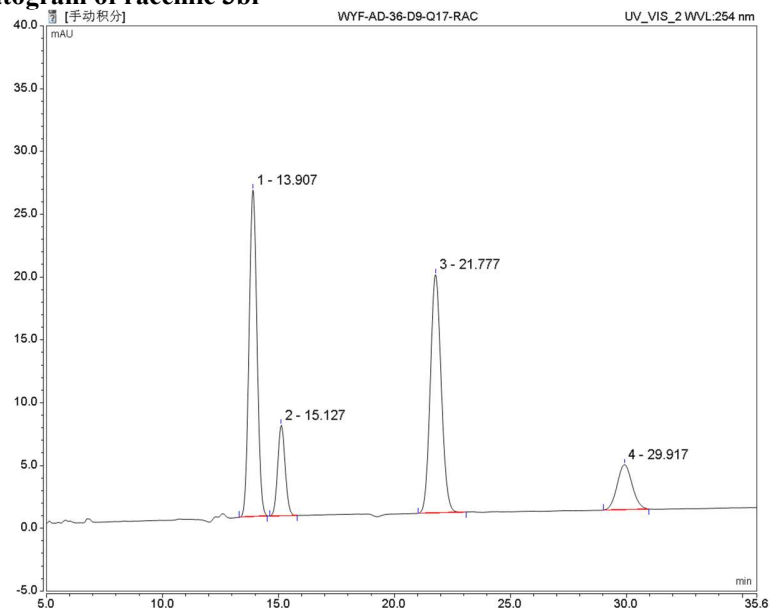

| No.    | Retention Time<br>min | Area<br>mAU*min | Relative Area<br>% |
|--------|-----------------------|-----------------|--------------------|
| 1      | 13.907                | 10.29           | 39.57              |
| 2      | 15.127                | 2.694           | 10.36              |
| 3      | 21.777                | 10.329          | 39.72              |
| 4      | 29.917                | 2.69            | 10.34              |
| Total: |                       | 26.002          | 100                |

### HPLC chromatogram of chiral 3bi

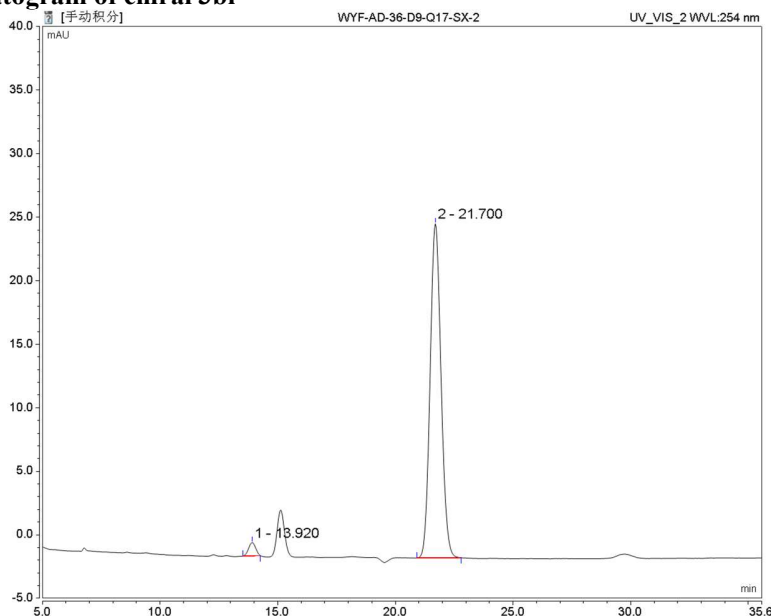

| No.    | Retention Time<br>min | Area<br>mAU*min | Relative Area<br>% |
|--------|-----------------------|-----------------|--------------------|
| 1      | 13.92                 | 0.365           | 2.52               |
| 2      | 21.7                  | 14.093          | 97.48              |
| Total: |                       | 14.458          | 100                |

### HPLC chromatogram of racemic 3bj

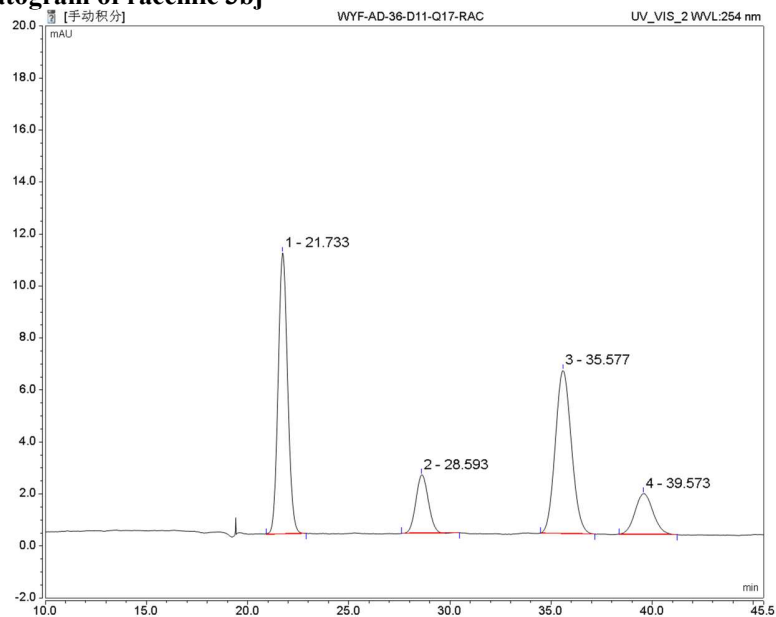

| No.    | Retention Time<br>min | Area<br>mAU*min | Relative Area<br>% |
|--------|-----------------------|-----------------|--------------------|
| 1      | 21.733                | 5.857           | 39.47              |
| 2      | 28.593                | 1.587           | 10.69              |
| 3      | 35.577                | 5.781           | 38.95              |
| 4      | 39.573                | 1.616           | 10.89              |
| Total: |                       | 14.841          | 100                |

### HPLC chromatogram of chiral 3bj

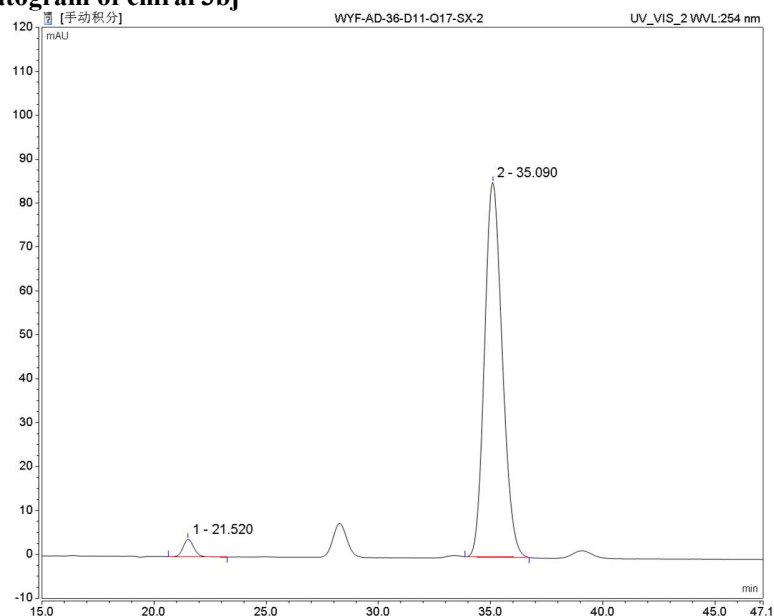

| No.    | Retention Time<br>min | Area<br>mAU*min | Relative Area<br>% |
|--------|-----------------------|-----------------|--------------------|
| 1      | 21.52                 | 2.198           | 2.74               |
| 2      | 35.09                 | 78.141          | 97.26              |
| Total: |                       | 80.339          | 100                |

### HPLC chromatogram of racemic 3bk

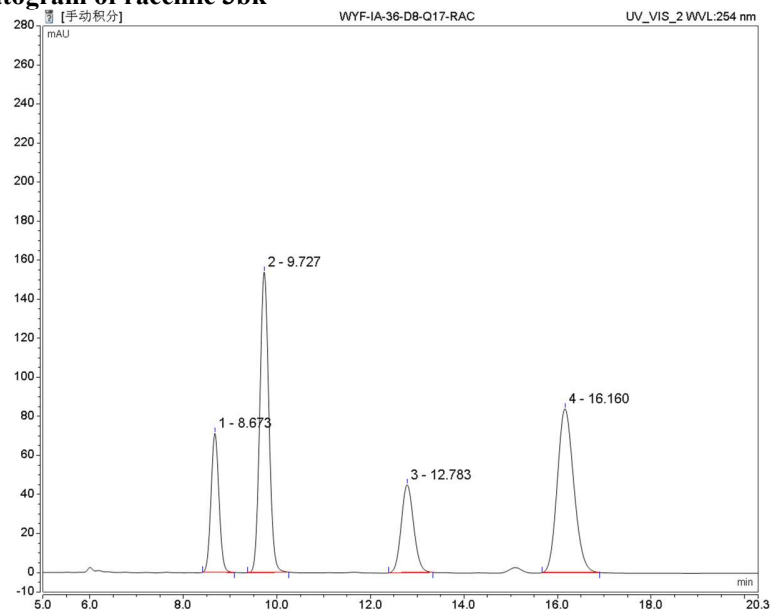

| No.    | Retention Time<br>min | Area<br>mAU*min | Relative Area<br>% |
|--------|-----------------------|-----------------|--------------------|
| 1      | 8.673                 | 13.962          | 14.47              |
| 2      | 9.727                 | 34.475          | 35.73              |
| 3      | 12.783                | 13.851          | 14.36              |
| 4      | 16.16                 | 34.197          | 35.44              |
| Total: |                       | 96.486          | 100                |

### HPLC chromatogram of chiral 3bk

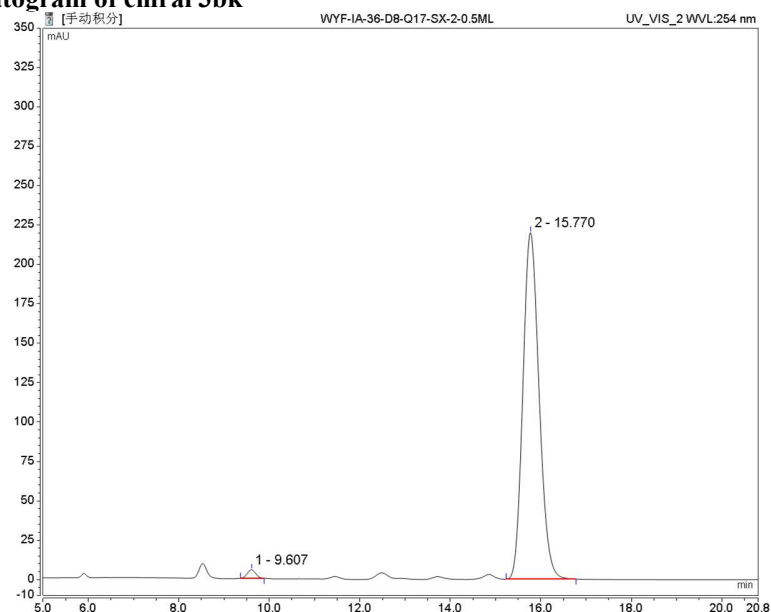

| No.    | Retention Time<br>min | Area<br>mAU*min | Relative Area<br>% |
|--------|-----------------------|-----------------|--------------------|
| 1      | 9.607                 | 1.171           | 1.27               |
| 2      | 15.77                 | 90.993          | 98.73              |
| Total: |                       | 92.164          | 100                |

### HPLC chromatogram of racemic 3bl

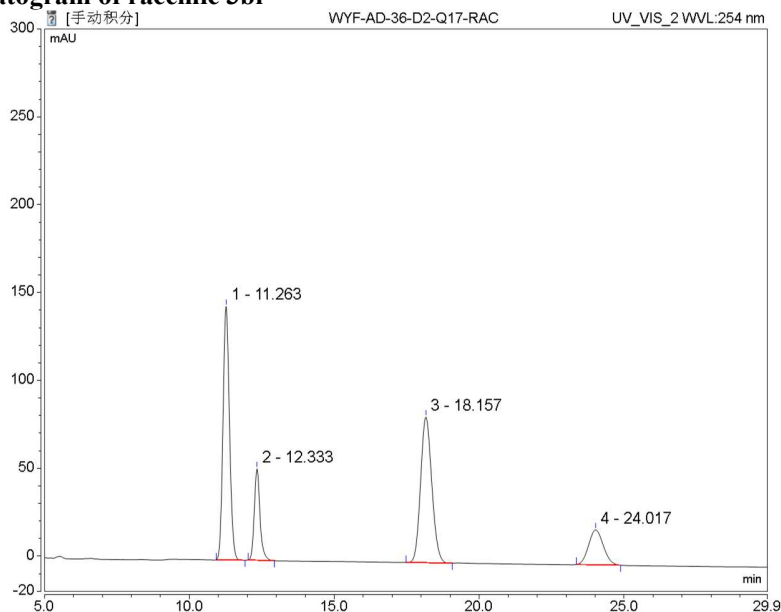

| No.    | Retention Time<br>min | Area<br>mAU*min | Relative Area<br>% |
|--------|-----------------------|-----------------|--------------------|
| 1      | 11.263                | 37.189          | 37.94              |
| 2      | 12.333                | 11.942          | 12.19              |
| 3      | 18.157                | 37.153          | 37.91              |
| 4      | 24.017                | 11.723          | 11.96              |
| Total: |                       | 98.007          | 100                |

### HPLC chromatogram of chiral 3bl

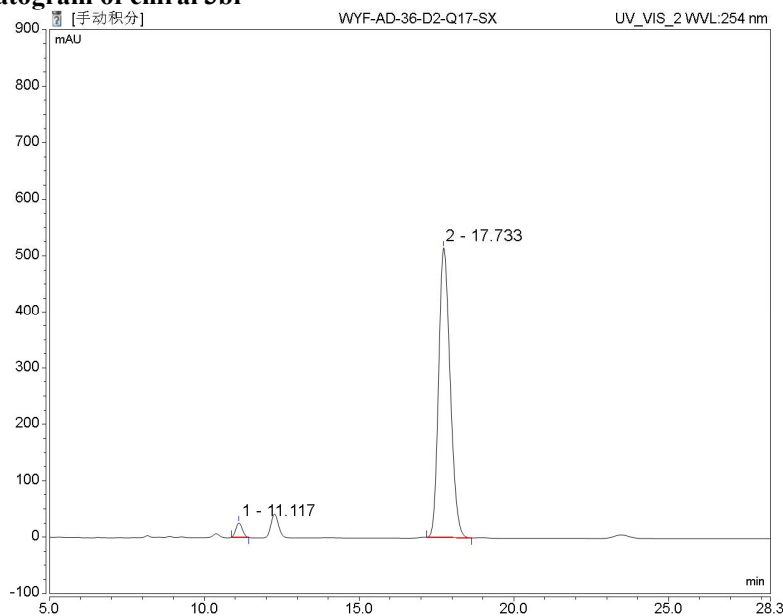

| No.    | Retention Time<br>min | Area<br>mAU*min | Relative Area<br>% |
|--------|-----------------------|-----------------|--------------------|
| 1      | 11.117                | 6.328           | 2.77               |
| 2      | 17.733                | 221.949         | 97.23              |
| Total: |                       | 228.277         | 100                |



### HPLC chromatogram of racemic 3bm

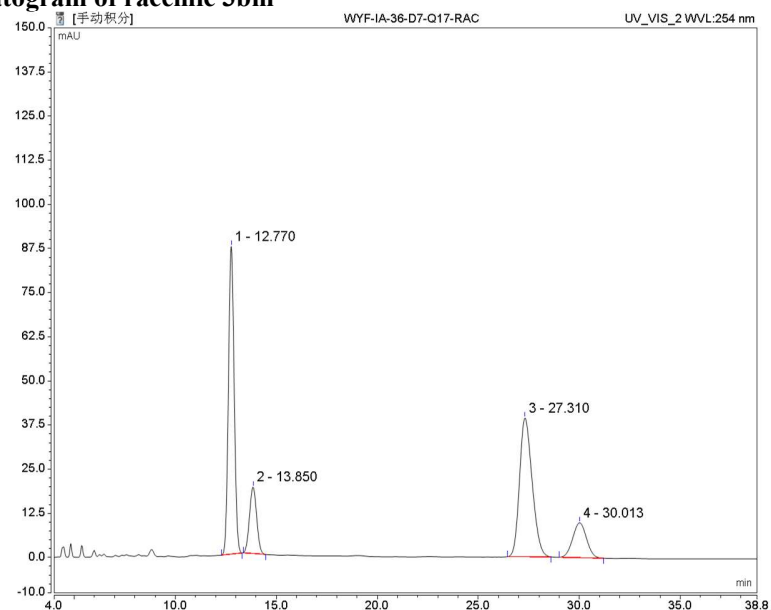

| No.    | Retention Time<br>min | Area<br>mAU*min | Relative Area<br>% |
|--------|-----------------------|-----------------|--------------------|
| 1      | 12.77                 | 28.535          | 39.33              |
| 2      | 13.85                 | 7.736           | 10.66              |
| 3      | 27.31                 | 28.439          | 39.19              |
| 4      | 30.013                | 7.848           | 10.82              |
| Total: |                       | 72.557          | 100                |

### HPLC chromatogram of chiral 3bm

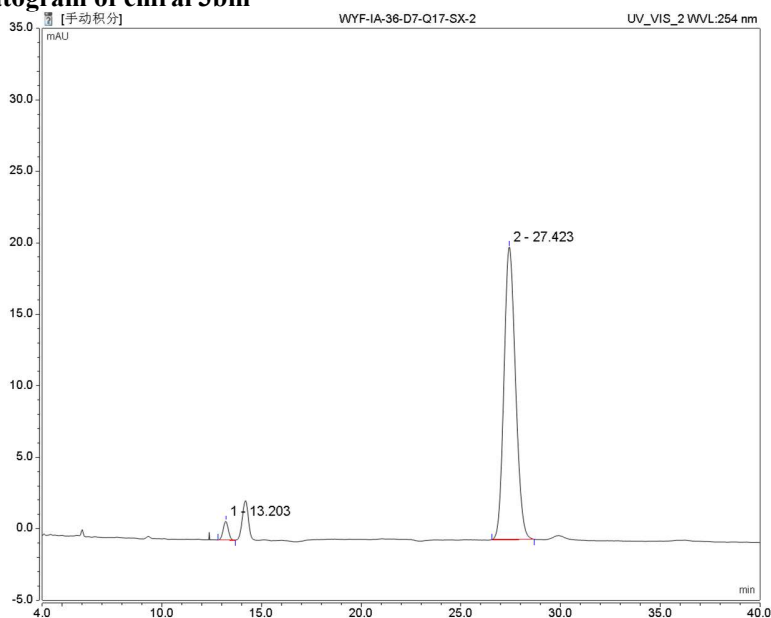

| No.    | Retention Time<br>min | Area<br>mAU*min | Relative Area<br>% |
|--------|-----------------------|-----------------|--------------------|
| 1      | 13.203                | 0.391           | 2.77               |
| 2      | 27.423                | 13.722          | 97.23              |
| Total: |                       | 14.114          | 100                |

### HPLC chromatogram of racemic 3bn

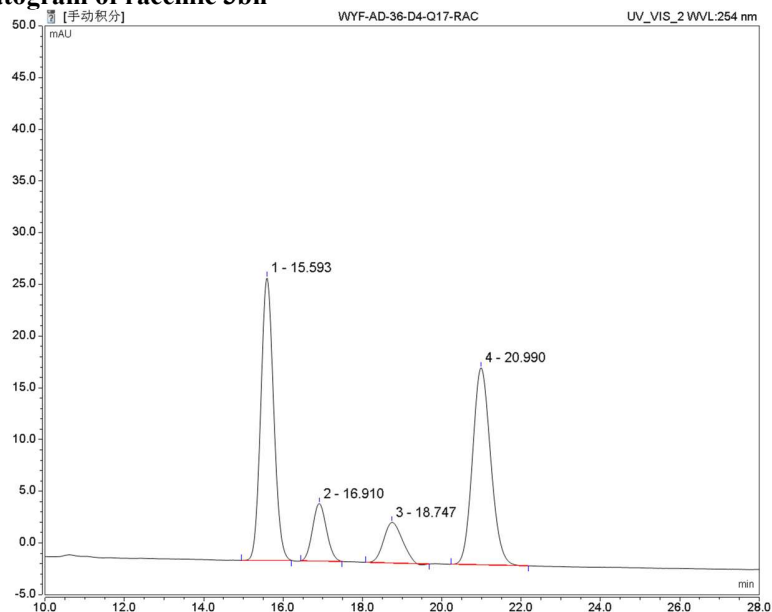

| No.    | Retention Time<br>min | Area<br>mAU*min | Relative Area<br>% |
|--------|-----------------------|-----------------|--------------------|
| 1      | 15.593                | 10.248          | 41.39              |
| 2      | 16.91                 | 2.27            | 9.17               |
| 3      | 18.747                | 2.136           | 8.63               |
| 4      | 20.99                 | 10.109          | 40.82              |
| Total: |                       | 24.763          | 100                |

### HPLC chromatogram of chiral 3bn

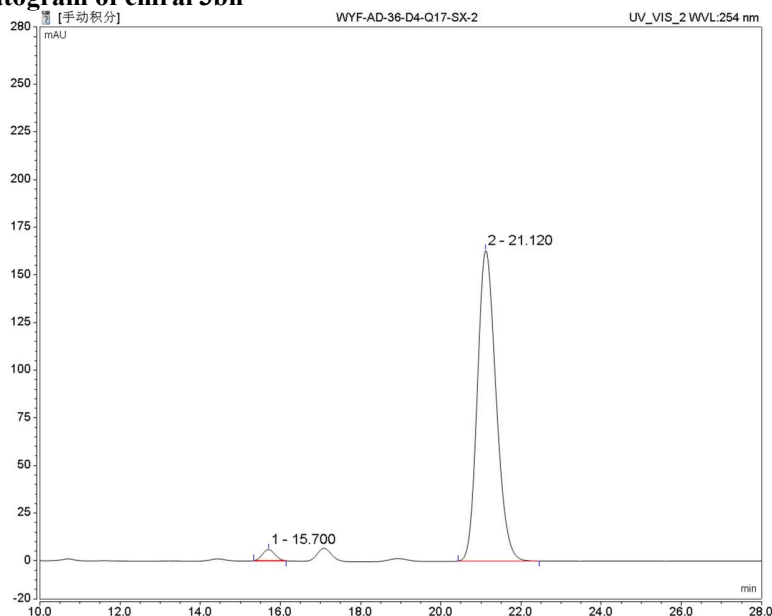

| No.    | Retention Time<br>min | Area<br>mAU*min | Relative Area<br>% |
|--------|-----------------------|-----------------|--------------------|
| 1      | 15.7                  | 2.134           | 2.37               |
| 2      | 21.12                 | 87.808          | 97.63              |
| Total: |                       | 89.942          | 100                |

### HPLC chromatogram of racemic 3bo

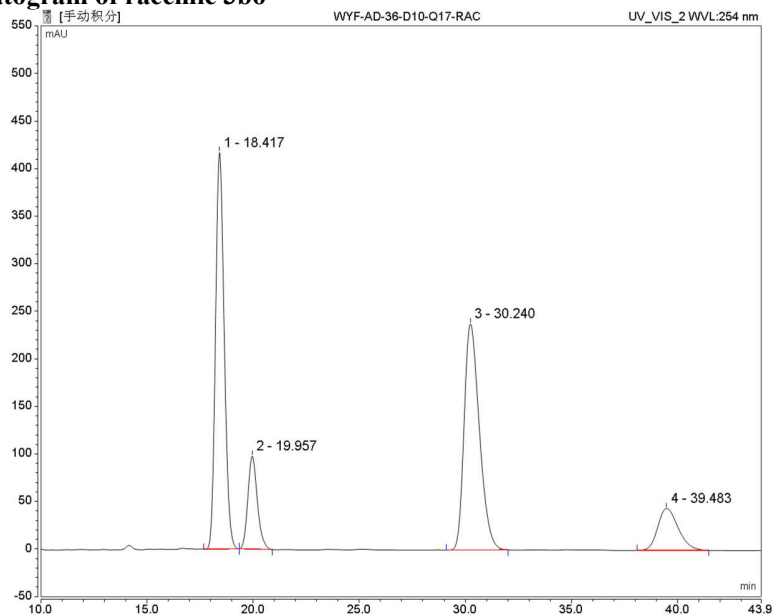

| No.    | Retention Time<br>min | Area<br>mAU*min | Relative Area<br>% |
|--------|-----------------------|-----------------|--------------------|
| 1      | 18.417                | 197.635         | 39.91              |
| 2      | 19.957                | 50.748          | 10.25              |
| 3      | 30.24                 | 197.746         | 39.94              |
| 4      | 39.483                | 49.025          | 9.9                |
| Total: |                       | 495.154         | 100                |

### HPLC chromatogram of chiral 3bo

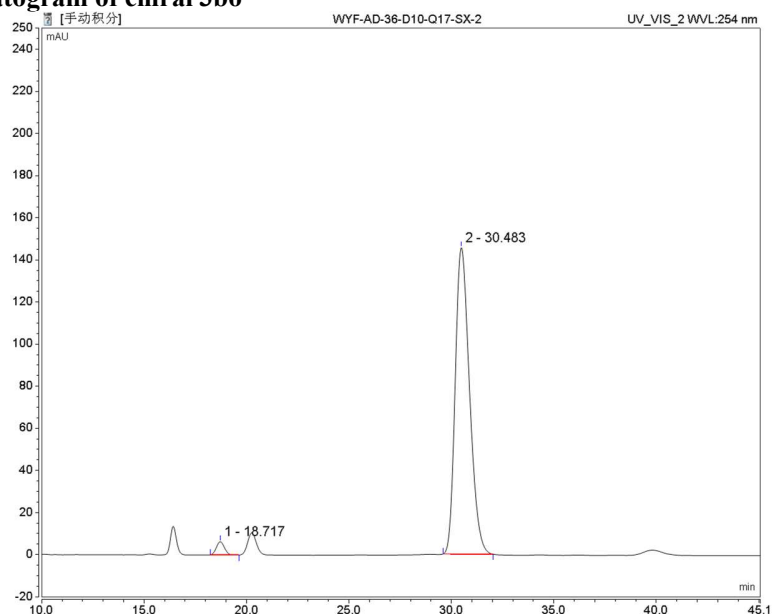

| No.    | Retention Time<br>min | Area<br>mAU*min | Relative Area<br>% |
|--------|-----------------------|-----------------|--------------------|
| 1      | 18.717                | 2.82            | 2.34               |
| 2      | 30.483                | 117.605         | 97.66              |
| Total: |                       | 120.425         | 100                |

### HPLC chromatogram of racemic 3bp

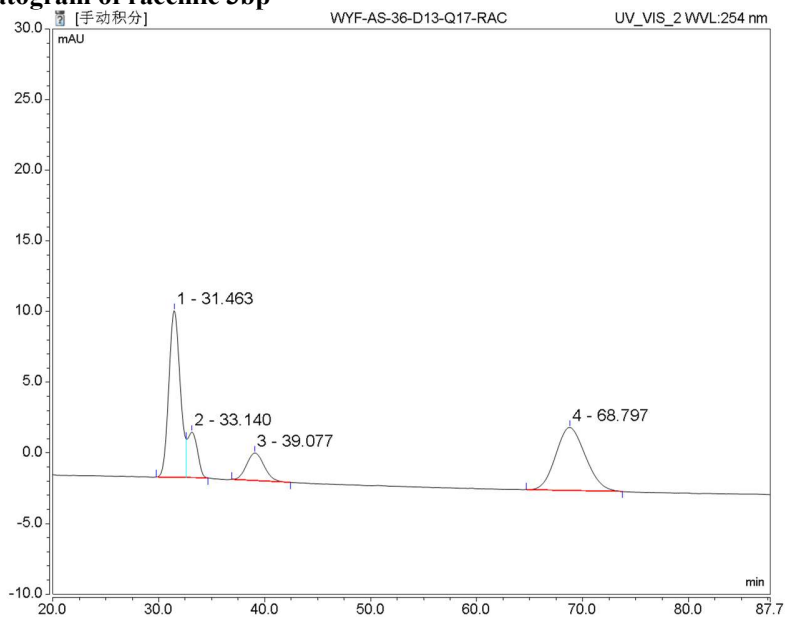

| No.    | Retention Time<br>min | Area<br>mAU*min | Relative Area<br>% |
|--------|-----------------------|-----------------|--------------------|
| 1      | 31.463                | 14.704          | 40.3               |
| 2      | 33.14                 | 3.56            | 9.76               |
| 3      | 39.077                | 3.734           | 10.23              |
| 4      | 68.797                | 14.488          | 39.71              |
| Total: |                       | 36.486          | 100                |

### HPLC chromatogram of chiral 3bp

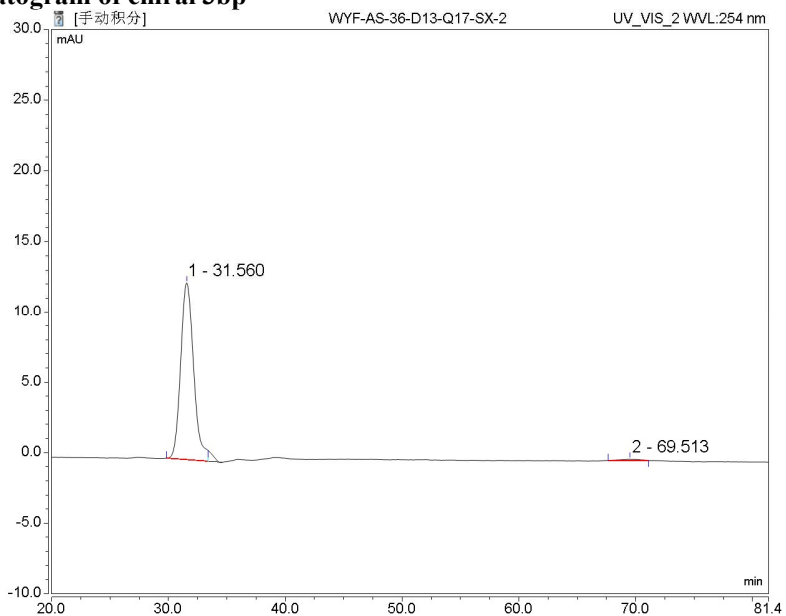

| No.    | Retention Time<br>min | Area<br>mAU*min | Relative Area<br>% |
|--------|-----------------------|-----------------|--------------------|
| 1      | 31.56                 | 16.122          | 99.04              |
| 2      | 69.513                | 0.156           | 0.96               |
| Total: |                       | 16.278          | 100                |

### HPLC chromatogram of racemic 3bq

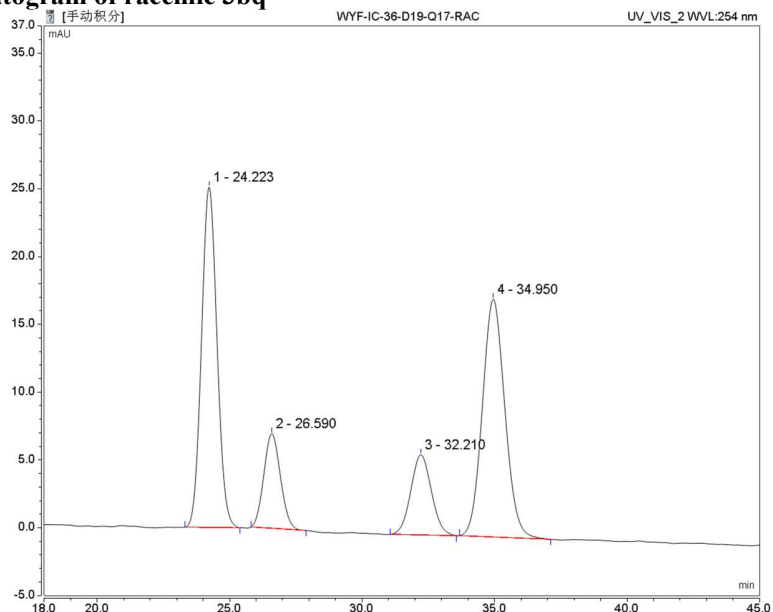

| No.    | Retention Time<br>min | Area<br>mAU*min | Relative Area<br>% |
|--------|-----------------------|-----------------|--------------------|
| 1      | 24.223                | 16.977          | 38.07              |
| 2      | 26.59                 | 5.067           | 11.36              |
| 3      | 32.21                 | 5.334           | 11.96              |
| 4      | 34.95                 | 17.222          | 38.61              |
| Total: |                       | 44.599          | 100                |

### HPLC chromatogram of chiral 3bq

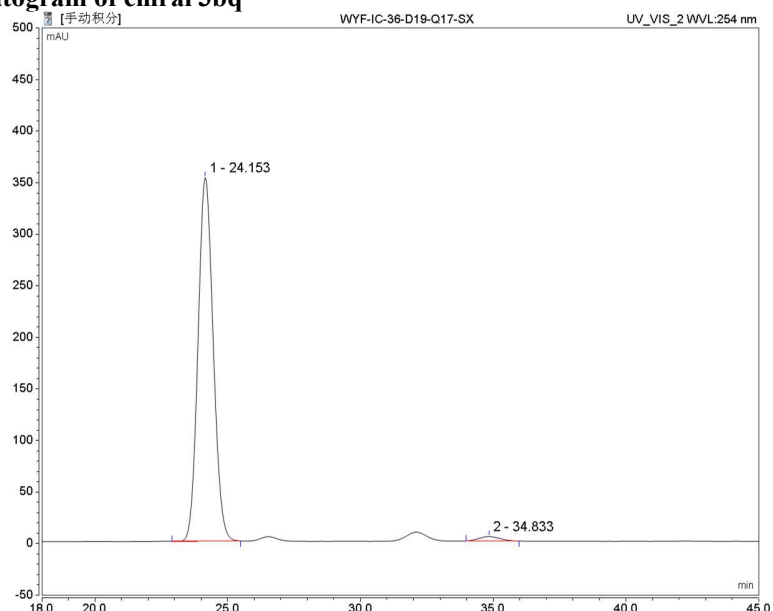

| No.    | Retention Time<br>min | Area<br>mAU*min | Relative Area<br>% |
|--------|-----------------------|-----------------|--------------------|
| 1      | 24.153                | 233             | 98.37              |
| 2      | 34.833                | 3.862           | 1.63               |
| Total: |                       | 236.862         | 100                |

### HPLC chromatogram of racemic 3br

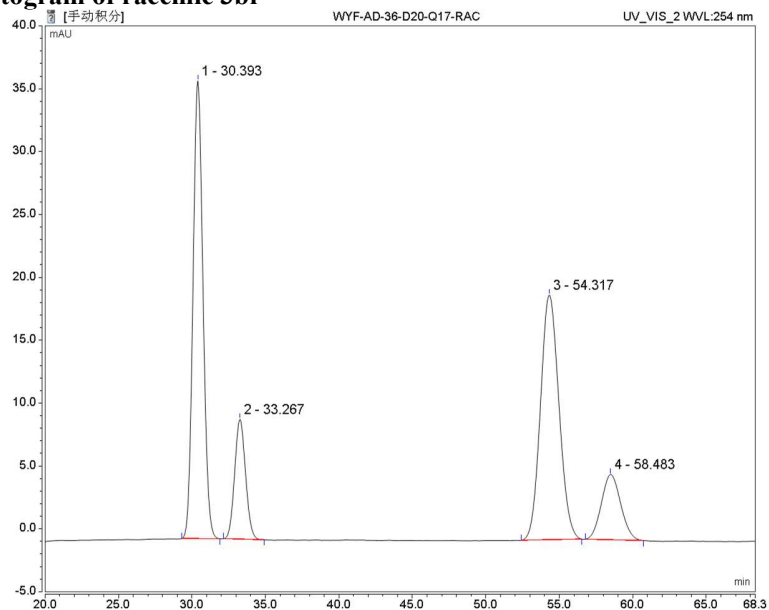

| No.    | Retention Time<br>min | Area<br>mAU*min | Relative Area<br>% |
|--------|-----------------------|-----------------|--------------------|
| 1      | 30.393                | 28.629          | 39.21              |
| 2      | 33.267                | 8.185           | 11.21              |
| 3      | 54.317                | 28.312          | 38.77              |
| 4      | 58.483                | 7.896           | 10.81              |
| Total: |                       | 73.022          | 100                |

### HPLC chromatogram of chiral 3br

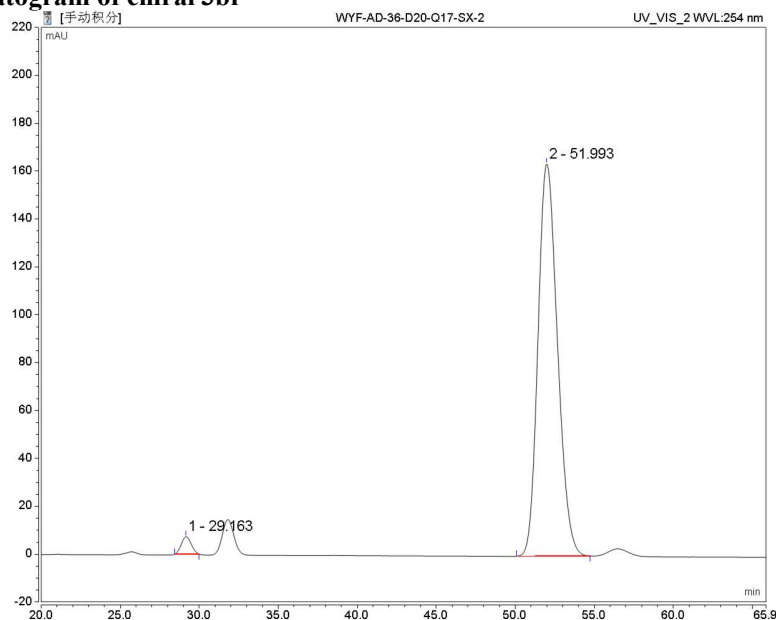

| No.    | Retention Time<br>min | Area<br>mAU*min | Relative Area<br>% |
|--------|-----------------------|-----------------|--------------------|
| 1      | 29.163                | 5.243           | 2.2                |
| 2      | 51.993                | 233.616         | 97.8               |
| Total: |                       | 238.859         | 100                |

### HPLC chromatogram of racemic 3bs

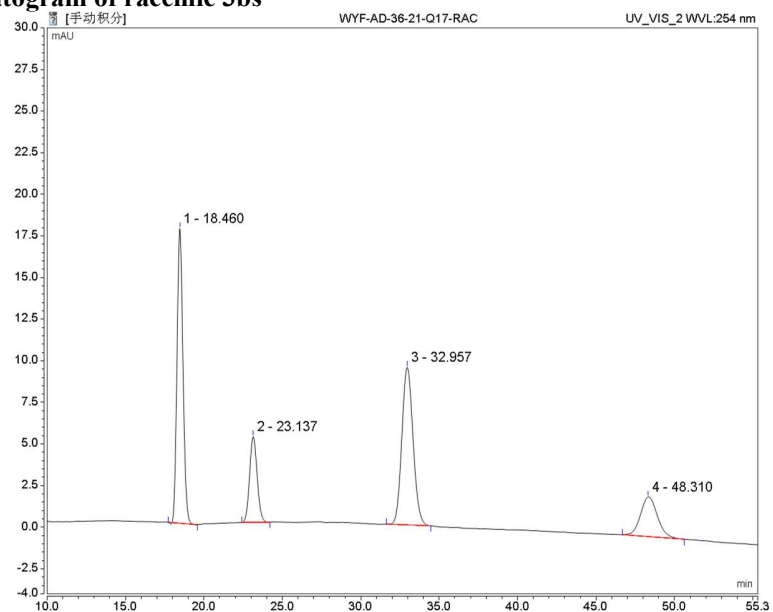

| No.    | Retention Time<br>min | Area<br>mAU*min | Relative Area<br>% |
|--------|-----------------------|-----------------|--------------------|
| 1      | 18.46                 | 7.786           | 36.25              |
| 2      | 23.137                | 2.867           | 13.35              |
| 3      | 32.957                | 7.85            | 36.55              |
| 4      | 48.31                 | 2.977           | 13.86              |
| Total: |                       | 21.48           | 100                |

### HPLC chromatogram of chiral 3bs

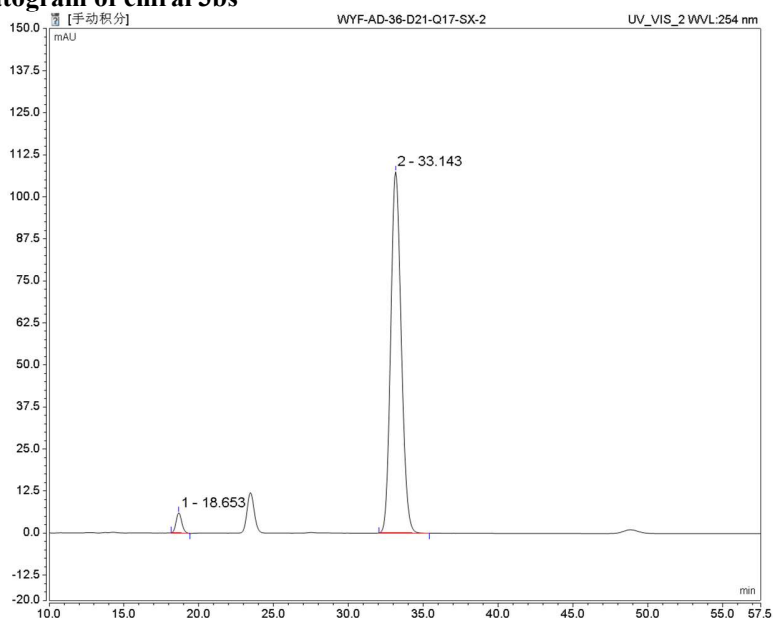

| No.    | Retention Time<br>min | Area<br>mAU*min | Relative Area<br>% |
|--------|-----------------------|-----------------|--------------------|
| 1      | 18.653                | 2.674           | 2.96               |
| 2      | 33.143                | 87.531          | 97.04              |
| Total: |                       | 90.204          | 100                |

### HPLC chromatogram of racemic 3bt

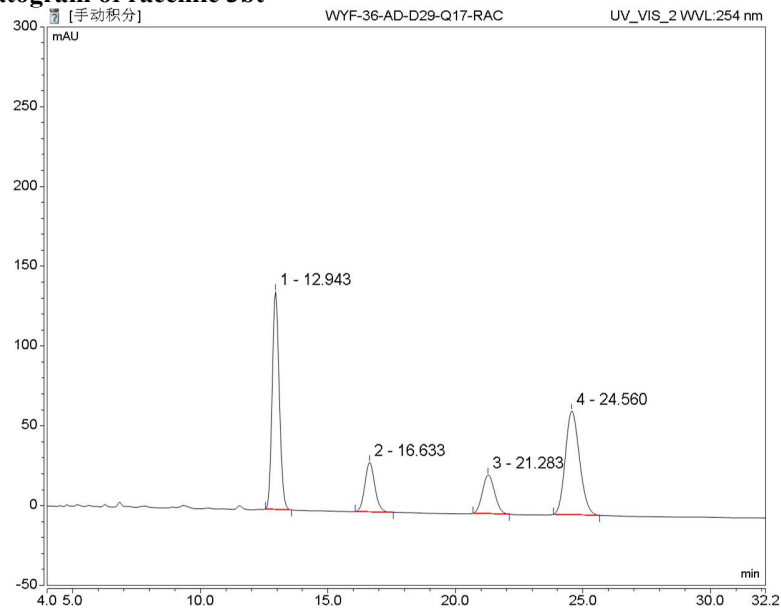

| No.    | Retention Time<br>min | Area<br>mAU*min | Relative Area<br>% |
|--------|-----------------------|-----------------|--------------------|
| 1      | 12.943                | 43.689          | 38.63              |
| 2      | 16.633                | 14.023          | 12.4               |
| 3      | 21.283                | 13.377          | 11.83              |
| 4      | 24.56                 | 42.008          | 37.14              |
| Total: |                       | 113.097         | 100                |

### HPLC chromatogram of chiral 3bt

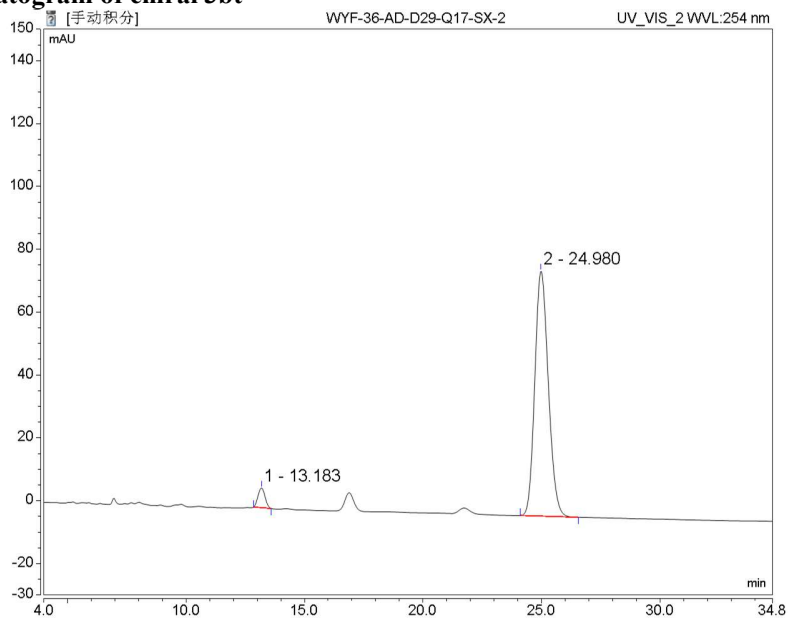

| No.    | Retention Time<br>min | Area<br>mAU*min | Relative Area<br>% |
|--------|-----------------------|-----------------|--------------------|
| 1      | 13.183                | 2.151           | 4.01               |
| 2      | 24.98                 | 51.495          | 95.99              |
| Total: |                       | 53.646          | 100                |



### HPLC chromatogram of racemic 3bu

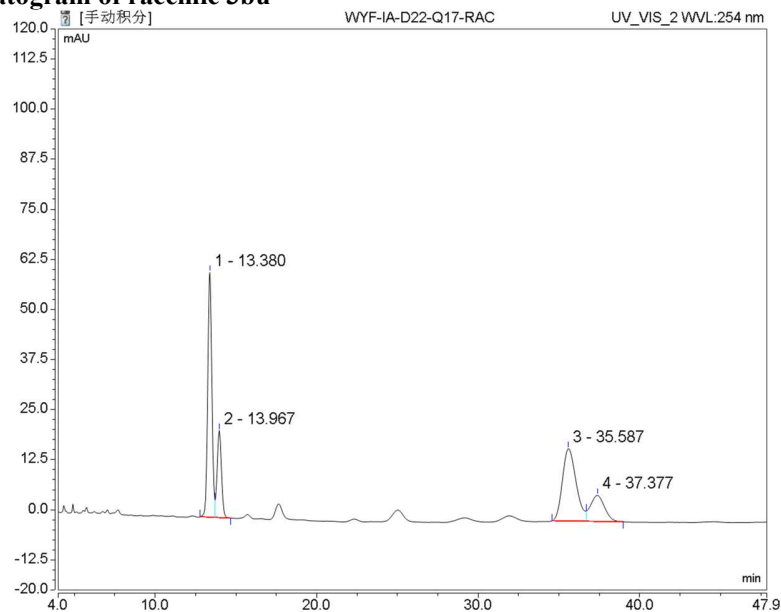

| No.    | Retention Time<br>min | Area<br>mAU*min | Relative Area<br>% |
|--------|-----------------------|-----------------|--------------------|
| 1      | 13.38                 | 18.097          | 36.79              |
| 2      | 13.967                | 6.785           | 13.79              |
| 3      | 35.587                | 17.755          | 36.1               |
| 4      | 37.377                | 6.553           | 13.32              |
| Total: |                       | 49.19           | 100                |

### HPLC chromatogram of chiral 3bu

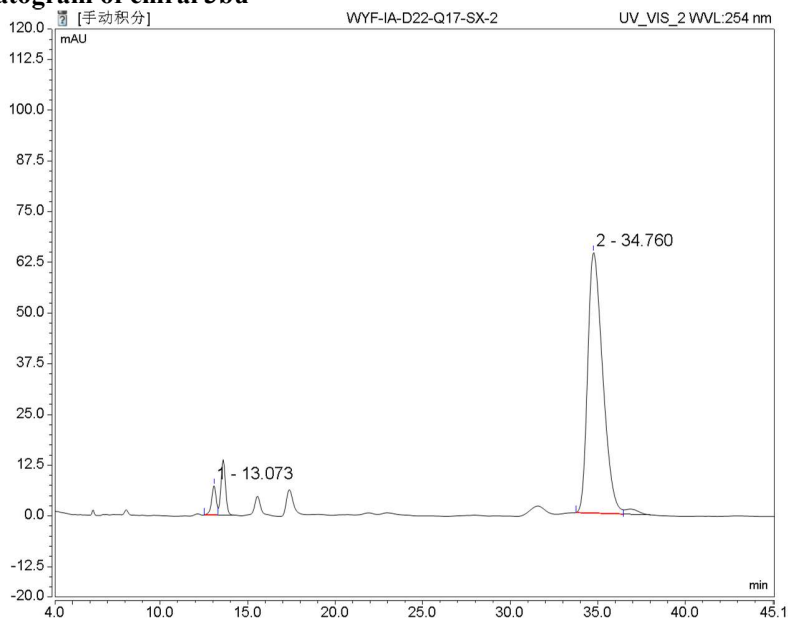

| No.    | Retention Time<br>min | Area<br>mAU*min | Relative Area<br>% |
|--------|-----------------------|-----------------|--------------------|
| 1      | 13.073                | 2.155           | 3.27               |
| 2      | 34.76                 | 63.838          | 96.73              |
| Total: |                       | 65.992          | 100                |

### HPLC chromatogram of racemic 3bv

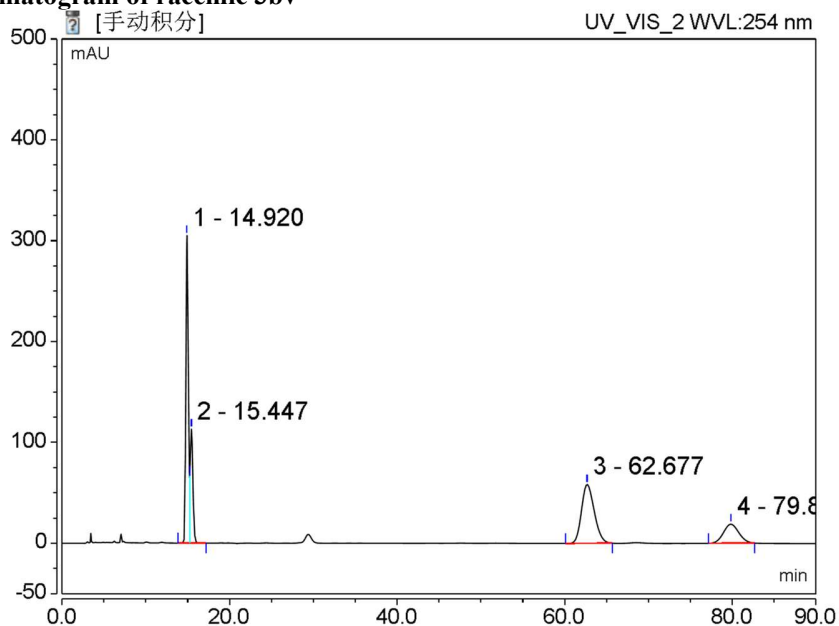

| No.    | Retention Time<br>min | Area<br>mAU*min | Relative Area<br>% |
|--------|-----------------------|-----------------|--------------------|
| 1      | 14.92                 | 104.107         | 36.2               |
| 2      | 15.447                | 40.51           | 14.09              |
| 3      | 62.677                | 102.839         | 35.76              |
| 4      | 79.827                | 40.099          | 13.94              |
| Total: |                       | 287.555         | 100                |

### HPLC chromatogram of chiral 3bv

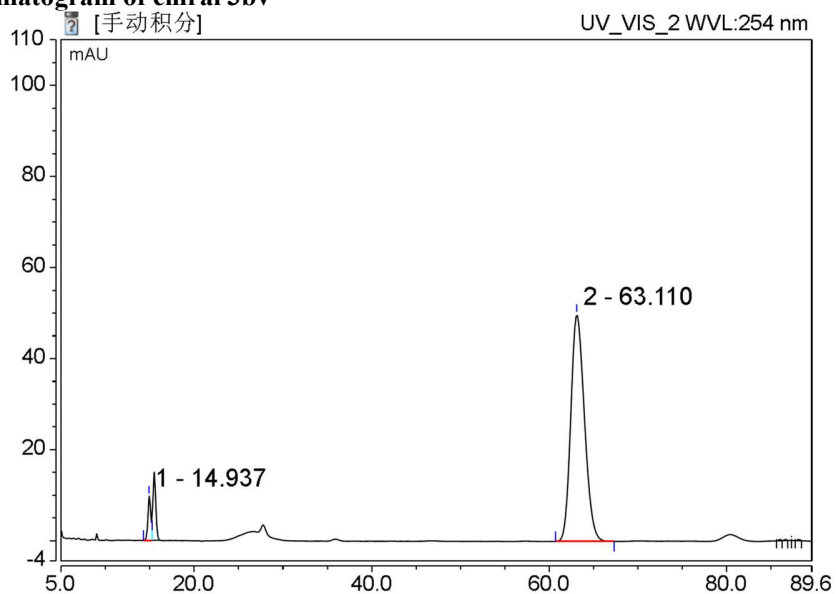

| No.    | Retention Time<br>min | Area<br>mAU*min | Relative Area<br>% |
|--------|-----------------------|-----------------|--------------------|
| 1      | 14.937                | 3.616           | 3.91               |
| 2      | 63.11                 | 88.817          | 96.09              |
| Total: |                       | 92.433          | 100                |

### HPLC chromatogram of racemic 3bw

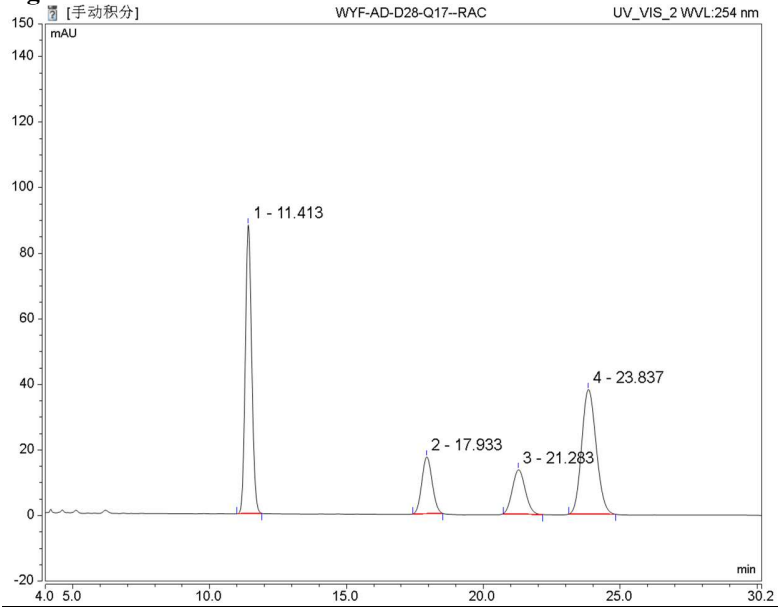

| No.    | Retention Time<br>min | Area<br>mAU*min | Relative Area<br>% |
|--------|-----------------------|-----------------|--------------------|
| 1      | 11.413                | 23.69           | 38.17              |
| 2      | 17.933                | 7.591           | 12.23              |
| 3      | 21.283                | 7.377           | 11.89              |
| 4      | 23.837                | 23.403          | 37.71              |
| Total: |                       | 62.061          | 100                |

### HPLC chromatogram of chiral 3bw

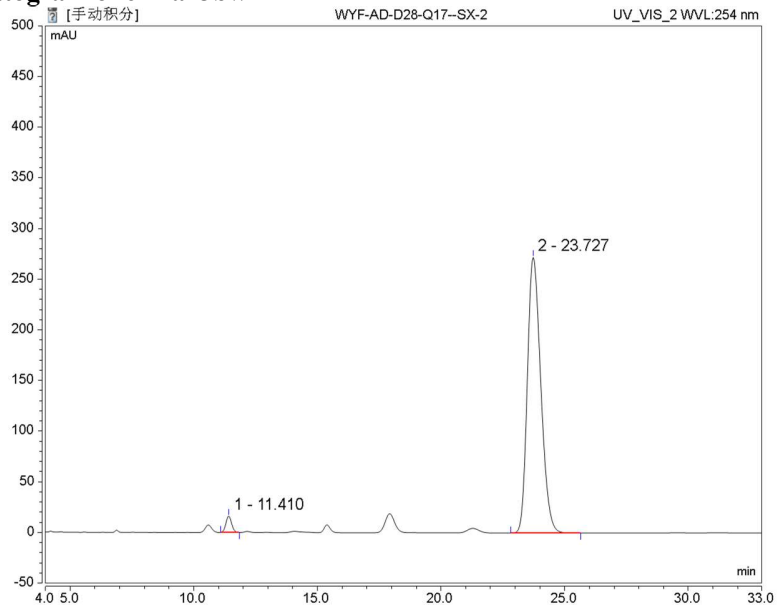

| No.    | Retention Time<br>min | Area<br>mAU*min | Relative Area<br>% |
|--------|-----------------------|-----------------|--------------------|
| 1      | 11.41                 | 4.312           | 2.46               |
| 2      | 23.727                | 171.082         | 97.54              |
| Total: |                       | 175.395         | 100                |

### HPLC chromatogram of racemic 3bx

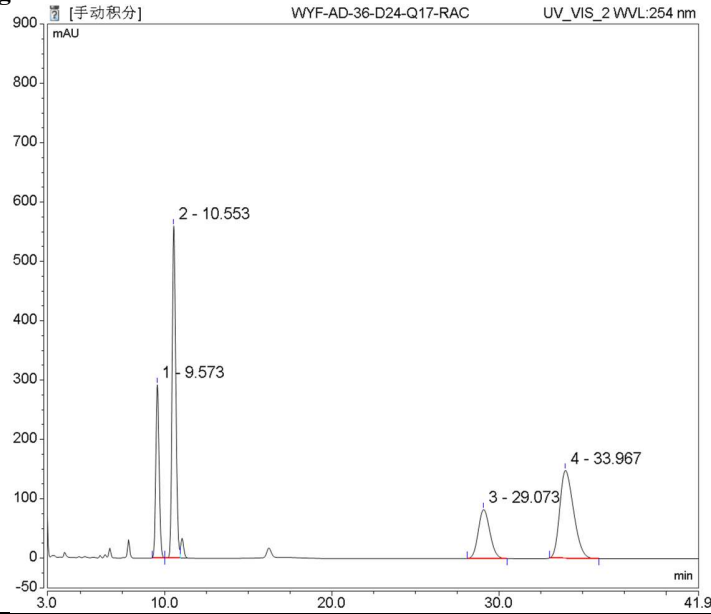

| No.    | Retention Time<br>min | Area<br>mAU*min | Relative Area<br>% |
|--------|-----------------------|-----------------|--------------------|
| 1      | 9.573                 | 67.008          | 16.07              |
| 2      | 10.553                | 143             | 34.3               |
| 3      | 29.073                | 65.978          | 15.83              |
| 4      | 33.967                | 140.927         | 33.8               |
| Total: |                       | 416.914         | 100                |

### HPLC chromatogram of chiral 3bx

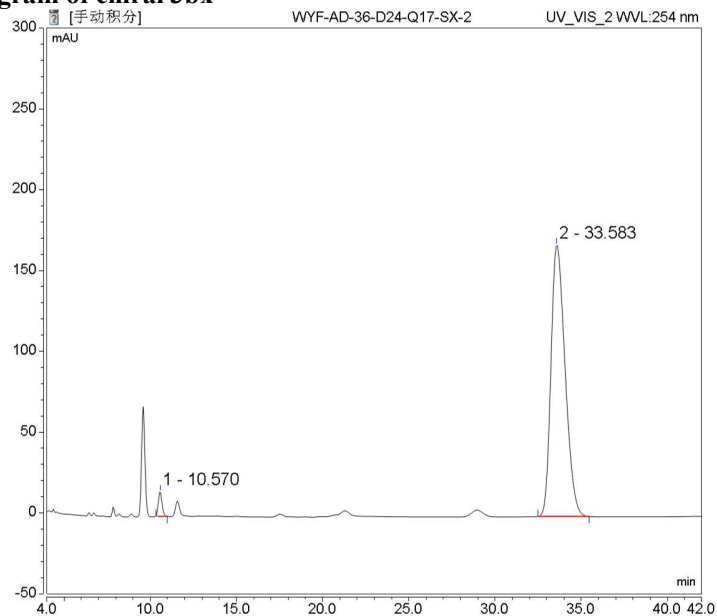

| No.    | Retention Time<br>min | Area<br>mAU*min | Relative Area<br>% |
|--------|-----------------------|-----------------|--------------------|
| 1      | 10.57                 | 3.685           | 2.26               |
| 2      | 33.583                | 159.314         | 97.74              |
| Total: |                       | 162.999         | 100                |

### HPLC chromatogram of racemic 3by

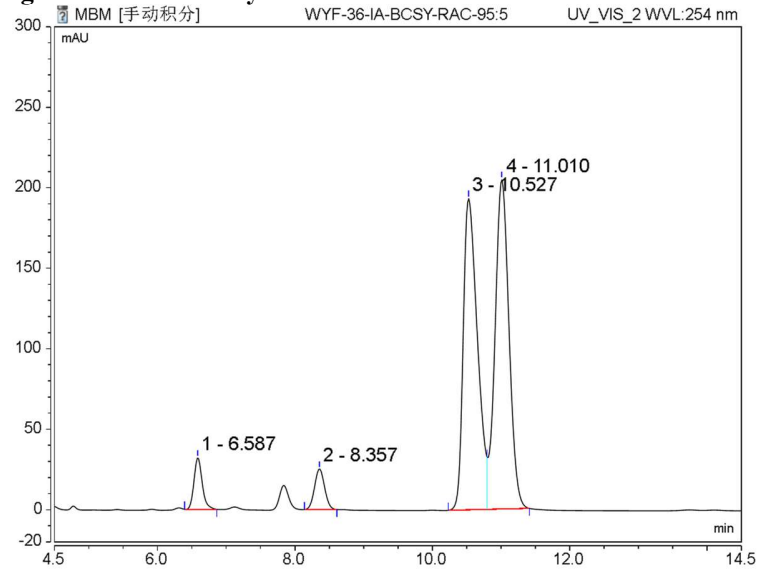

| No.    | Retention Time<br>min | Area<br>mAU*min | Relative Area<br>% |
|--------|-----------------------|-----------------|--------------------|
| 1      | 6.587                 | 4.454           | 4.32               |
| 2      | 8.357                 | 4.281           | 4.15               |
| 3      | 10.527                | 46.11           | 44.72              |
| 4      | 11.01                 | 48.274          | 46.81              |
| Total: |                       | 103.119         | 100                |

### HPLC chromatogram of chiral 3by

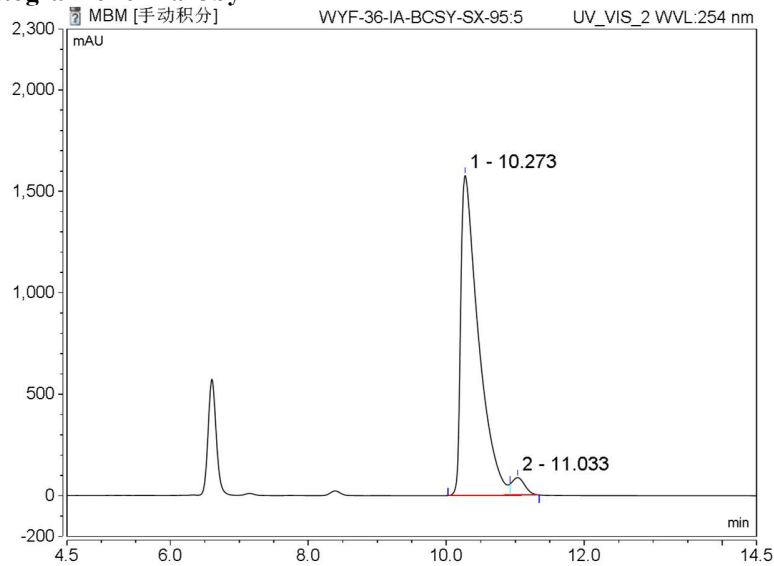

| No.    | Retention Time<br>min | Area<br>mAU*min | Relative Area<br>% |
|--------|-----------------------|-----------------|--------------------|
| 1      | 10.273                | 471.073         | 96.21              |
| 2      | 11.033                | 18.539          | 3.79               |
| Total: |                       | 489.611         | 100                |

### HPLC chromatogram of racemic 4

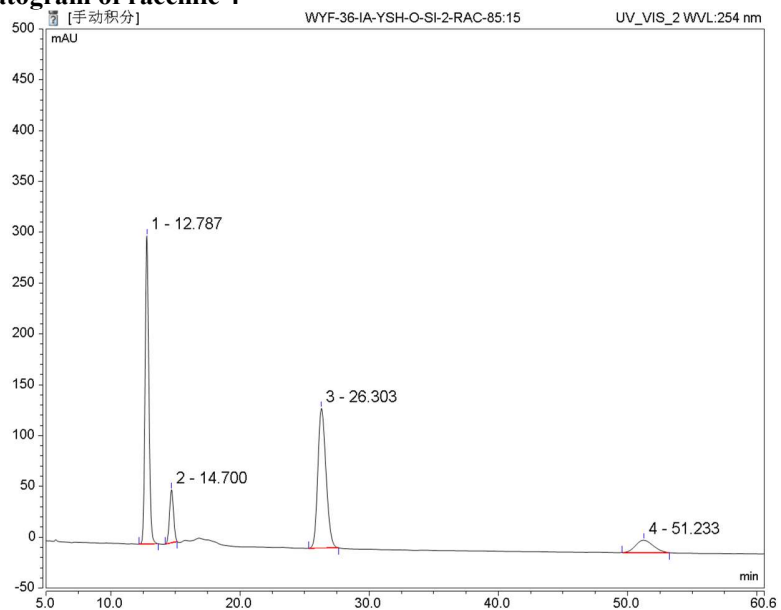

| No.    | Retention Time<br>min | Area<br>mAU*min | Relative Area<br>% |
|--------|-----------------------|-----------------|--------------------|
| 1      | 12.787                | 101.27          | 42.13              |
| 2      | 14.7                  | 18.788          | 7.82               |
| 3      | 26.303                | 101.084         | 42.05              |
| 4      | 51.233                | 19.248          | 8.01               |
| Total: |                       | 240.39          | 100                |

### HPLC chromatogram of chiral 4

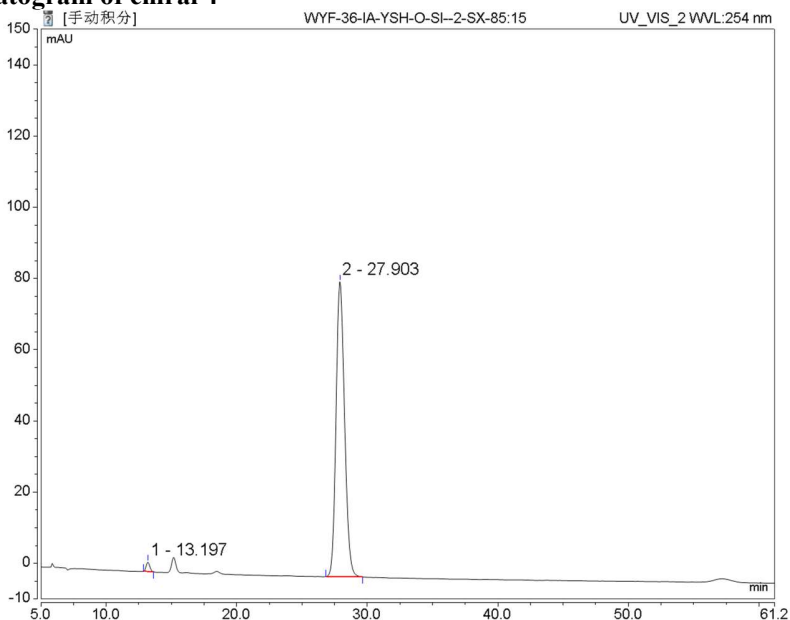

| No.    | Retention Time<br>min | Area<br>mAU*min | Relative Area<br>% |
|--------|-----------------------|-----------------|--------------------|
| 1      | 13.197                | 0.851           | 1.34               |
| 2      | 27.903                | 62.59           | 98.66              |
| Total: |                       | 63.441          | 100                |

### HPLC chromatogram of racemic 5

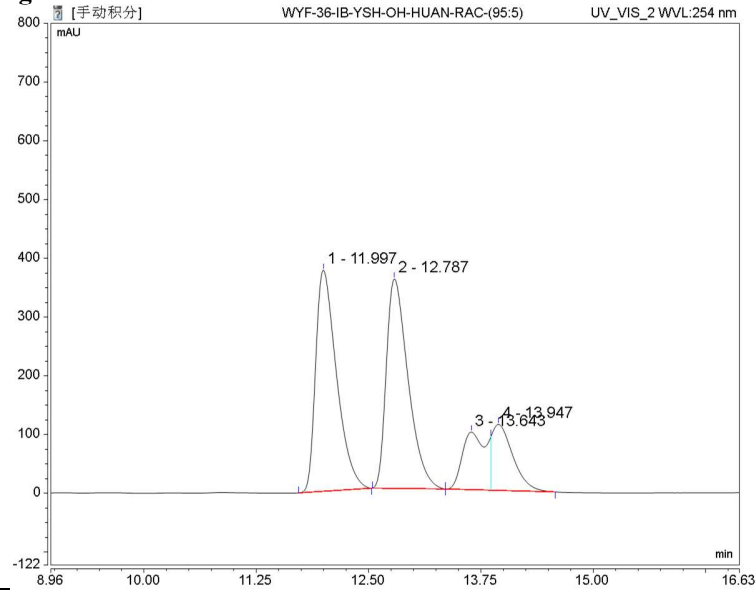

| No.    | Retention Time<br>min | Area<br>mAU*min | Relative Area<br>% |
|--------|-----------------------|-----------------|--------------------|
| 1      | 11.997                | 101.49          | 38.8               |
| 2      | 12.787                | 100.257         | 38.32              |
| 3      | 13.643                | 30.063          | 11.49              |
| 4      | 13.947                | 29.791          | 11.39              |
| Total: |                       | 261.6           | 100                |

### HPLC chromatogram of chiral 5

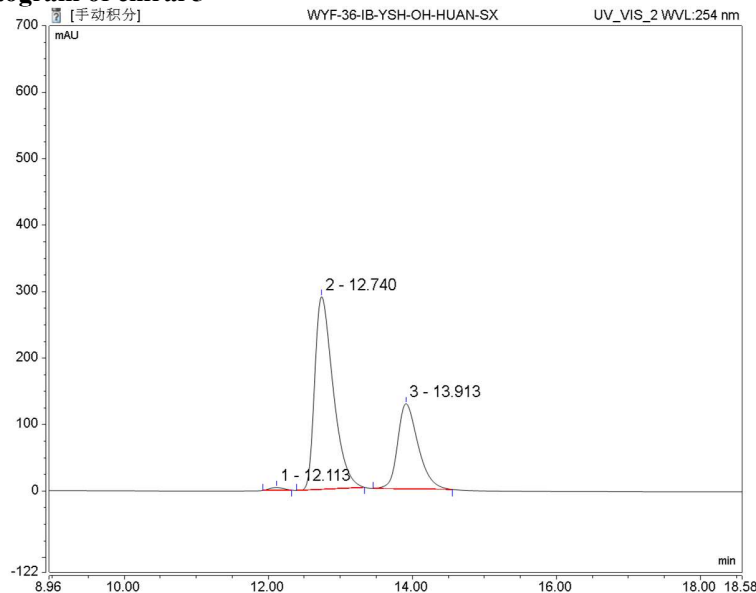

| No.    | Retention Time<br>min | Area<br>mAU*min | Relative Area<br>% |
|--------|-----------------------|-----------------|--------------------|
| 1      | 12.113                | 0.881           | 0.68               |
| 2      | 12.74                 | 86.299          | 66.69              |
| 3      | 13.913                | 42.214          | 32.62              |
| Total: |                       | 129.394         | 100                |

### HPLC chromatogram of racemic 6

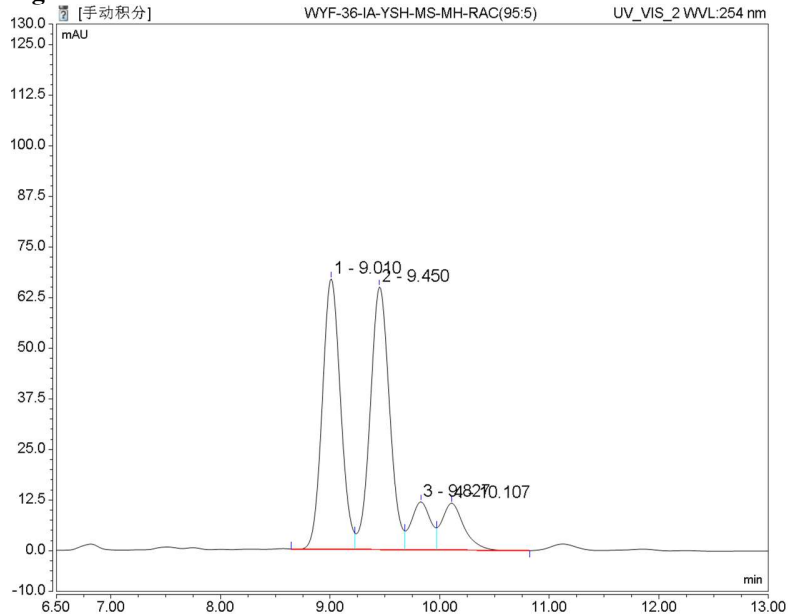

| No.    | Retention Time<br>min | Area<br>mAU*min | Relative Area<br>% |
|--------|-----------------------|-----------------|--------------------|
| 1      | 9.01                  | 12.858          | 41.22              |
| 2      | 9.45                  | 13.199          | 42.31              |
| 3      | 9.827                 | 2.419           | 7.75               |
| 4      | 10.107                | 2.718           | 8.71               |
| Total: |                       | 31.194          | 100                |

### HPLC chromatogram of chiral 6

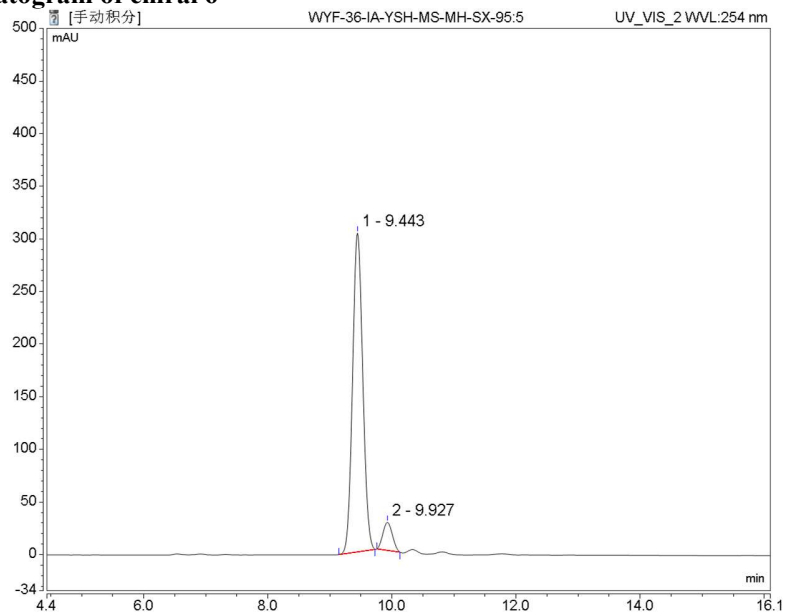

| No.    | Retention Time<br>min | Area<br>mAU*min | Relative Area<br>% |
|--------|-----------------------|-----------------|--------------------|
| 1      | 9.443                 | 57.694          | 92.44              |
| 2      | 9.927                 | 4.718           | 7.56               |
| Total: |                       | 62.412          | 100                |



## X-Ray Crystallographic Data of 3ba and 6

Crystallographic data for **3ba** have been deposited with the Cambridge Crystallographic Data Centre as deposition number CCDC 2335107. These data can be obtained free of charge via [www.ccdc.cam.ac.uk/data\\_request/cif](http://www.ccdc.cam.ac.uk/data_request/cif), or by emailing [data\\_request@ccdc.cam.ac.uk](mailto:data_request@ccdc.cam.ac.uk), or by contacting The Cambridge Crystallographic Data Centre, 12, Union Road, Cambridge CB2 1EZ, UK; fax: +44 1223 336033.

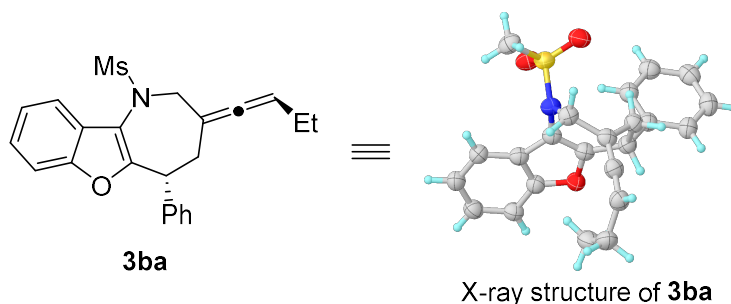

**Table 1 Crystal data and structure refinement for 3ba.**

|                                    |                                                               |
|------------------------------------|---------------------------------------------------------------|
| Identification code                | 3ba                                                           |
| Empirical formula                  | C <sub>23</sub> H <sub>23</sub> NO <sub>3</sub> S             |
| Formula weight                     | 393.48                                                        |
| Temperature/K                      | 150.00                                                        |
| Crystal system                     | orthorhombic                                                  |
| Space group                        | P2 <sub>1</sub> 2 <sub>1</sub> 2 <sub>1</sub>                 |
| a/Å                                | 10.9922(2)                                                    |
| b/Å                                | 11.1557(2)                                                    |
| c/Å                                | 16.1415(3)                                                    |
| α/°                                | 90                                                            |
| β/°                                | 90                                                            |
| γ/°                                | 90                                                            |
| Volume/Å <sup>3</sup>              | 1979.36(6)                                                    |
| Z                                  | 4                                                             |
| ρ <sub>calc</sub> /cm <sup>3</sup> | 1.320                                                         |
| μ/mm <sup>-1</sup>                 | 1.645                                                         |
| F(000)                             | 832.0                                                         |
| Crystal size/mm <sup>3</sup>       | 0.2 × 0.15 × 0.1                                              |
| Radiation                          | CuKα (λ = 1.54178)                                            |
| 2θ range for data collection/°     | 9.638 to 149.2                                                |
| Index ranges                       | -13 ≤ h ≤ 13, -13 ≤ k ≤ 13, -17 ≤ l ≤ 20                      |
| Reflections collected              | 16934                                                         |
| Independent reflections            | 3987 [R <sub>int</sub> = 0.0278, R <sub>sigma</sub> = 0.0303] |
| Data/restraints/parameters         | 3987/0/255                                                    |
| Goodness-of-fit on F <sup>2</sup>  | 1.133                                                         |

Final R indexes [ $I \geq 2\sigma(I)$ ]  $R_1 = 0.0588$ ,  $wR_2 = 0.1291$   
 Final R indexes [all data]  $R_1 = 0.0589$ ,  $wR_2 = 0.1293$   
 Largest diff. peak/hole /  $e \text{ \AA}^{-3}$  0.63/-0.26  
 Flack parameter 0.030(4)

**Table 2 Fractional Atomic Coordinates ( $\times 10^4$ ) and Equivalent Isotropic Displacement Parameters ( $\text{\AA}^2 \times 10^3$ ) for 3ba.  $U_{eq}$  is defined as 1/3 of the trace of the orthogonalised  $U_{ij}$  tensor.**

| Atom | x          | y          | z          | U(eq)   |
|------|------------|------------|------------|---------|
| S001 | 751.5(5)   | 2875.2(5)  | 7699.0(4)  | 45.1(2) |
| O002 | 3468.8(16) | 3478.9(16) | 5484.6(12) | 46.5(4) |
| O003 | 1286(2)    | 4035(2)    | 7808.2(12) | 56.8(5) |
| O004 | 1171(2)    | 1910(2)    | 8210.7(13) | 59.1(5) |
| C005 | 4542(2)    | 1723(2)    | 6873.3(16) | 44.8(5) |
| C006 | 1608(2)    | 4272(2)    | 5791.1(16) | 44.5(5) |
| N007 | 882(2)     | 2547.4(19) | 6710.7(13) | 45.2(5) |
| C008 | 1774(2)    | 3157(2)    | 6226.1(15) | 44.0(5) |
| C009 | 2883(2)    | 2728(2)    | 6027.2(15) | 44.6(5) |
| C00A | 3532(2)    | 1585(2)    | 6232.8(16) | 45.4(5) |
| C00B | 6385(3)    | 947(3)     | 7494(2)    | 55.9(6) |
| C00C | 5528(2)    | 933(2)     | 6859.8(18) | 50.7(6) |
| C00D | 2627(2)    | 611(2)     | 6538.2(16) | 46.9(5) |
| C00E | 1145(3)    | -418(3)    | 4623.3(18) | 54.6(6) |
| C00F | 1449(2)    | 621(2)     | 6050.3(17) | 46.0(5) |
| C00G | 695(2)     | 5133(2)    | 5733.8(16) | 48.9(5) |
| C00H | 1297(3)    | 66(2)      | 5344.6(16) | 48.9(5) |
| C00I | 425(2)     | 1380(2)    | 6407.1(17) | 47.7(5) |
| C00J | 1968(3)    | 6225(2)    | 4759.7(17) | 51.7(6) |
| C00K | 2887(3)    | 5381(2)    | 4811.7(16) | 48.1(5) |
| C00L | 889(3)     | 6109(2)    | 5217.6(17) | 51.4(6) |
| C00M | 4452(2)    | 2543(3)    | 7521.1(16) | 48.6(5) |
| C00N | 2683(2)    | 4417(2)    | 5340.5(15) | 45.3(5) |
| C00O | 1453(3)    | 208(3)     | 3818.9(19) | 64.9(8) |
| C00P | 1998(3)    | 1431(4)    | 3936(2)    | 66.9(8) |
| C00Q | 5325(3)    | 2560(3)    | 8146.7(18) | 52.4(6) |
| C00R | 6282(3)    | 1751(3)    | 8137.7(19) | 54.8(6) |
| C00S | -836(2)    | 2987(3)    | 7834.3(19) | 55.3(6) |

**Table 3 Anisotropic Displacement Parameters ( $\text{\AA}^2 \times 10^3$ ) for 3ba. The Anisotropic displacement factor exponent takes the form:  $-2\pi^2[h^2a^{*2}U_{11}+2hka^*b^*U_{12}+\dots]$ .**

| Atom | U <sub>11</sub> | U <sub>22</sub> | U <sub>33</sub> | U <sub>23</sub> | U <sub>13</sub> | U <sub>12</sub> |
|------|-----------------|-----------------|-----------------|-----------------|-----------------|-----------------|
| S001 | 43.8(3)         | 50.7(3)         | 40.8(3)         | -1.7(2)         | 2.60(19)        | -4.5(2)         |
| O002 | 46.1(9)         | 46.9(8)         | 46.4(9)         | 4.4(7)          | 2.8(7)          | 1.3(7)          |
| O003 | 58.4(10)        | 62.8(11)        | 49.1(10)        | -10.4(8)        | 5.2(8)          | -12.2(9)        |
| O004 | 60.3(11)        | 69.9(12)        | 47.1(10)        | 6.3(9)          | 1.5(8)          | 1.3(10)         |
| C005 | 44.1(11)        | 43.6(10)        | 46.7(12)        | 4.0(9)          | 2.9(10)         | -0.5(9)         |
| C006 | 47.3(12)        | 46.2(11)        | 40.0(11)        | -1.6(9)         | -0.1(9)         | -1.7(10)        |
| N007 | 48.8(10)        | 45.3(10)        | 41.6(10)        | -1.8(8)         | 3.7(8)          | -5.3(8)         |
| C008 | 46.7(11)        | 45.8(11)        | 39.5(11)        | -0.7(9)         | 0.4(9)          | -1.6(9)         |
| C009 | 47.2(11)        | 45.2(11)        | 41.5(11)        | 0.7(9)          | 0.0(9)          | -3.3(10)        |
| C00A | 48.0(12)        | 43.6(11)        | 44.6(12)        | 0.6(9)          | 1.5(9)          | 0.8(10)         |
| C00B | 44.4(12)        | 51.4(13)        | 71.9(18)        | 5.9(12)         | -2.4(11)        | 4.1(10)         |
| C00C | 46.3(12)        | 45.7(11)        | 60.2(14)        | -0.6(10)        | 1.1(11)         | 1.1(10)         |
| C00D | 50.1(12)        | 43.6(10)        | 46.9(11)        | 1.6(9)          | -2.1(10)        | -1.3(9)         |
| C00E | 60.7(15)        | 49.7(12)        | 53.3(14)        | -6.8(10)        | -4.2(11)        | 3.8(11)         |
| C00F | 49.9(12)        | 42.8(11)        | 45.2(11)        | 1.3(9)          | 0.1(10)         | -4.3(10)        |
| C00G | 49.3(13)        | 49.5(12)        | 47.9(12)        | -1.4(10)        | 2.5(10)         | 3.5(10)         |
| C00H | 50.4(12)        | 43.8(11)        | 52.4(13)        | 2.1(10)         | -1.7(10)        | -1.6(10)        |
| C00I | 48.1(12)        | 46.7(12)        | 48.1(12)        | -3.0(10)        | 0.4(10)         | -4.4(10)        |
| C00J | 62.1(15)        | 46.0(12)        | 47.1(12)        | 3.2(10)         | 0.9(11)         | 0.9(11)         |
| C00K | 50.9(13)        | 49.2(12)        | 44.1(12)        | 3.0(10)         | 2.0(10)         | -1.9(10)        |
| C00L | 56.8(14)        | 47.9(12)        | 49.5(12)        | -0.1(10)        | -0.7(11)        | 8.4(11)         |
| C00M | 46.9(11)        | 47.1(12)        | 51.7(13)        | 1.4(10)         | 0.7(10)         | 1.2(10)         |
| C00N | 46.6(11)        | 45.4(12)        | 43.9(11)        | -0.8(9)         | -1.3(9)         | 1.9(10)         |
| C00O | 71.4(18)        | 78.5(19)        | 44.8(13)        | -6.1(14)        | -1.3(12)        | 13.7(16)        |
| C00P | 66.6(18)        | 80(2)           | 54.3(15)        | 15.6(15)        | 6.6(14)         | 7.4(16)         |
| C00Q | 51.3(13)        | 57.0(13)        | 48.8(13)        | 1.8(11)         | 1.0(10)         | -5.3(11)        |
| C00R | 47.7(12)        | 60.4(14)        | 56.3(15)        | 11.3(12)        | -3.1(11)        | -8.0(12)        |
| C00S | 42.6(12)        | 67.3(16)        | 56.0(14)        | -9.5(12)        | 6.9(10)         | -2.8(11)        |

**Table 4 Bond Lengths for 3ba.**

| Atom | Atom | Length/ $\text{\AA}$ | Atom | Atom | Length/ $\text{\AA}$ |
|------|------|----------------------|------|------|----------------------|
| S001 | O003 | 1.432(2)             | C00A | C00D | 1.553(4)             |
| S001 | O004 | 1.433(2)             | C00B | C00C | 1.391(4)             |
| S001 | N007 | 1.643(2)             | C00B | C00R | 1.377(5)             |
| S001 | C00S | 1.763(3)             | C00D | C00F | 1.515(4)             |
| O002 | C009 | 1.373(3)             | C00E | C00H | 1.294(4)             |
| O002 | C00N | 1.377(3)             | C00E | C00O | 1.513(4)             |

**Table 4 Bond Lengths for 3ba.**

| Atom | Atom | Length/Å | Atom | Atom | Length/Å |
|------|------|----------|------|------|----------|
| C005 | C00A | 1.525(3) | C00F | C00H | 1.307(4) |
| C005 | C00C | 1.397(4) | C00F | C00I | 1.522(4) |
| C005 | C00M | 1.393(4) | C00G | C00L | 1.387(4) |
| C006 | C008 | 1.440(3) | C00J | C00K | 1.384(4) |
| C006 | C00G | 1.392(4) | C00J | C00L | 1.404(4) |
| C006 | C00N | 1.397(3) | C00K | C00N | 1.391(4) |
| N007 | C008 | 1.427(3) | C00M | C00Q | 1.393(4) |
| N007 | C00I | 1.479(3) | C00O | C00P | 1.502(6) |
| C008 | C009 | 1.348(4) | C00Q | C00R | 1.386(5) |
| C009 | C00A | 1.498(3) |      |      |          |

**Table 5 Bond Angles for 3ba.**

| Atom | Atom | Atom | Angle/°    | Atom | Atom | Atom | Angle/°  |
|------|------|------|------------|------|------|------|----------|
| O003 | S001 | O004 | 118.41(14) | C009 | C00A | C005 | 114.3(2) |
| O003 | S001 | N007 | 106.55(11) | C009 | C00A | C00D | 111.2(2) |
| O003 | S001 | C00S | 109.08(14) | C00R | C00B | C00C | 120.4(3) |
| O004 | S001 | N007 | 111.35(12) | C00B | C00C | C005 | 120.5(3) |
| O004 | S001 | C00S | 107.48(15) | C00F | C00D | C00A | 112.2(2) |
| N007 | S001 | C00S | 102.86(13) | C00H | C00E | C00O | 123.4(3) |
| C009 | O002 | C00N | 106.13(19) | C00D | C00F | C00I | 116.0(2) |
| C00C | C005 | C00A | 119.4(2)   | C00H | C00F | C00D | 123.9(2) |
| C00M | C005 | C00A | 121.5(2)   | C00H | C00F | C00I | 120.0(2) |
| C00M | C005 | C00C | 118.8(2)   | C00L | C00G | C006 | 118.1(2) |
| C00G | C006 | C008 | 136.1(2)   | C00E | C00H | C00F | 176.3(3) |
| C00G | C006 | C00N | 119.6(2)   | N007 | C00I | C00F | 111.4(2) |
| C00N | C006 | C008 | 104.3(2)   | C00K | C00J | C00L | 121.5(3) |
| C008 | N007 | S001 | 119.09(17) | C00J | C00K | C00N | 116.5(2) |
| C008 | N007 | C00I | 118.1(2)   | C00G | C00L | C00J | 121.2(2) |
| C00I | N007 | S001 | 119.21(18) | C00Q | C00M | C005 | 120.3(3) |
| N007 | C008 | C006 | 126.3(2)   | O002 | C00N | C006 | 110.8(2) |
| C009 | C008 | C006 | 107.8(2)   | O002 | C00N | C00K | 126.2(2) |
| C009 | C008 | N007 | 125.6(2)   | C00K | C00N | C006 | 123.1(2) |
| O002 | C009 | C00A | 116.0(2)   | C00P | C00O | C00E | 113.6(3) |
| C008 | C009 | O002 | 111.0(2)   | C00R | C00Q | C00M | 120.4(3) |
| C008 | C009 | C00A | 132.8(2)   | C00B | C00R | C00Q | 119.6(3) |
| C005 | C00A | C00D | 108.8(2)   |      |      |      |          |

**Table 6 Torsion Angles for 3ba.**

| A    | B    | C    | D    | Angle/°   | A    | B    | C    | D    | Angle/°   |
|------|------|------|------|-----------|------|------|------|------|-----------|
| S001 | N007 | C008 | C006 | -88.6(3)  | C00C | C005 | C00A | C009 | -151.9(2) |
| S001 | N007 | C008 | C009 | 98.6(3)   | C00C | C005 | C00A | C00D | 83.2(3)   |
| S001 | N007 | C00I | C00F | -117.7(2) | C00C | C005 | C00M | C00Q | -0.8(4)   |
| O002 | C009 | C00A | C005 | 79.4(3)   | C00C | C00B | C00R | C00Q | -0.8(4)   |
| O002 | C009 | C00A | C00D | -157.0(2) | C00D | C00F | C00I | N007 | 42.6(3)   |
| O003 | S001 | N007 | C008 | 20.7(2)   | C00G | C006 | C008 | N007 | 6.4(5)    |
| O003 | S001 | N007 | C00I | 179.0(2)  | C00G | C006 | C008 | C009 | -179.7(3) |
| O004 | S001 | N007 | C008 | -109.8(2) | C00G | C006 | C00N | O002 | 179.6(2)  |
| O004 | S001 | N007 | C00I | 48.5(2)   | C00G | C006 | C00N | C00K | -1.5(4)   |
| C005 | C00A | C00D | C00F | 166.4(2)  | C00H | C00E | C00O | C00P | 2.1(5)    |
| C005 | C00M | C00Q | C00R | -0.9(4)   | C00H | C00F | C00I | N007 | -134.7(3) |
| C006 | C008 | C009 | O002 | -0.3(3)   | C00I | N007 | C008 | C006 | 112.9(3)  |
| C006 | C008 | C009 | C00A | -175.3(3) | C00I | N007 | C008 | C009 | -59.9(3)  |
| C006 | C00G | C00L | C00J | 0.5(4)    | C00J | C00K | C00N | O002 | 179.9(3)  |
| N007 | C008 | C009 | O002 | 173.7(2)  | C00J | C00K | C00N | C006 | 1.2(4)    |
| N007 | C008 | C009 | C00A | -1.3(4)   | C00K | C00J | C00L | C00G | -0.8(4)   |
| C008 | C006 | C00G | C00L | -179.1(3) | C00L | C00J | C00K | C00N | -0.1(4)   |
| C008 | C006 | C00N | O002 | -0.5(3)   | C00M | C005 | C00A | C009 | 34.3(3)   |
| C008 | C006 | C00N | C00K | 178.3(2)  | C00M | C005 | C00A | C00D | -90.5(3)  |
| C008 | N007 | C00I | C00F | 40.8(3)   | C00M | C005 | C00C | C00B | 1.7(4)    |
| C008 | C009 | C00A | C005 | -105.8(3) | C00M | C00Q | C00R | C00B | 1.7(4)    |
| C008 | C009 | C00A | C00D | 17.8(4)   | C00N | O002 | C009 | C008 | -0.1(3)   |
| C009 | O002 | C00N | C006 | 0.4(3)    | C00N | O002 | C009 | C00A | 175.8(2)  |
| C009 | O002 | C00N | C00K | -178.4(2) | C00N | C006 | C008 | N007 | -173.4(2) |
| C009 | C00A | C00D | C00F | 39.8(3)   | C00N | C006 | C008 | C009 | 0.5(3)    |
| C00A | C005 | C00C | C00B | -172.2(2) | C00N | C006 | C00G | C00L | 0.6(4)    |
| C00A | C005 | C00M | C00Q | 173.0(2)  | C00R | C00B | C00C | C005 | -0.9(4)   |
| C00A | C00D | C00F | C00H | 84.5(3)   | C00S | S001 | N007 | C008 | 135.4(2)  |
| C00A | C00D | C00F | C00I | -92.7(3)  | C00S | S001 | N007 | C00I | -66.3(2)  |

**Table 7 Hydrogen Atom Coordinates ( $\text{\AA} \times 10^4$ ) and Isotropic Displacement Parameters ( $\text{\AA}^2 \times 10^3$ ) for 3ba.**

| Atom | x       | y       | z       | U(eq) |
|------|---------|---------|---------|-------|
| H00A | 3912.94 | 1282.15 | 5710.61 | 54    |
| H00B | 7045.72 | 398.4   | 7482.8  | 67    |
| H00C | 5614.42 | 383.06  | 6414.44 | 61    |
| H00D | 3011.99 | -187.69 | 6486.64 | 56    |
| H00E | 2444.13 | 748.09  | 7131.3  | 56    |

**Table 7 Hydrogen Atom Coordinates ( $\text{\AA} \times 10^4$ ) and Isotropic Displacement Parameters ( $\text{\AA}^2 \times 10^3$ ) for 3ba.**

| Atom | <i>x</i> | <i>y</i> | <i>z</i> | U(eq) |
|------|----------|----------|----------|-------|
| H00F | 822.21   | -1206.78 | 4597.56  | 65    |
| H00G | -38.98   | 5055.02  | 6039.46  | 59    |
| H00H | -197.84  | 1518.48  | 5974.66  | 57    |
| H00I | 34.88    | 942.56   | 6869.71  | 57    |
| H00J | 2070.24  | 6898.51  | 4406.09  | 62    |
| H00K | 3618.9   | 5455.28  | 4502.68  | 58    |
| H00L | 280.01   | 6709.92  | 5173.19  | 62    |
| H00M | 3792.73  | 3093.12  | 7536.25  | 58    |
| H00N | 2033.27  | -295.36  | 3504.2   | 78    |
| H00O | 703.36   | 284.17   | 3483.08  | 78    |
| H00P | 2074.38  | 1829.04  | 3397.35  | 100   |
| H00Q | 2804.3   | 1354.11  | 4189.9   | 100   |
| H00R | 1471.19  | 1909.07  | 4298     | 100   |
| H00S | 5263.43  | 3129.46  | 8582.25  | 63    |
| H00T | 6862.87  | 1750.32  | 8573.22  | 66    |
| H00U | -1016.46 | 3166.8   | 8415.78  | 83    |
| H00V | -1219.98 | 2226.32  | 7680.07  | 83    |
| H00W | -1154.39 | 3630.54  | 7482.29  | 83    |

Crystallographic data for **6** have been deposited with the Cambridge Crystallographic Data Centre as deposition number CCDC 2335108. These data can be obtained free of charge via [www.ccdc.cam.ac.uk/data\\_request/cif](http://www.ccdc.cam.ac.uk/data_request/cif), or by emailing [data\\_request@ccdc.cam.ac.uk](mailto:data_request@ccdc.cam.ac.uk), or by contacting The Cambridge Crystallographic Data Centre, 12, Union Road, Cambridge CB2 1EZ, UK; fax: +44 1223 336033.

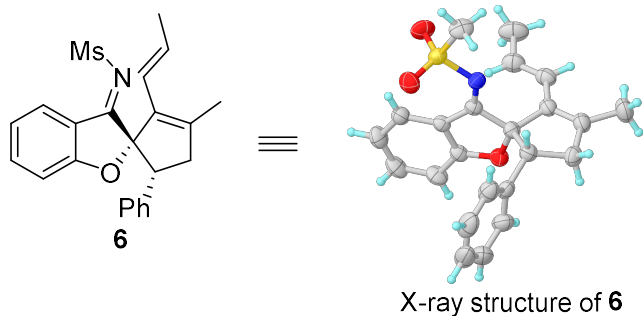

**Table 1 Crystal data and structure refinement for 6.**

|                     |                                                   |
|---------------------|---------------------------------------------------|
| Identification code | 6                                                 |
| Empirical formula   | C <sub>23</sub> H <sub>23</sub> NO <sub>3</sub> S |
| Formula weight      | 393.48                                            |
| Temperature/K       | 293(2)                                            |

|                                             |                                                               |
|---------------------------------------------|---------------------------------------------------------------|
| Crystal system                              | orthorhombic                                                  |
| Space group                                 | P2 <sub>1</sub> 2 <sub>1</sub> 2 <sub>1</sub>                 |
| a/Å                                         | 7.79420(10)                                                   |
| b/Å                                         | 10.27180(10)                                                  |
| c/Å                                         | 25.9536(4)                                                    |
| $\alpha$ /°                                 | 90                                                            |
| $\beta$ /°                                  | 90                                                            |
| $\gamma$ /°                                 | 90                                                            |
| Volume/Å <sup>3</sup>                       | 2077.86(5)                                                    |
| Z                                           | 4                                                             |
| $\rho_{\text{calc}}/\text{cm}^3$            | 1.258                                                         |
| $\mu/\text{mm}^{-1}$                        | 1.567                                                         |
| F(000)                                      | 832.0                                                         |
| Crystal size/mm <sup>3</sup>                | 0.2 × 0.15 × 0.1                                              |
| Radiation                                   | Cu K $\alpha$ ( $\lambda$ = 1.54184)                          |
| 2 $\theta$ range for data collection/°      | 6.812 to 136.644                                              |
| Index ranges                                | -9 ≤ h ≤ 9, -10 ≤ k ≤ 12, -27 ≤ l ≤ 31                        |
| Reflections collected                       | 18670                                                         |
| Independent reflections                     | 3774 [R <sub>int</sub> = 0.1448, R <sub>sigma</sub> = 0.0799] |
| Data/restraints/parameters                  | 3774/0/257                                                    |
| Goodness-of-fit on F <sup>2</sup>           | 1.152                                                         |
| Final R indexes [I ≥ 2 $\sigma$ (I)]        | R <sub>1</sub> = 0.0729, wR <sub>2</sub> = 0.1902             |
| Final R indexes [all data]                  | R <sub>1</sub> = 0.0770, wR <sub>2</sub> = 0.1940             |
| Largest diff. peak/hole / e Å <sup>-3</sup> | 0.45/-0.53                                                    |
| Flack parameter                             | -0.04(4)                                                      |

**Table 2 Fractional Atomic Coordinates ( $\times 10^4$ ) and Equivalent Isotropic Displacement Parameters ( $\text{\AA}^2 \times 10^3$ ) for 6.  $U_{\text{eq}}$  is defined as 1/3 of the trace of the orthogonalised  $U_{ij}$  tensor.**

| Atom | x         | y          | z          | U(eq)    |
|------|-----------|------------|------------|----------|
| S25  | 231.3(15) | 4184.8(10) | 7301.3(5)  | 38.1(4)  |
| O9   | 3902(4)   | 3886(3)    | 5757.3(12) | 40.9(8)  |
| O27  | 1499(5)   | 4788(4)    | 7616.6(15) | 55.3(10) |
| O26  | -91(5)    | 2831(3)    | 7386.1(16) | 56.4(10) |
| N24  | 615(5)    | 4455(4)    | 6687.0(15) | 38.1(9)  |
| C13  | 945(6)    | 4075(5)    | 5502.6(18) | 39.9(11) |
| C1   | 2264(6)   | 4473(5)    | 5904.2(18) | 35.7(10) |
| C8   | 4567(6)   | 3294(4)    | 6181.0(19) | 37.0(10) |
| C4   | 4033(6)   | 2711(5)    | 7065(2)    | 42.7(11) |
| C3   | 3502(6)   | 3342(4)    | 6613.7(18) | 34.2(10) |
| C14  | 3941(7)   | 6641(5)    | 6036.3(19) | 43.6(12) |
| C2   | 2002(5)   | 4063(4)    | 6462.5(18) | 34.5(10) |

**Table 2 Fractional Atomic Coordinates ( $\times 10^4$ ) and Equivalent Isotropic Displacement Parameters ( $\text{\AA}^2 \times 10^3$ ) for 6.  $U_{\text{eq}}$  is defined as 1/3 of the trace of the orthogonalised  $U_{ij}$  tensor.**

| Atom | x        | y       | z          | $U_{\text{eq}}$ |
|------|----------|---------|------------|-----------------|
| C12  | 674(6)   | 5071(5) | 5172(2)    | 45.1(12)        |
| C6   | 6624(7)  | 2056(6) | 6633(2)    | 55.7(15)        |
| C5   | 5577(7)  | 2075(5) | 7069(2)    | 52.7(14)        |
| C20  | 260(7)   | 2774(5) | 5459(2)    | 46.8(12)        |
| C11  | 1718(7)  | 6245(5) | 5305(2)    | 48.1(13)        |
| C10  | 2320(6)  | 5979(5) | 5856.5(19) | 39.9(11)        |
| C15  | 3859(9)  | 7532(6) | 6441(2)    | 57.7(15)        |
| C19  | 5520(8)  | 6427(6) | 5809(2)    | 56.0(14)        |
| C21  | 559(7)   | 1760(5) | 5759(2)    | 52.0(13)        |
| C23  | -460(9)  | 5072(7) | 4709(2)    | 67.0(18)        |
| C7   | 6142(6)  | 2663(6) | 6182(2)    | 50.1(13)        |
| C28  | -1689(8) | 5037(5) | 7360(3)    | 55.5(15)        |
| C18  | 6972(9)  | 7037(8) | 5989(3)    | 75(2)           |
| C16  | 5325(11) | 8154(7) | 6611(3)    | 76(2)           |
| C22  | -184(9)  | 437(6)  | 5686(3)    | 71.0(18)        |
| C17  | 6863(11) | 7917(8) | 6386(3)    | 84(3)           |

**Table 3 Anisotropic Displacement Parameters ( $\text{\AA}^2 \times 10^3$ ) for 6. The Anisotropic displacement factor exponent takes the form:  $-2\pi^2[h^2a^*2U_{11}+2hka^*b^*U_{12}+\dots]$ .**

| Atom | $U_{11}$ | $U_{22}$ | $U_{33}$ | $U_{23}$ | $U_{13}$ | $U_{12}$ |
|------|----------|----------|----------|----------|----------|----------|
| S25  | 40.2(6)  | 32.1(6)  | 41.8(7)  | 0.9(5)   | 4.7(5)   | -0.3(4)  |
| O9   | 35.3(16) | 46.4(19) | 41.0(18) | -0.7(15) | 3.5(14)  | 6.8(14)  |
| O27  | 57(2)    | 59(2)    | 50(2)    | -9.2(18) | -8.8(18) | -6.5(18) |
| O26  | 60(2)    | 32.1(17) | 77(3)    | 10.8(17) | 8(2)     | -4.2(16) |
| N24  | 37.0(19) | 38(2)    | 39(2)    | 4.3(17)  | 2.6(16)  | 1.9(18)  |
| C13  | 37(2)    | 45(2)    | 38(2)    | -1(2)    | -1(2)    | 1(2)     |
| C1   | 33(2)    | 35(2)    | 39(3)    | 1.5(19)  | 0.0(18)  | 4.2(19)  |
| C8   | 32(2)    | 33(2)    | 46(3)    | -3(2)    | -2.0(19) | 1(2)     |
| C4   | 42(2)    | 40(3)    | 47(3)    | 4(2)     | -2(2)    | 0(2)     |
| C3   | 30.7(19) | 31(2)    | 41(3)    | -1.5(19) | -1.0(19) | 1.7(18)  |
| C14  | 54(3)    | 42(3)    | 35(3)    | 7(2)     | -2(2)    | -10(2)   |
| C2   | 34(2)    | 30(2)    | 40(3)    | -2.8(19) | -0.2(18) | -2(2)    |
| C12  | 41(3)    | 52(3)    | 42(3)    | 1(2)     | -5(2)    | 4(2)     |
| C6   | 39(2)    | 53(3)    | 75(4)    | -7(3)    | -11(3)   | 14(3)    |
| C5   | 49(3)    | 49(3)    | 60(3)    | 4(2)     | -11(3)   | 13(3)    |
| C20  | 42(2)    | 51(3)    | 47(3)    | -8(2)    | -1(2)    | -8(2)    |



**Table 3 Anisotropic Displacement Parameters ( $\text{\AA}^2 \times 10^3$ ) for 6. The anisotropic displacement factor exponent takes the form:  $-2\pi^2[h^2a^{*2}U_{11}+2hka^*b^*U_{12}+\dots]$ .**

| Atom | U <sub>11</sub> | U <sub>22</sub> | U <sub>33</sub> | U <sub>23</sub> | U <sub>13</sub> | U <sub>12</sub> |
|------|-----------------|-----------------|-----------------|-----------------|-----------------|-----------------|
| C11  | 53(3)           | 44(3)           | 47(3)           | 8(2)            | -5(2)           | 4(2)            |
| C10  | 41(2)           | 38(2)           | 41(3)           | 1(2)            | 0(2)            | 1(2)            |
| C15  | 78(4)           | 51(3)           | 44(3)           | 0(3)            | -2(3)           | -13(3)          |
| C19  | 55(3)           | 60(3)           | 52(3)           | 3(3)            | 4(3)            | -18(3)          |
| C21  | 51(3)           | 45(3)           | 60(3)           | -8(3)           | 3(2)            | -7(3)           |
| C23  | 68(4)           | 73(4)           | 60(4)           | 8(3)            | -27(3)          | -6(3)           |
| C7   | 36(2)           | 56(3)           | 59(3)           | -8(3)           | 3(2)            | 8(2)            |
| C28  | 54(3)           | 47(3)           | 65(4)           | -4(3)           | 17(3)           | 6(2)            |
| C18  | 63(4)           | 90(5)           | 71(4)           | 20(4)           | -9(3)           | -32(4)          |
| C16  | 112(6)          | 70(4)           | 44(3)           | -1(3)           | -15(4)          | -31(5)          |
| C22  | 70(4)           | 50(3)           | 93(5)           | -15(3)          | 15(4)           | -18(3)          |
| C17  | 99(6)           | 92(5)           | 60(4)           | 22(4)           | -29(4)          | -56(5)          |

**Table 4 Bond Lengths for 6.**

| Atom Atom | Length/ $\text{\AA}$ | Atom Atom | Length/ $\text{\AA}$ |
|-----------|----------------------|-----------|----------------------|
| S25 O27   | 1.425(4)             | C3 C2     | 1.439(6)             |
| S25 O26   | 1.430(3)             | C14 C10   | 1.509(7)             |
| S25 N24   | 1.646(4)             | C14 C15   | 1.394(8)             |
| S25 C28   | 1.741(6)             | C14 C19   | 1.382(8)             |
| O9 C1     | 1.463(5)             | C12 C11   | 1.495(8)             |
| O9 C8     | 1.359(6)             | C12 C23   | 1.493(8)             |
| N24 C2    | 1.292(6)             | C6 C5     | 1.395(8)             |
| C13 C1    | 1.520(7)             | C6 C7     | 1.378(8)             |
| C13 C12   | 1.352(7)             | C20 C21   | 1.321(7)             |
| C13 C20   | 1.443(7)             | C11 C10   | 1.531(7)             |
| C1 C2     | 1.523(7)             | C15 C16   | 1.381(9)             |
| C1 C10    | 1.552(7)             | C19 C18   | 1.376(9)             |
| C8 C3     | 1.398(7)             | C21 C22   | 1.489(8)             |
| C8 C7     | 1.388(7)             | C18 C17   | 1.374(12)            |
| C4 C3     | 1.402(7)             | C16 C17   | 1.355(12)            |
| C4 C5     | 1.369(7)             |           |                      |

**Table 5 Bond Angles for 6.**

| Atom Atom Atom | Angle/ $^\circ$ | Atom Atom Atom | Angle/ $^\circ$ |
|----------------|-----------------|----------------|-----------------|
| O27 S25 O26    | 117.2(2)        | C15 C14 C10    | 119.3(5)        |

**Table 5 Bond Angles for 6.**

| Atom | Atom | Atom | Angle/°  | Atom | Atom | Atom | Angle/°  |
|------|------|------|----------|------|------|------|----------|
| O27  | S25  | N24  | 110.9(2) | C19  | C14  | C10  | 122.8(5) |
| O27  | S25  | C28  | 109.1(3) | C19  | C14  | C15  | 117.9(5) |
| O26  | S25  | N24  | 110.2(2) | N24  | C2   | C1   | 117.1(4) |
| O26  | S25  | C28  | 108.9(3) | N24  | C2   | C3   | 135.8(4) |
| N24  | S25  | C28  | 99.0(3)  | C3   | C2   | C1   | 107.0(4) |
| C8   | O9   | C1   | 107.8(3) | C13  | C12  | C11  | 112.3(4) |
| C2   | N24  | S25  | 122.4(3) | C13  | C12  | C23  | 127.2(5) |
| C12  | C13  | C1   | 109.7(4) | C23  | C12  | C11  | 120.5(5) |
| C12  | C13  | C20  | 126.4(5) | C7   | C6   | C5   | 121.5(5) |
| C20  | C13  | C1   | 123.6(4) | C4   | C5   | C6   | 121.0(5) |
| O9   | C1   | C13  | 107.5(4) | C21  | C20  | C13  | 128.2(5) |
| O9   | C1   | C2   | 104.5(3) | C12  | C11  | C10  | 103.8(4) |
| O9   | C1   | C10  | 111.4(4) | C14  | C10  | C1   | 116.6(4) |
| C13  | C1   | C2   | 119.2(4) | C14  | C10  | C11  | 117.7(4) |
| C13  | C1   | C10  | 103.5(4) | C11  | C10  | C1   | 104.1(4) |
| C2   | C1   | C10  | 110.8(4) | C16  | C15  | C14  | 120.4(6) |
| O9   | C8   | C3   | 114.0(4) | C18  | C19  | C14  | 121.0(6) |
| O9   | C8   | C7   | 123.3(5) | C20  | C21  | C22  | 125.1(6) |
| C7   | C8   | C3   | 122.7(5) | C6   | C7   | C8   | 117.1(5) |
| C5   | C4   | C3   | 119.1(5) | C17  | C18  | C19  | 120.2(7) |
| C8   | C3   | C4   | 118.7(4) | C17  | C16  | C15  | 120.8(7) |
| C8   | C3   | C2   | 106.4(4) | C16  | C17  | C18  | 119.7(7) |
| C4   | C3   | C2   | 134.9(4) |      |      |      |          |

**Table 6 Torsion Angles for 6.**

| A   | B   | C   | D   | Angle/°   | A   | B   | C   | D   | Angle/°   |
|-----|-----|-----|-----|-----------|-----|-----|-----|-----|-----------|
| S25 | N24 | C2  | C1  | -175.1(3) | C2  | C1  | C10 | C14 | 75.0(5)   |
| S25 | N24 | C2  | C3  | 1.4(8)    | C2  | C1  | C10 | C11 | -153.5(4) |
| O9  | C1  | C2  | N24 | -179.5(4) | C12 | C13 | C1  | O9  | -101.7(4) |
| O9  | C1  | C2  | C3  | 3.0(5)    | C12 | C13 | C1  | C2  | 139.8(5)  |
| O9  | C1  | C10 | C14 | -41.0(6)  | C12 | C13 | C1  | C10 | 16.3(5)   |
| O9  | C1  | C10 | C11 | 90.5(4)   | C12 | C13 | C20 | C21 | 176.5(6)  |
| O9  | C8  | C3  | C4  | 177.2(4)  | C12 | C11 | C10 | C1  | 24.2(5)   |
| O9  | C8  | C3  | C2  | -1.4(5)   | C12 | C11 | C10 | C14 | 155.1(5)  |
| O9  | C8  | C7  | C6  | -177.3(5) | C5  | C4  | C3  | C8  | 0.3(7)    |
| O27 | S25 | N24 | C2  | 61.4(4)   | C5  | C4  | C3  | C2  | 178.5(5)  |
| O26 | S25 | N24 | C2  | -70.0(4)  | C5  | C6  | C7  | C8  | 0.0(8)    |
| C13 | C1  | C2  | N24 | -59.5(6)  | C20 | C13 | C1  | O9  | 72.0(6)   |

**Table 6 Torsion Angles for 6.**

| A   | B   | C   | D   | Angle/°   | A   | B   | C   | D   | Angle/°   |
|-----|-----|-----|-----|-----------|-----|-----|-----|-----|-----------|
| C13 | C1  | C2  | C3  | 123.0(4)  | C20 | C13 | C1  | C2  | -46.5(6)  |
| C13 | C1  | C10 | C14 | -156.2(4) | C20 | C13 | C1  | C10 | -170.0(5) |
| C13 | C1  | C10 | C11 | -24.7(5)  | C20 | C13 | C12 | C11 | -174.3(5) |
| C13 | C12 | C11 | C10 | -15.3(6)  | C20 | C13 | C12 | C23 | 3.7(9)    |
| C13 | C20 | C21 | C22 | -179.3(6) | C10 | C1  | C2  | N24 | 60.3(5)   |
| C1  | O9  | C8  | C3  | 3.4(5)    | C10 | C1  | C2  | C3  | -117.2(4) |
| C1  | O9  | C8  | C7  | -178.4(4) | C10 | C14 | C15 | C16 | -179.7(6) |
| C1  | C13 | C12 | C11 | -0.8(6)   | C10 | C14 | C19 | C18 | -179.1(5) |
| C1  | C13 | C12 | C23 | 177.2(5)  | C15 | C14 | C10 | C1  | -118.6(5) |
| C1  | C13 | C20 | C21 | 3.9(8)    | C15 | C14 | C10 | C11 | 116.5(6)  |
| C8  | O9  | C1  | C13 | -131.4(4) | C15 | C14 | C19 | C18 | 2.4(9)    |
| C8  | O9  | C1  | C2  | -3.8(4)   | C15 | C16 | C17 | C18 | -0.7(11)  |
| C8  | O9  | C1  | C10 | 115.9(4)  | C19 | C14 | C10 | C1  | 62.9(7)   |
| C8  | C3  | C2  | N24 | -177.9(5) | C19 | C14 | C10 | C11 | -61.9(7)  |
| C8  | C3  | C2  | C1  | -1.1(5)   | C19 | C14 | C15 | C16 | -1.2(9)   |
| C4  | C3  | C2  | N24 | 3.8(9)    | C19 | C18 | C17 | C16 | 1.9(11)   |
| C4  | C3  | C2  | C1  | -179.4(5) | C23 | C12 | C11 | C10 | 166.6(5)  |
| C3  | C8  | C7  | C6  | 0.8(8)    | C7  | C8  | C3  | C4  | -1.0(7)   |
| C3  | C4  | C5  | C6  | 0.5(8)    | C7  | C8  | C3  | C2  | -179.6(4) |
| C14 | C15 | C16 | C17 | 0.4(10)   | C7  | C6  | C5  | C4  | -0.7(9)   |
| C14 | C19 | C18 | C17 | -2.8(10)  | C28 | S25 | N24 | C2  | 175.9(4)  |

**Table 7 Hydrogen Atom Coordinates ( $\text{\AA} \times 10^4$ ) and Isotropic Displacement Parameters ( $\text{\AA}^2 \times 10^3$ ) for 6.**

| Atom | x        | y       | z       | U(eq) |
|------|----------|---------|---------|-------|
| H4   | 3345.57  | 2723.92 | 7358.21 | 51    |
| H6   | 7672.23  | 1624.58 | 6647.53 | 67    |
| H5   | 5932.19  | 1648.69 | 7366.93 | 63    |
| H20  | -485.63  | 2631.85 | 5184.82 | 56    |
| H11A | 1026.75  | 7029.45 | 5289.16 | 58    |
| H11B | 2686.57  | 6336.51 | 5073.27 | 58    |
| H10  | 1404.99  | 6304.63 | 6081.08 | 48    |
| H15  | 2811.44  | 7708.37 | 6597.45 | 69    |
| H19  | 5600.84  | 5861.77 | 5529.75 | 67    |
| H21  | 1290.14  | 1881.86 | 6037.92 | 62    |
| H23A | 218.86   | 5219.27 | 4405.54 | 101   |
| H23B | -1300.12 | 5750.32 | 4741.08 | 101   |
| H23C | -1029.47 | 4245.67 | 4680.91 | 101   |

**Table 7 Hydrogen Atom Coordinates ( $\text{\AA}\times 10^4$ ) and Isotropic Displacement Parameters ( $\text{\AA}^2\times 10^3$ ) for 6.**

| <b>Atom</b> | <b>x</b> | <b>y</b> | <b>z</b> | <b>U(eq)</b> |
|-------------|----------|----------|----------|--------------|
| H7          | 6839.9   | 2649.37  | 5891.9   | 60           |
| H28A        | -2103.39 | 4965.63  | 7707.44  | 83           |
| H28B        | -2522.42 | 4677.53  | 7127.77  | 83           |
| H28C        | -1501.49 | 5936.6   | 7277.9   | 83           |
| H18         | 8031.77  | 6853.23  | 5840.83  | 89           |
| H16         | 5255.6   | 8742.54  | 6881.99  | 91           |
| H22A        | -924.2   | 439.59   | 5390.08  | 107          |
| H22B        | -831.75  | 199.08   | 5985.91  | 107          |
| H22C        | 724.88   | -179.77  | 5634.01  | 107          |
| H17         | 7841.02  | 8347.65  | 6500.71  | 100          |
